# Supplementary material
Source: publisher figshare collection journal article supplement (https://acs.figshare.com/ndownloader/files/4850419)

# Supporting Information

---

## **Tryptic stability of synthetic bactenecin derivatives is determined by the side chain length of cationic residues and the peptide conformation**

Mojtaba Bagheri,<sup>\*a</sup> Shima Arasteh<sup>a</sup>, Evan F. Haney<sup>b</sup>, Robert E. W. Hancock<sup>\*b</sup>

<sup>a</sup> Peptide Chemistry Laboratory, Institute of Biochemistry and Biophysics, University of Tehran, 14176-14335 Tehran, Iran, <sup>b</sup> Centre for Microbial Diseases and Immunity Research, University of British Columbia, 2259 Lower Mall Research Station, Vancouver, BC V6T 1Z4, Canada

Corresponding authors:

Dr. Mojtaba Bagheri,  
Peptide Chemistry Laboratory, Institute of Biochemistry and Biophysics,  
University of Tehran,  
16 Azar Street,  
14176-14335 Tehran, Iran  
E-mail: [mojtabagheri@ut.ac.ir](mailto:mojtabagheri@ut.ac.ir),  
Tel: +98 (21) 6696 9255; Fax: +98 (21) 6640 4680

Dr. Robert E. W. Hancock  
Centre for Microbial Diseases and Immunity Research,  
University of British Columbia,  
2259 Lower Mall Research Station,  
Vancouver, BC V6T 1Z4, Canada  
E-mail: [bob@hancocklab.com](mailto:bob@hancocklab.com)  
Tel: +1 (604) 822 2682; Fax: +1 (604) 827 5566

# Table of contents

---

|                                                                                                                                                                                  |     |
|----------------------------------------------------------------------------------------------------------------------------------------------------------------------------------|-----|
| Table S1. The sequences of the synthetic batenecin peptides and their analogs .....                                                                                              | S3  |
| Figure S1. RP-HPLC spectra of the synthetic batenecin-derived AMPs .....                                                                                                         | S4  |
| Figure S2. Mass spectra of synthetic batenecin-derived AMPs .....                                                                                                                | S12 |
| Figure S3. Ramachandran plots of each amino acid residues in the 1 derived AMPs for the structure with the highest percentage of occurrence in water .....                       | S21 |
| Figure S4. Ramachandran plots of each amino acid residues in the 10 derived AMPs for the structure with the highest percentage of occurrence in water .....                      | S22 |
| Figure S5. RP-HPLC spectra of the reaction mixture of each individual synthetic batenecin-derived AMPs incubated with trypsin.....                                               | S23 |
| Figure S6. Mass spectra of the reaction mixture of each individual synthetic batenecin-derived AMPs incubated with trypsin .....                                                 | S31 |
| Figure S7. The raw ITC data (power vs. time) and the integrated data for injection of the 1 and 10 derived peptides into the calorimeter cell containing trypsin at 310 °K ..... | S58 |
| Figure S8. The representative structure of trypsin used in the docking studies .....                                                                                             | S59 |
| Figure S9. The molecular docked models of synthetic batenecin 1 and its analogues with trypsin.....                                                                              | S60 |
| Figure S10. The molecular docked model of synthetic batenecin 10 and its analogues with trypsin .....                                                                            | S64 |

**Table S1. The sequences of the synthetic battenecin peptides and their analogues**

| Peptide code         | Sequence                                                    |
|----------------------|-------------------------------------------------------------|
| <b>1</b>             | Lys-Arg-Trp-Trp-Lys-Trp-Ile-Arg-Trp-NH <sub>2</sub>         |
| <b>2<sup>a</sup></b> | <u>Lys-Arg-Trp-Trp-Lys-Trp-Ile-Arg-Trp</u> -NH <sub>2</sub> |
| <b>3</b>             | <u>Trp-Arg-Ile-Trp-Lys-Trp-Trp-Arg-Lys</u> -NH <sub>2</sub> |
| <b>4</b>             | Arg-Lys-Trp-Trp-Arg-Trp-Ile-Lys-Trp-NH <sub>2</sub>         |
| <b>5</b>             | Dab-Dab-Trp-Trp-Dab-Trp-Ile-Dab-Trp-NH <sub>2</sub>         |
| <b>6</b>             | Orn-Orn-Trp-Trp-Orn-Trp-Ile-Orn-Trp-NH <sub>2</sub>         |
| <b>7</b>             | Har-Har-Trp-Trp-Har-Trp-Ile-Har-Trp-NH <sub>2</sub>         |
| <b>8</b>             | Dab-Har-Trp-Trp-Dab-Trp-Ile-Har-Trp-NH <sub>2</sub>         |
| <b>9</b>             | Orn-Har-Trp-Trp-Orn-Trp-Ile-Har-Trp-NH <sub>2</sub>         |
| <b>10</b>            | Lys-Arg-Trp-Trp-Lys-Trp-Trp-Arg-Arg-NH <sub>2</sub>         |
| <b>11</b>            | <u>Lys-Arg-Trp-Trp-Lys-Trp-Trp-Arg-Arg</u> -NH <sub>2</sub> |
| <b>12</b>            | <u>Arg-Arg-Trp-Trp-Lys-Trp-Trp-Arg-Lys</u> -NH <sub>2</sub> |
| <b>13</b>            | Arg-Lys-Trp-Trp-Arg-Trp-Trp-Lys-Lys-NH <sub>2</sub>         |
| <b>14</b>            | Dab-Dab-Trp-Trp-Dab-Trp-Trp-Dab-Dab-NH <sub>2</sub>         |
| <b>15</b>            | Orn-Orn-Trp-Trp-Orn-Trp-Trp-Orn-Orn-NH <sub>2</sub>         |
| <b>16</b>            | Har-Har-Trp-Trp-Har-Trp-Trp-Har-Har-NH <sub>2</sub>         |
| <b>17</b>            | Dab-Har-Trp-Trp-Dab-Trp-Trp-Har-Har-NH <sub>2</sub>         |
| <b>18</b>            | Orn-Har-Trp-Trp-Orn-Trp-Trp-Har-Har-NH <sub>2</sub>         |

<sup>a</sup> D-amino acids are underlined.

**Figure S1. RP-HPLC spectra of the synthetic battenecin-derived AMPs**

**1**

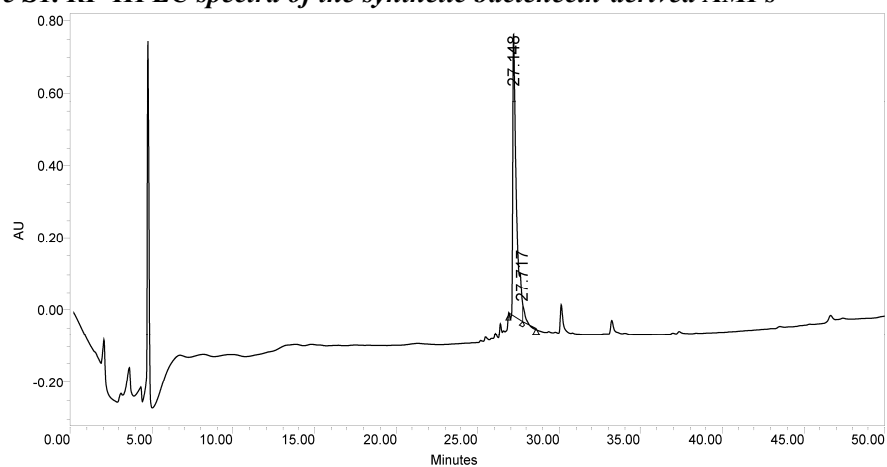

|   | RT<br>(min) | Area<br>(\V*sec) | % Area | Height<br>(\V) | %<br>Height |
|---|-------------|------------------|--------|----------------|-------------|
| 1 | 27.148      | 11883913         | 96.35  | 783609         | 94.49       |
| 2 | 27.717      | 449558           | 3.65   | 45676          | 5.51        |

**4**

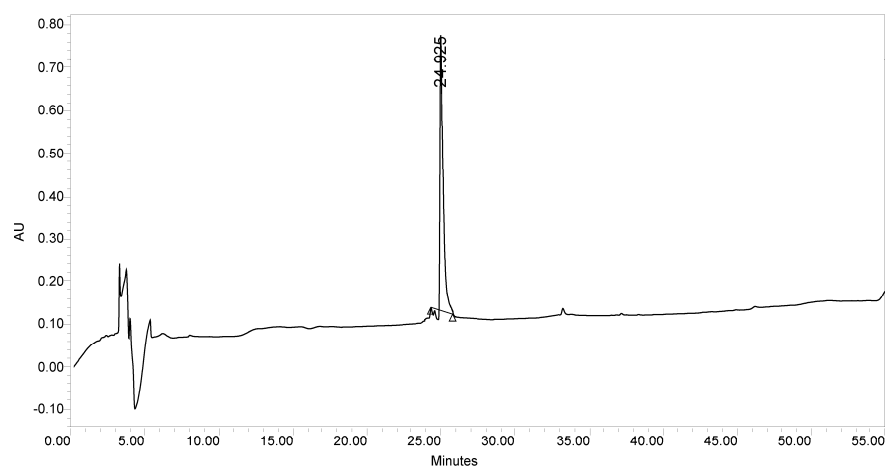

|   | RT<br>(min) | Area<br>(\V*sec) | % Area | Height<br>(\V) | %<br>Height |
|---|-------------|------------------|--------|----------------|-------------|
| 1 | 24.925      | 12428055         | 100.00 | 650492         | 100.00      |



5

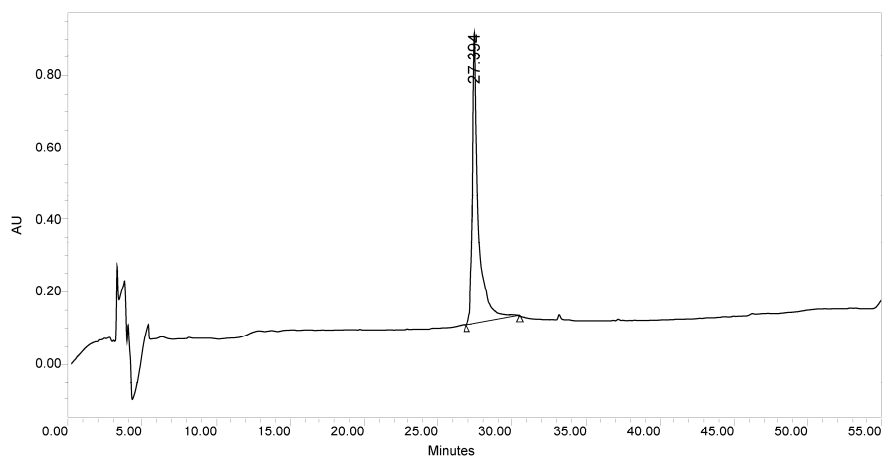

|   | RT<br>(min) | Area<br>(V*sec) | % Area | Height<br>(V) | % Height |
|---|-------------|-----------------|--------|---------------|----------|
| 1 | 27.394      | 31186141        | 100.00 | 809985        | 100.00   |

6

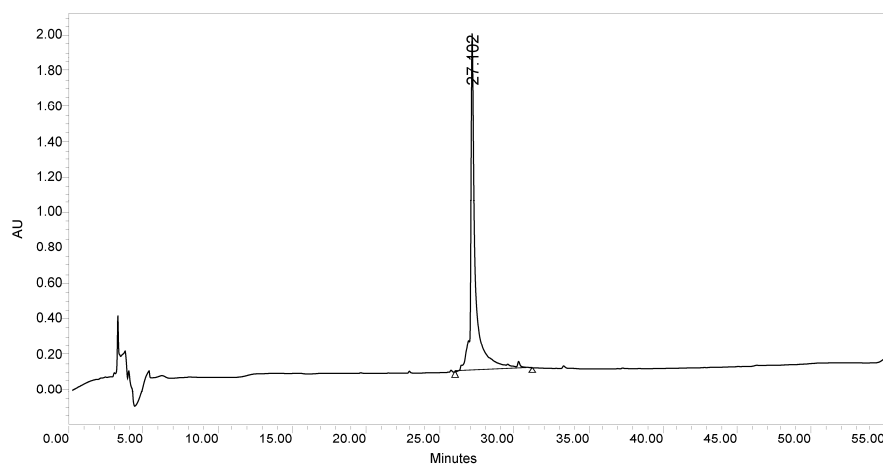

|   | RT<br>(min) | Area<br>(V*sec) | % Area | Height<br>(V) | % Height |
|---|-------------|-----------------|--------|---------------|----------|
| 1 | 27.102      | 41467130        | 100.00 | 1902051       | 100.00   |

7

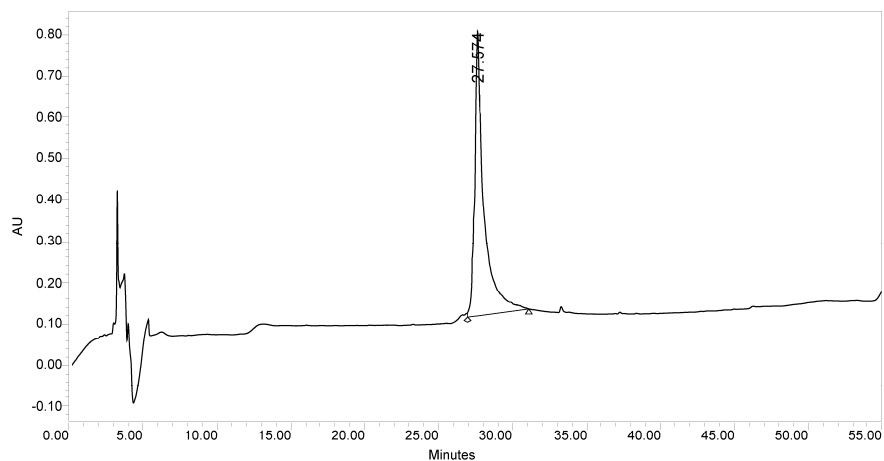

|   | RT (min) | Area (V*sec) | % Area | Height (V) | % Height |
|---|----------|--------------|--------|------------|----------|
| 1 | 27.574   | 36064407     | 100.00 | 690649     | 100.00   |

8

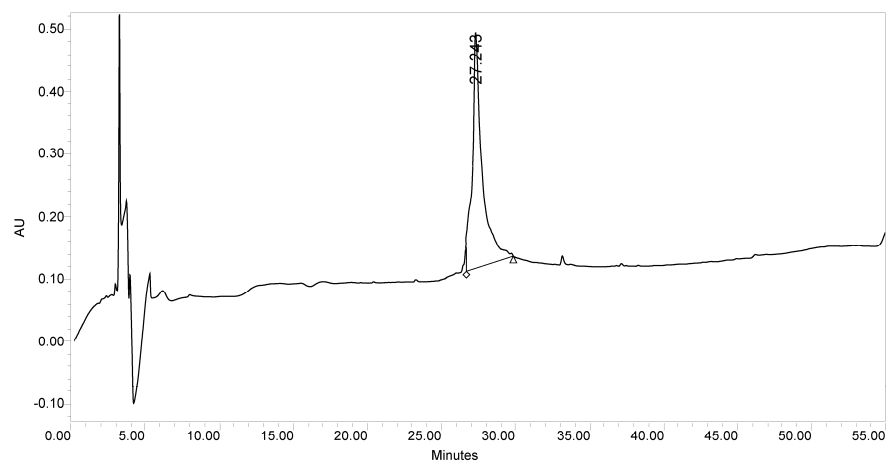

|   | RT (min) | Area (V*sec) | % Area | Height (V) | % Height |
|---|----------|--------------|--------|------------|----------|
| 1 | 27.243   | 19238552     | 100.00 | 379505     | 100.00   |

9

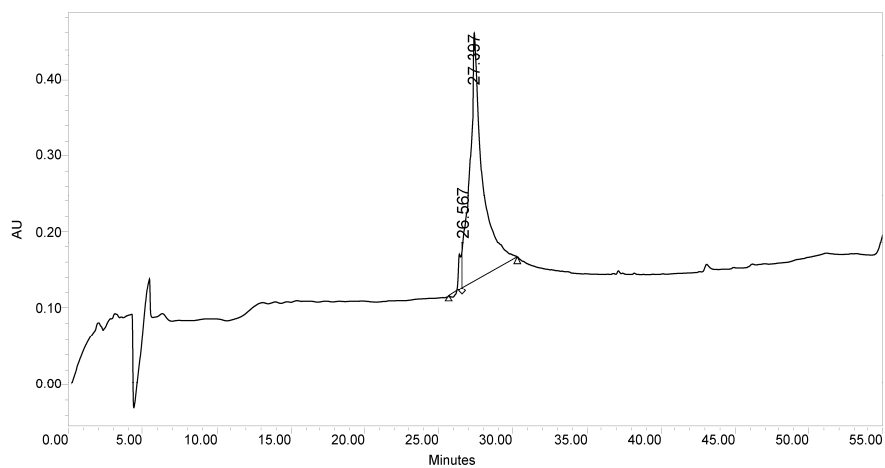

|   | RT<br>(min) | Area<br>(V*sec) | % Area | Height<br>(V) | % Height |
|---|-------------|-----------------|--------|---------------|----------|
| 1 | 26.567      | 975534          | 4.79   | 60729         | 15.68    |
| 2 | 27.397      | 19388831        | 95.21  | 326690        | 84.32    |

10

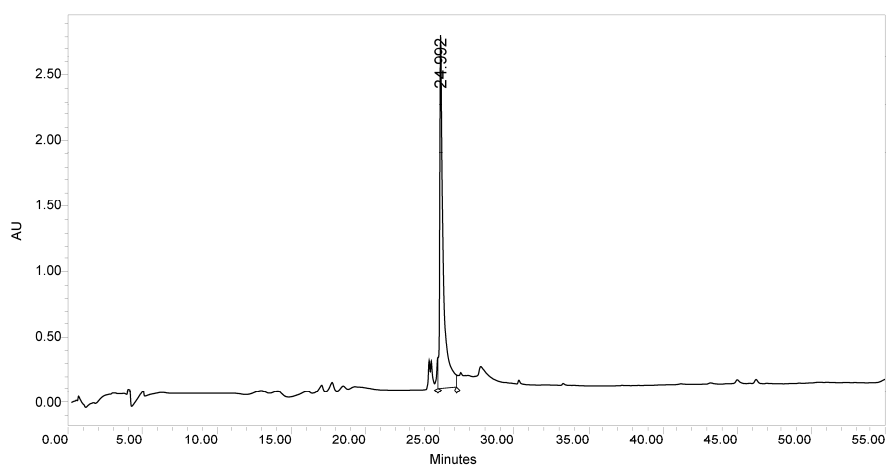

|   | RT<br>(min) | Area<br>(V*sec) | % Area | Height<br>(V) | % Height |
|---|-------------|-----------------|--------|---------------|----------|
| 1 | 24.992      | 43856370        | 100.00 | 2732073       | 100.00   |

11

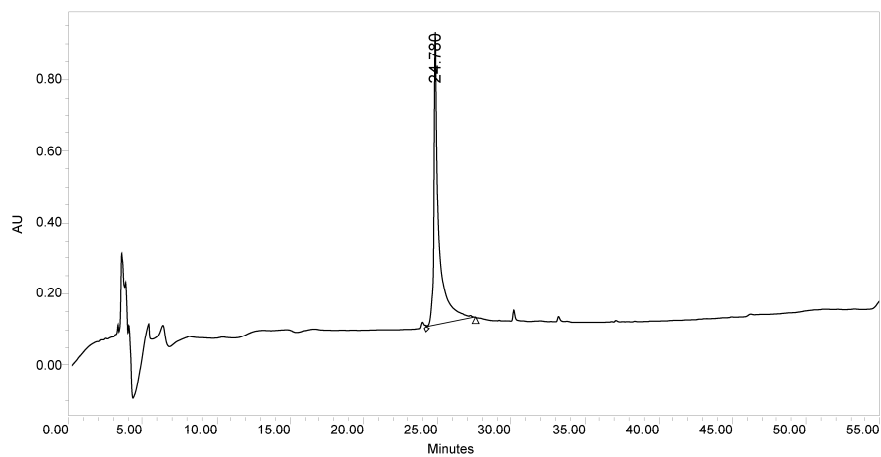

|   | RT<br>(min) | Area<br>(\V*sec) | % Area | Height<br>(\V) | % Height |
|---|-------------|------------------|--------|----------------|----------|
| 1 | 24.780      | 19350236         | 100.00 | 820719         | 100.00   |

12

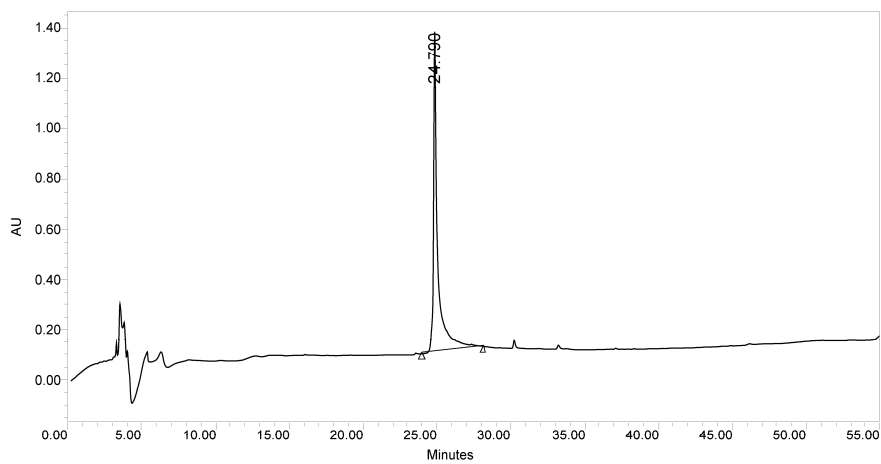

|   | RT<br>(min) | Area<br>(\V*sec) | % Area | Height<br>(\V) | % Height |
|---|-------------|------------------|--------|----------------|----------|
| 1 | 24.790      | 25655886         | 100.00 | 1278975        | 100.00   |

13

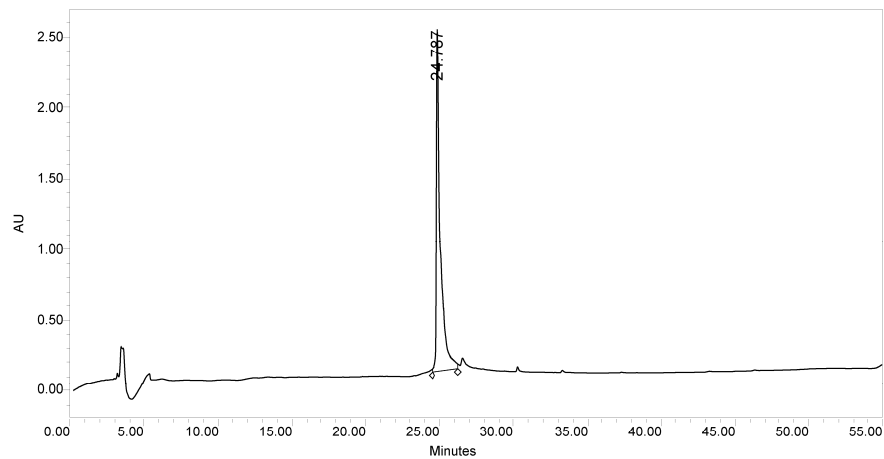

|   | RT<br>(min) | Area<br>(\V*sec) | % Area | Height<br>(\V) | % Height |
|---|-------------|------------------|--------|----------------|----------|
| 1 | 24.787      | 48101892         | 100.00 | 2437496        | 100.00   |

14

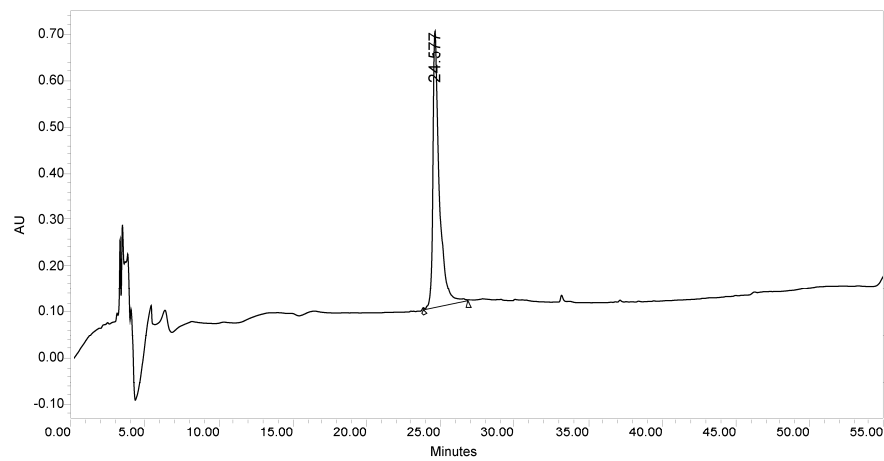

|   | RT<br>(min) | Area<br>(\V*sec) | % Area | Height<br>(\V) | % Height |
|---|-------------|------------------|--------|----------------|----------|
| 1 | 24.577      | 24794329         | 100.00 | 599472         | 100.00   |

15

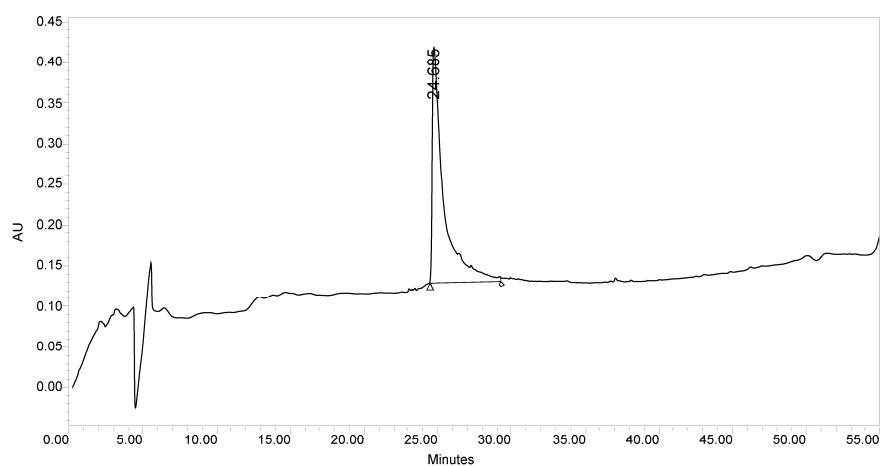

|   | RT<br>(min) | Area<br>(V*sec) | % Area | Height<br>(V) | % Height |
|---|-------------|-----------------|--------|---------------|----------|
| 1 | 24.685      | 15778358        | 100.00 | 290499        | 100.00   |

16

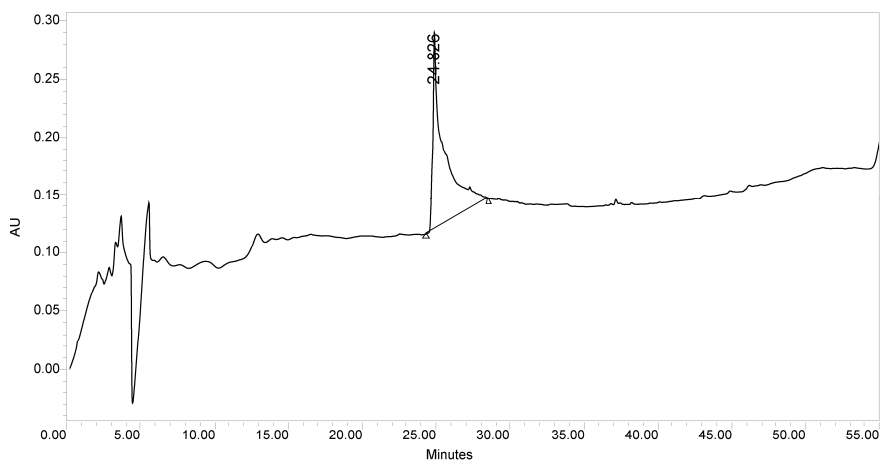

|   | RT<br>(min) | Area<br>(V*sec) | % Area | Height<br>(V) | % Height |
|---|-------------|-----------------|--------|---------------|----------|
| 1 | 24.826      | 9022603         | 100.00 | 170362        | 100.00   |

17

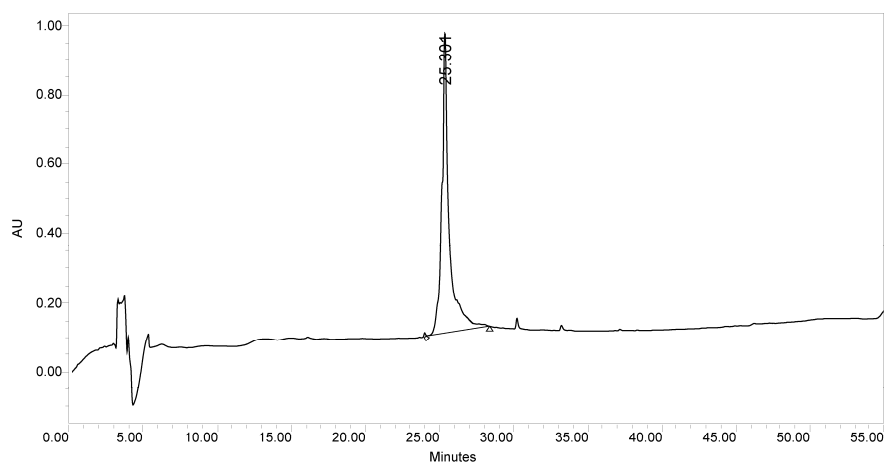

|   | RT<br>(min) | Area<br>(\V*sec) | % Area | Height<br>(\V) | %<br>Height |
|---|-------------|------------------|--------|----------------|-------------|
| 1 | 25.301      | 31638622         | 100.00 | 866338         | 100.00      |

18

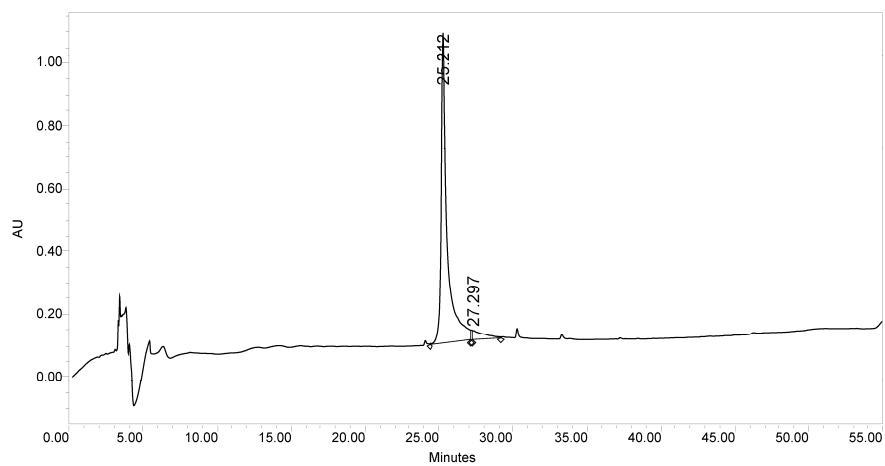

|   | RT<br>(min) | Area<br>(\V*sec) | % Area | Height<br>(\V) | %<br>Height |
|---|-------------|------------------|--------|----------------|-------------|
| 1 | 25.212      | 27873057         | 94.05  | 989471         | 96.82       |
| 2 | 27.297      | 1764761          | 5.95   | 32505          | 3.18        |

**Figure S2. Mass spectra of synthetic battenecin-derived AMPs.** The values are monoisotopic masses in positive mode.

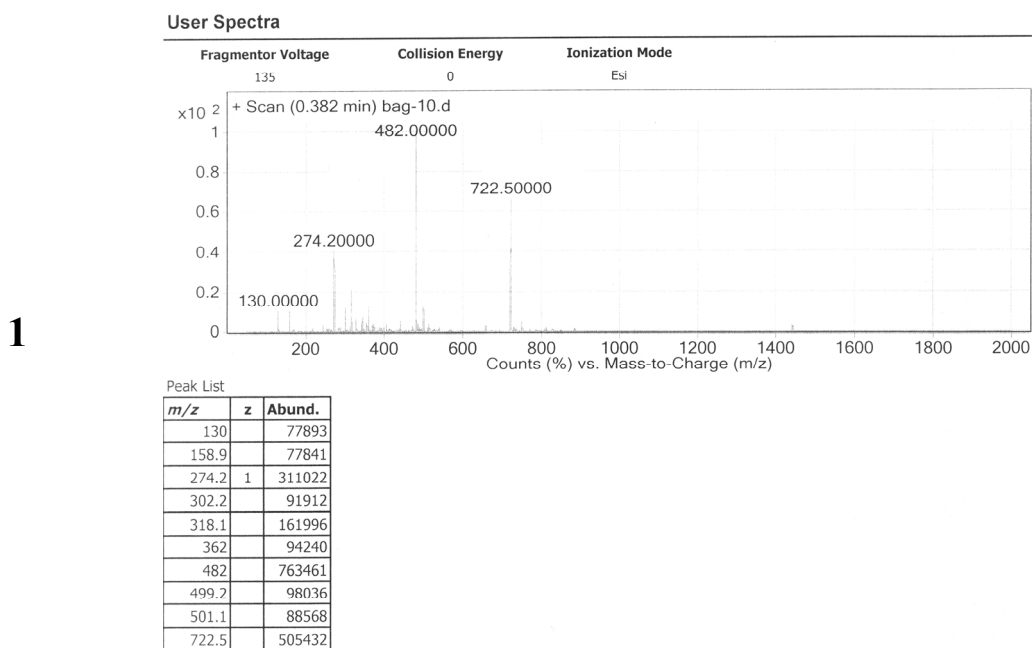

$$[M+H^{2+}]^{2+} = 722.4^a, [M+H^{3+}]^{3+} = 482.0$$

<sup>a</sup> These values are the calculated mass values for the respective peptides.

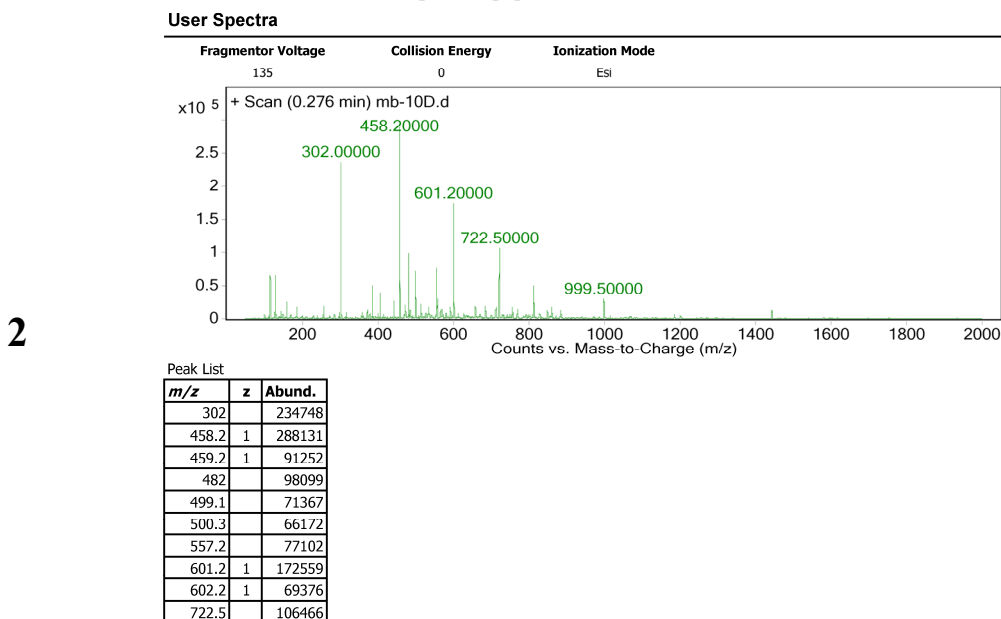

$$[M+H^{2+}]^{2+} = 722.4, [M+H^{3+}]^{3+} = 482.0, [M+2TFA+H^{3+}]^{3+} = 557.9^b$$

<sup>b</sup> The calculated masses may reflect the mass of the peptides with TFA adduct ion; e.g.,  $[M+xTFA+nH]^n+$ , where x is the number of TFA adduct ion, and n represents multiple-charge ionization of peptides from protonation. The monoisotopic mass of TFA is 113.99 Da.



3

# User Spectra

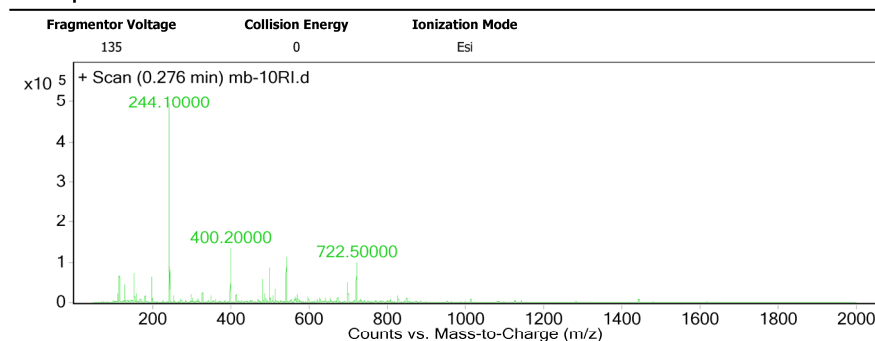

## Peak List

| m/z   | z | Abund. |
|-------|---|--------|
| 116.1 |   | 63614  |
| 154   |   | 70912  |
| 199   |   | 61460  |
| 244.1 | 1 | 495043 |
| 245.1 | 1 | 80116  |
| 400.2 | 1 | 133999 |
| 482   |   | 56105  |
| 499.2 |   | 85819  |
| 543.2 | 1 | 111402 |
| 722.5 |   | 99026  |

$$[M+H^{2+}]^{2+} = 722.4, [M+H^{3+}]^{3+} = 482.0$$

4

# User Spectra

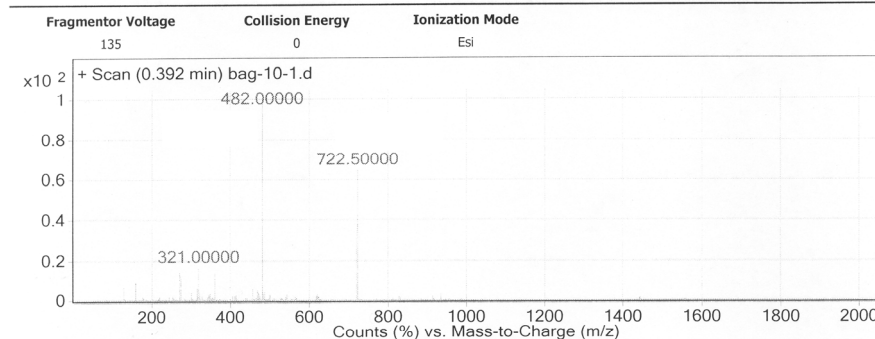

## Peak List

| m/z   | Abund. |
|-------|--------|
| 130   | 64455  |
| 159   | 86977  |
| 274.1 | 135066 |
| 318.2 | 62181  |
| 321   | 156159 |
| 361.8 | 123469 |
| 458.3 | 53090  |
| 471.1 | 50700  |
| 482   | 924981 |
| 722.5 | 598406 |

$$[M+H^{2+}]^{2+} = 722.4, [M+H^{3+}]^{3+} = 482.0$$

5

## User Spectra

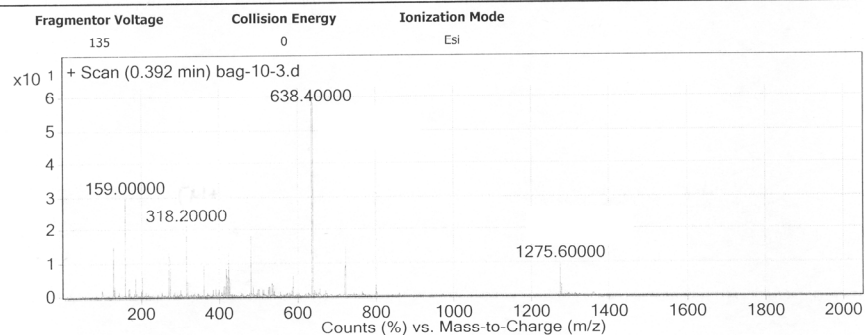

Peak List

| m/z    | z | Abund. |
|--------|---|--------|
| 130    |   | 138730 |
| 159    | 1 | 273182 |
| 274.2  |   | 122067 |
| 318.2  | 1 | 194631 |
| 362.1  |   | 87964  |
| 425.9  |   | 123172 |
| 482.1  |   | 167167 |
| 638.4  |   | 555045 |
| 722.5  |   | 137598 |
| 1275.6 | 1 | 88806  |

$$[M+H^{1+}]^{1+} = 1275.8, [M+H^{2+}]^{2+} = 638.4, [M+H^{3+}]^{3+} = 425.9$$

6

## User Spectra

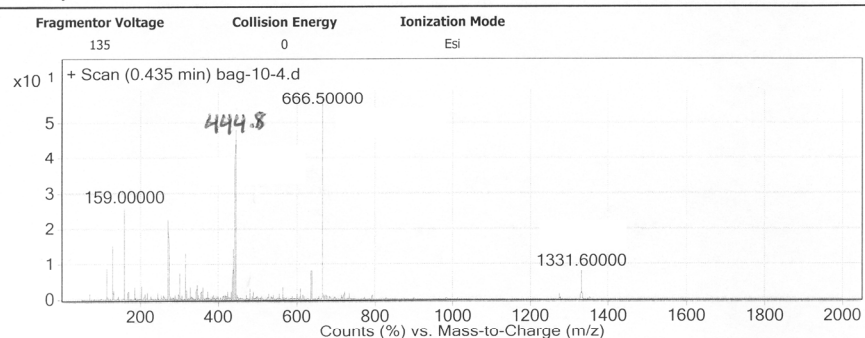

Peak List

| m/z    | z | Abund. |
|--------|---|--------|
| 115    |   | 81442  |
| 130    |   | 144632 |
| 159    | 1 | 240092 |
| 274.1  |   | 211178 |
| 318.1  |   | 122252 |
| 439    |   | 133479 |
| 444.6  |   | 449990 |
| 638.5  |   | 75134  |
| 666.5  |   | 524785 |
| 1331.6 | 1 | 72481  |

$$[M+H^{1+}]^{1+} = 1331.8, [M+H^{2+}]^{2+} = 666.4, [M+H^{3+}]^{3+} = 444.6$$

7

## User Spectra

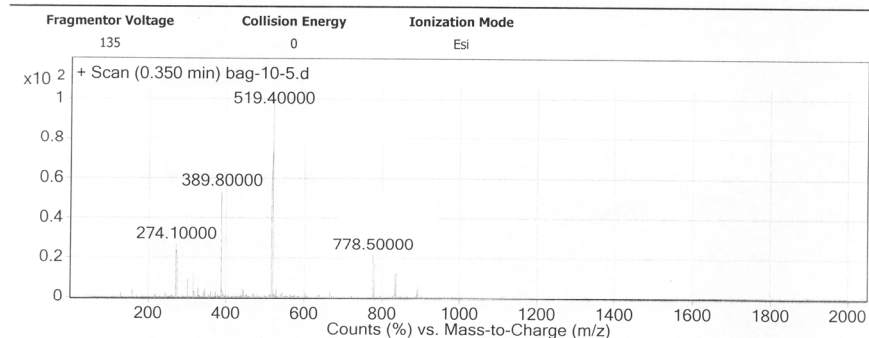

Peak List

| m/z   | Abund. |
|-------|--------|
| 274.1 | 271624 |
| 302.2 | 92172  |
| 318.1 | 129798 |
| 389.8 | 531360 |
| 519.4 | 996489 |
| 778.5 | 213639 |
| 835.5 | 123206 |
| 892.5 | 58584  |

$$[M+H^{2+}]^{2+} = 778.4, [M+H^{3+}]^{3+} = 519.3, [M+H^{4+}]^{4+} = 389.7$$

8

## User Spectra

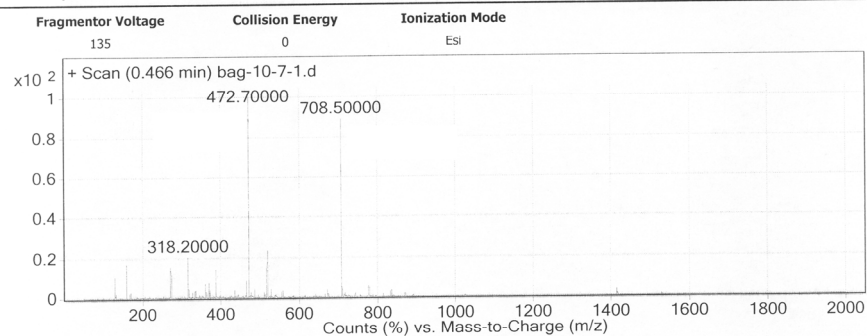

Peak List

| m/z   | Abund. |
|-------|--------|
| 130   | 71799  |
| 159   | 117997 |
| 274.2 | 109054 |
| 318.2 | 142649 |
| 372.2 | 50444  |
| 389.9 | 97588  |
| 467   | 58062  |
| 472.7 | 685163 |
| 519.4 | 164256 |
| 708.5 | 612096 |

$$[M+H^{2+}]^{2+} = 708.4, [M+H^{3+}]^{3+} = 472.6$$

9

## User Spectra

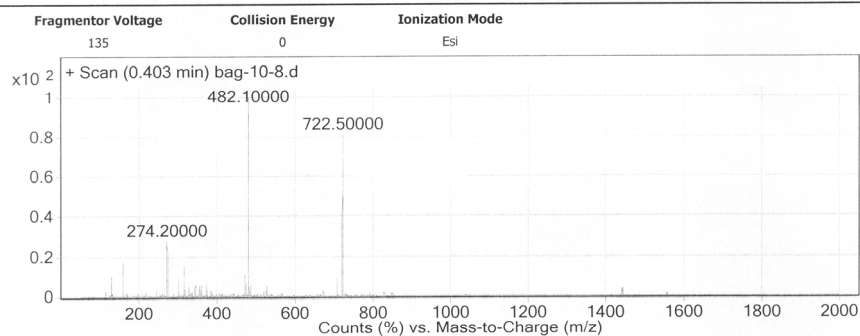

Peak List

| m/z   | Abund. |
|-------|--------|
| 130   | 76560  |
| 159   | 130697 |
| 274.2 | 212212 |
| 302.1 | 65525  |
| 318.2 | 118411 |
| 472.6 | 80871  |
| 476.3 | 51301  |
| 482.1 | 761430 |
| 708.5 | 70294  |
| 722.5 | 617793 |

$$[M+H^{2+}]^{2+} = 722.4, [M+H^{3+}]^{3+} = 481.9$$

10

## User Spectra

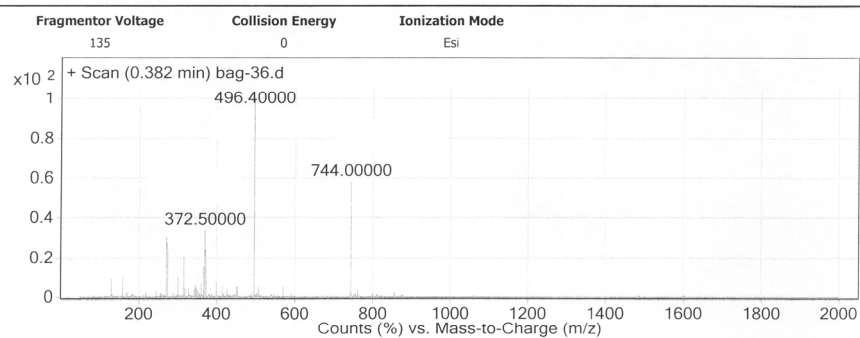

Peak List

| m/z   | z | Abund. |
|-------|---|--------|
| 130   |   | 38998  |
| 159   |   | 44139  |
| 274.2 | 1 | 124167 |
| 302.2 |   | 39967  |
| 318.2 |   | 85810  |
| 368.3 |   | 66223  |
| 372.5 |   | 141317 |
| 400.7 |   | 32226  |
| 496.4 |   | 413198 |
| 744   |   | 241710 |

$$[M+H^{2+}]^{2+} = 743.9, [M+H^{3+}]^{3+} = 496.3, [M+H^{4+}]^{4+} = 372.5$$

11

## User Spectra

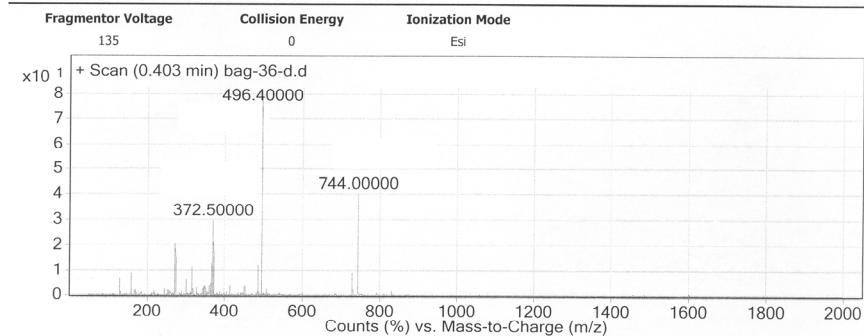

## Peak List

| m/z   | Abund. |
|-------|--------|
| 129.9 | 64249  |
| 159   | 83677  |
| 274.2 | 189870 |
| 318.2 | 103588 |
| 368.3 | 120922 |
| 372.5 | 269382 |
| 487.1 | 109489 |
| 496.4 | 719993 |
| 730   | 83255  |
| 744   | 364734 |

$$[M+H^{2+}]^{2+} = 743.9, [M+H^{3+}]^{3+} = 496.3, [M+H^{4+}]^{4+} = 372.5$$

12

## User Spectra

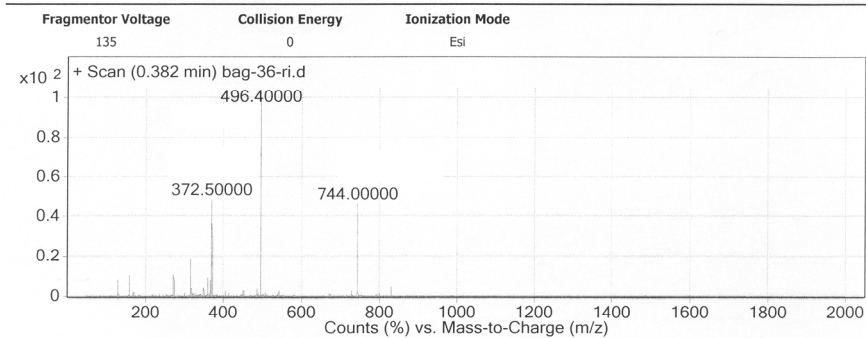

## Peak List

| m/z   | Abund.  |
|-------|---------|
| 130   | 83148   |
| 159   | 102751  |
| 274.1 | 109280  |
| 318.2 | 189455  |
| 362.2 | 96044   |
| 368.3 | 83049   |
| 372.5 | 494158  |
| 496.4 | 1024810 |
| 744   | 472133  |

$$[M+H^{2+}]^{2+} = 743.9, [M+H^{3+}]^{3+} = 496.3, [M+H^{4+}]^{4+} = 372.5$$

13

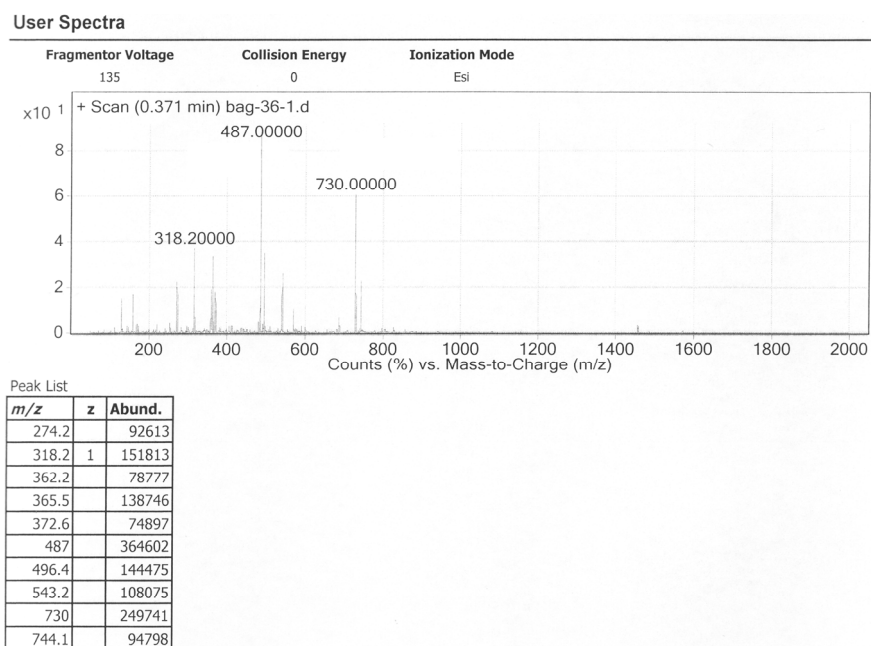

$$[M+H^{2+}]^{2+} = 729.9, [M+H^{3+}]^{3+} = 487.0, [M+H^{4+}]^{4+} = 365.5$$

14

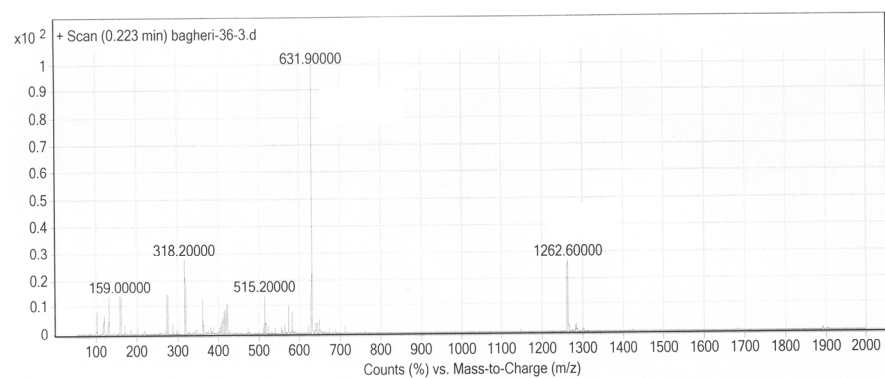

$$[M+H^{1+}]^{1+} = 1262.8, [M+H^{2+}]^{2+} = 631.9$$

15

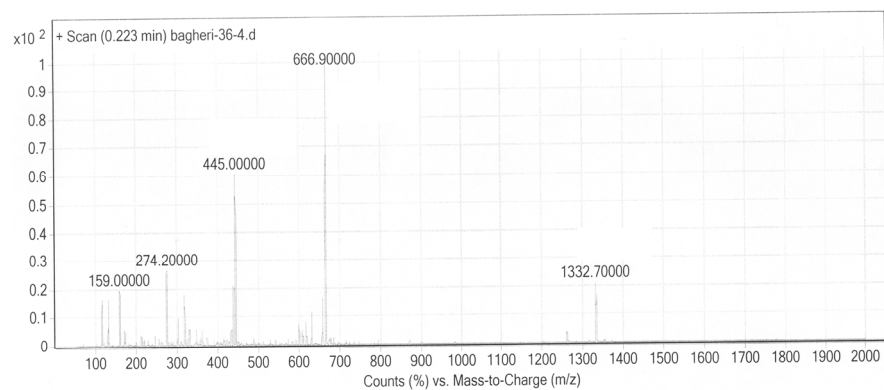

$$[M+H^{1+}]^{1+} = 1332.8, [M+H^{2+}]^{2+} = 666.9, [M+H^{4+}]^{4+} = 444.9$$

16

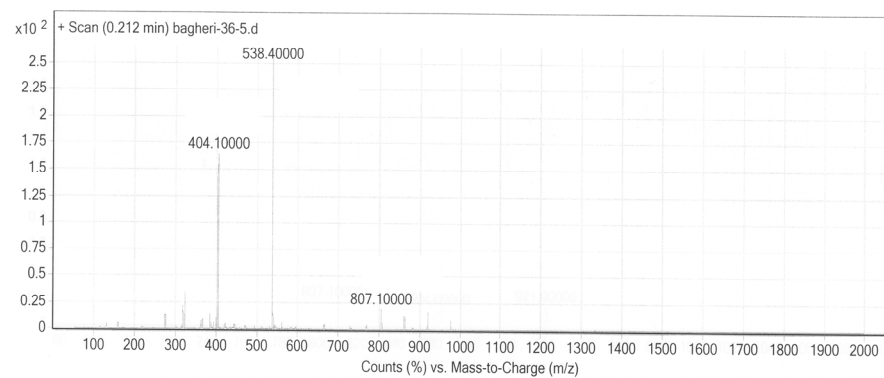

$$[M+H^{2+}]^{2+} = 806.9, [M+H^{3+}]^{3+} = 538.4, [M+H^{4+}]^{4+} = 404.0$$

17

## User Spectra

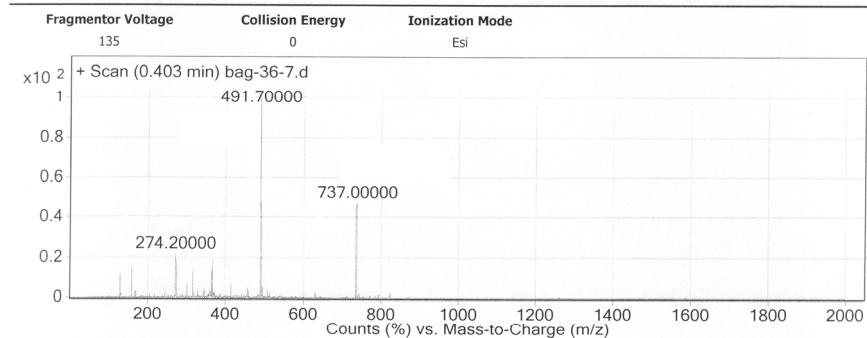

Peak List

| m/z   | Abund. |
|-------|--------|
| 130   | 104002 |
| 159   | 128531 |
| 274.2 | 198299 |
| 302.2 | 61607  |
| 318.2 | 117253 |
| 364.7 | 119193 |
| 369   | 175936 |
| 415.8 | 59778  |
| 491.7 | 912051 |
| 737   | 432823 |

$$[M+H^{2+}]^{2+} = 736.9, [M+H^{3+}]^{3+} = 491.6, [M+H^{4+}]^{4+} = 369.0$$

18

## User Spectra

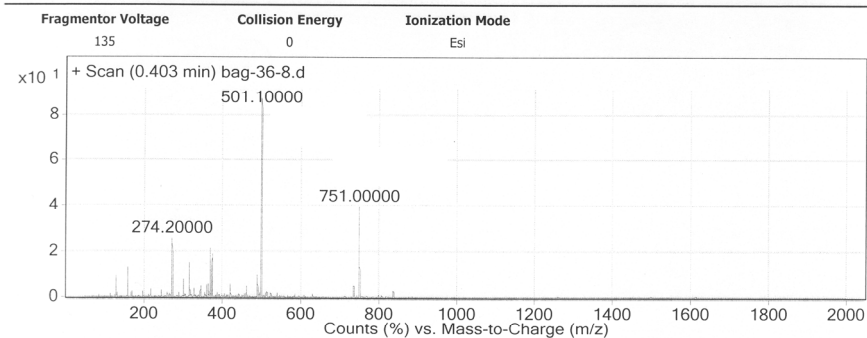

Peak List

| m/z   | z | Abund. |
|-------|---|--------|
| 130   |   | 81220  |
| 159   |   | 121537 |
| 274.2 | 1 | 231058 |
| 302.2 |   | 68492  |
| 318.2 |   | 138385 |
| 371.8 |   | 195480 |
| 376   |   | 170543 |
| 491.7 |   | 85886  |
| 501.1 |   | 795609 |
| 751   |   | 362752 |

$$[M+H^{2+}]^{2+} = 750.9, [M+H^{3+}]^{3+} = 501.0, [M+H^{4+}]^{4+} = 376.0$$



**Figure S3. Ramachandran plots of each amino acid residues in the 1 derived AMPs for the structure with the highest percentage of occurrence in water.** The three-letter amino acid codes from left to right represent the residues in the sequences starting from the 2<sup>nd</sup> residue at the peptide *N*-terminal to the 8<sup>th</sup> at the *C*-terminal.

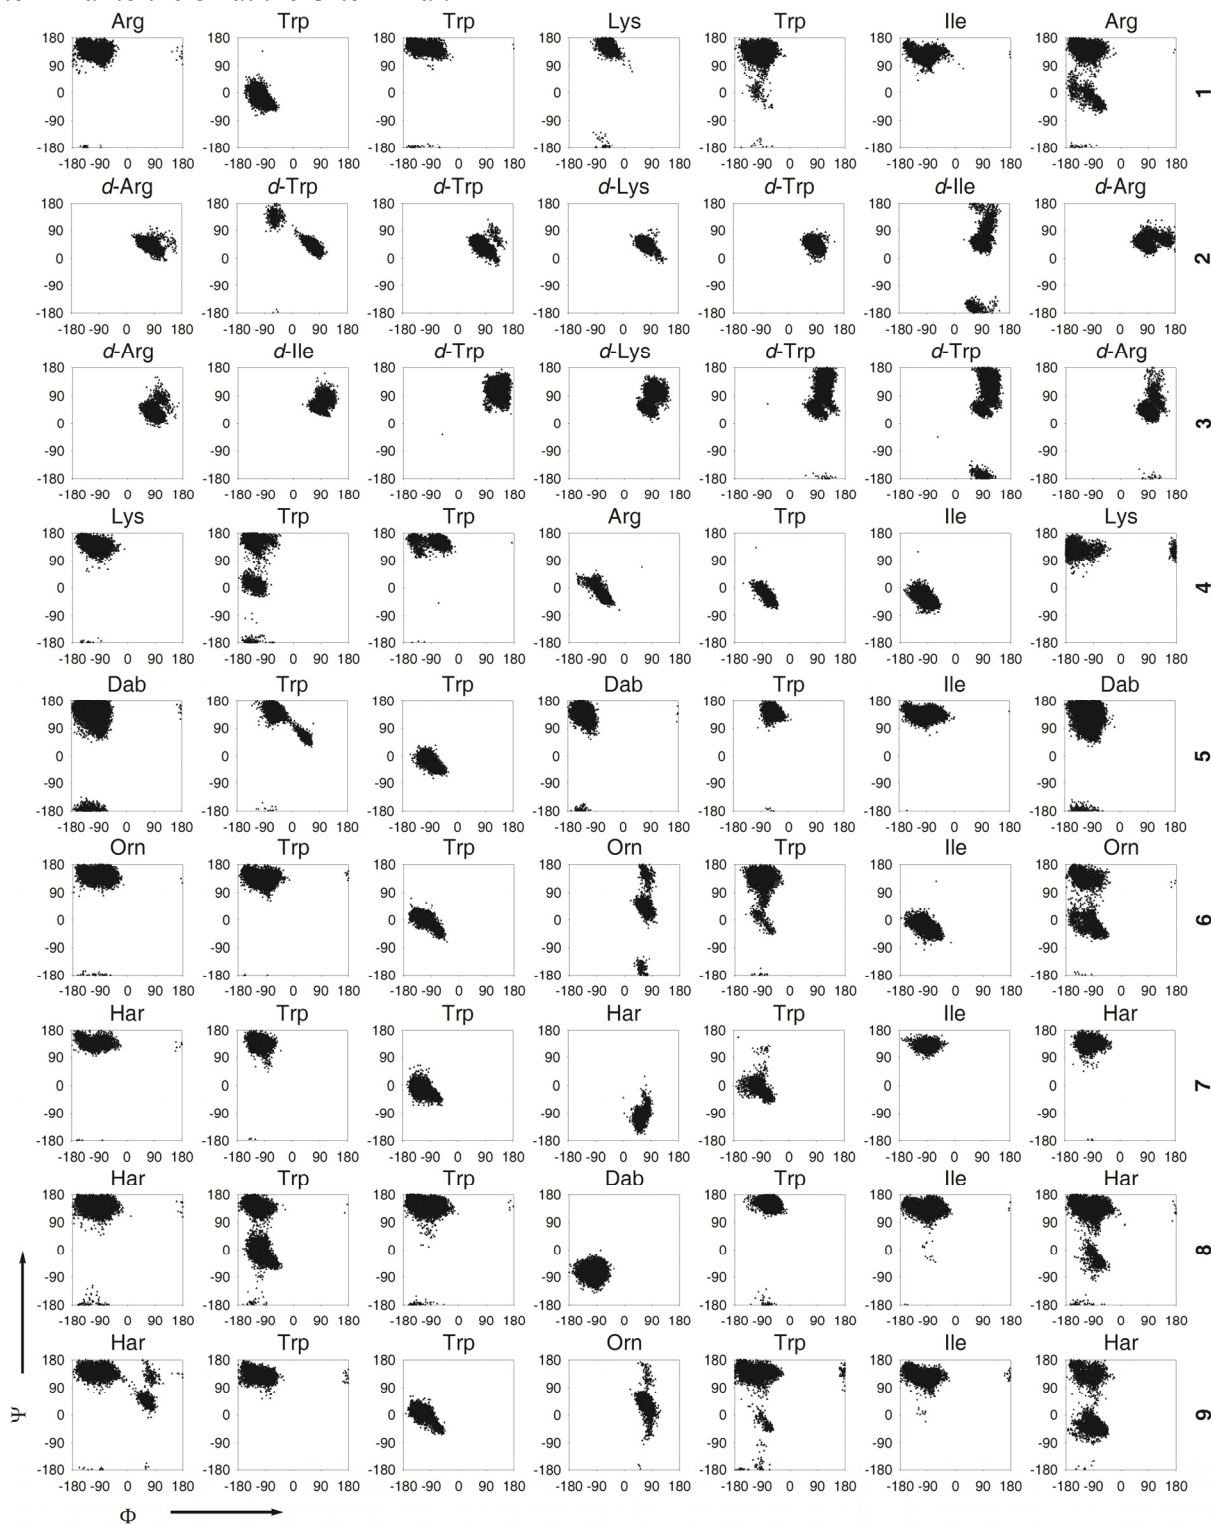

**Figure S4. Ramachandran plots of each amino acid residues in the 10 derived AMPs for the structure with the highest percentage of occurrence in water.** The three-letter amino acid codes from left to right represent the residues in the sequences starting from the 2<sup>nd</sup> residue at the peptide *N*-terminal to the 8<sup>th</sup> at the *C*-terminal.

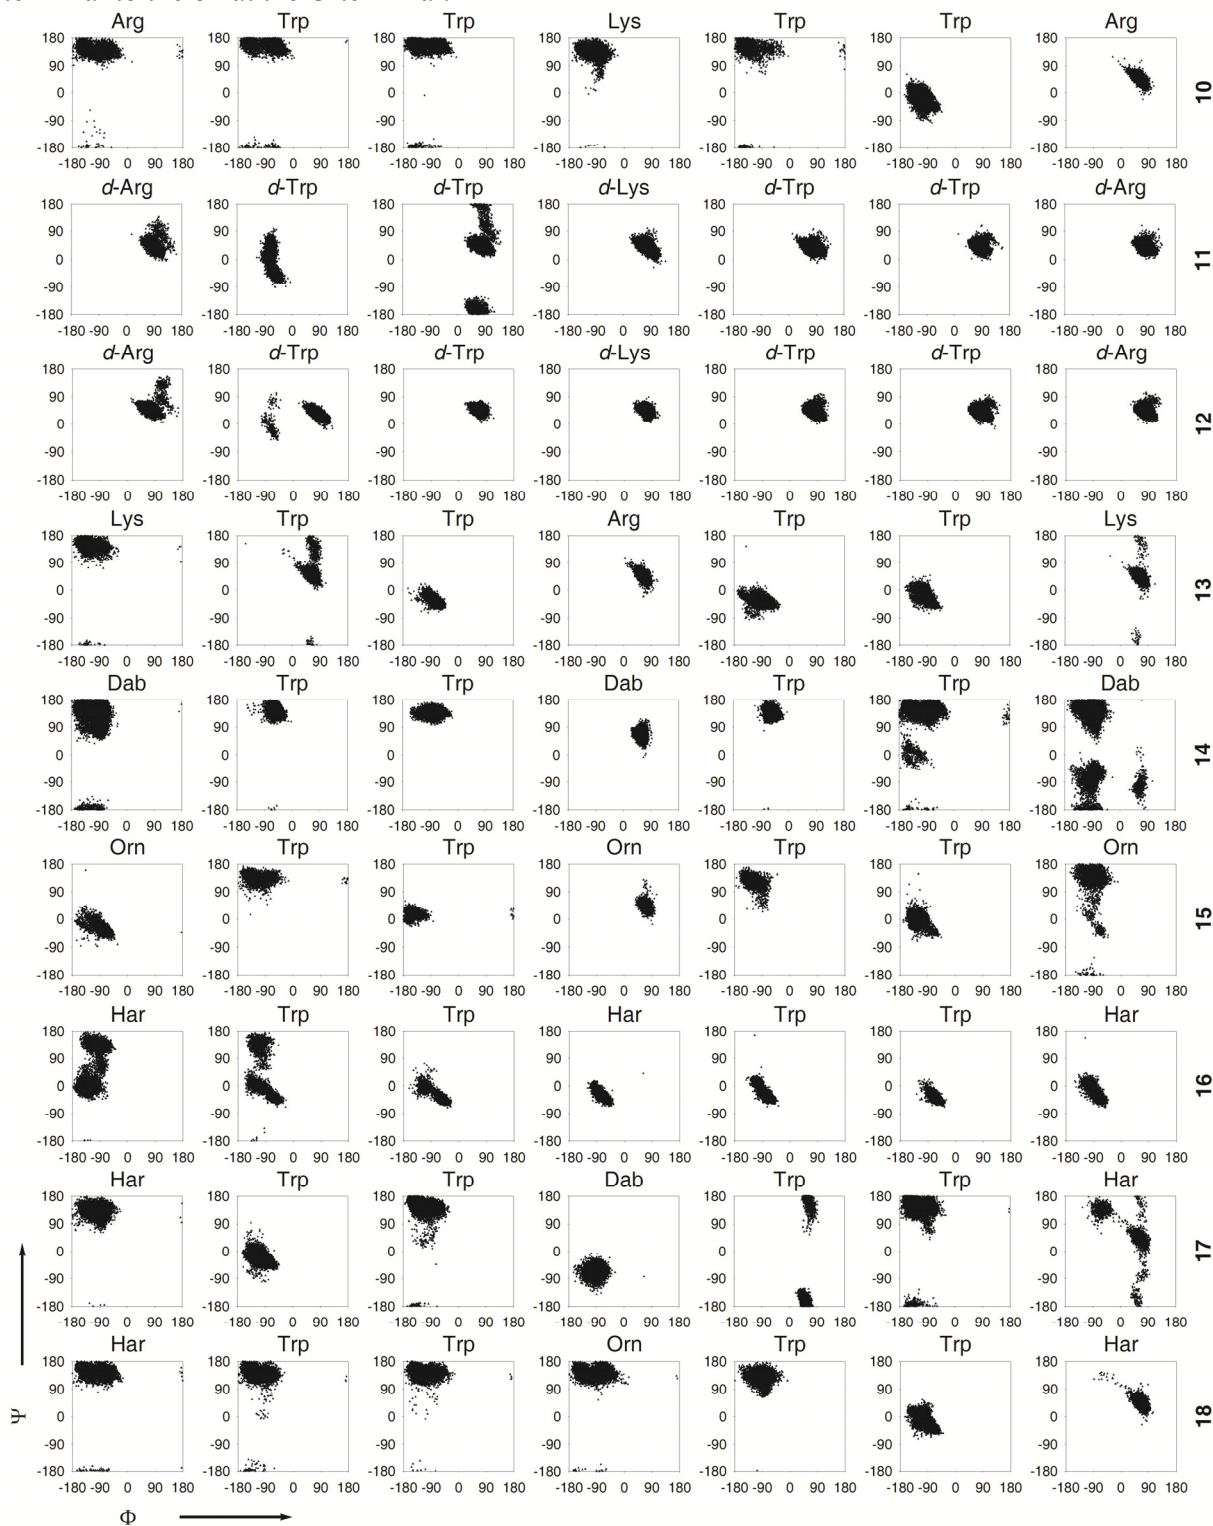

Figure S5. RP-HPLC spectra of the reaction mixture of each individual synthetic bactenecin-derived AMPs incubated with trypsin. Left and right spectra were recorded after 2 h and 24 h incubation, respectively.

1

Not determined

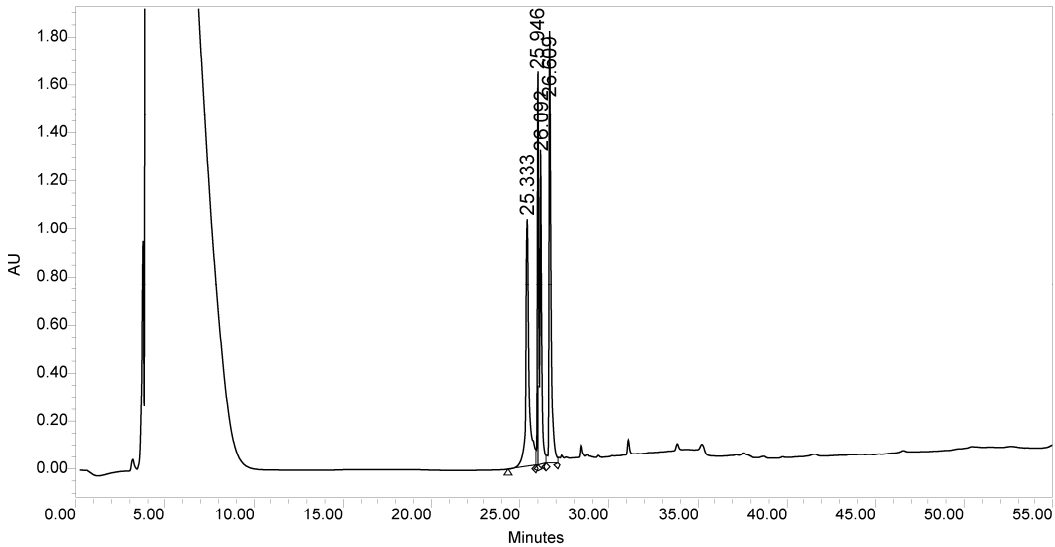

|   | RT<br>(min) | Area<br>(V*sec) | % Area | Height<br>(V) | %<br>Height |
|---|-------------|-----------------|--------|---------------|-------------|
| 1 | 25.333      | 13001191        | 29.48  | 1031427       | 17.80       |
| 2 | 25.946      | 8405109         | 19.06  | 1625079       | 28.05       |
| 3 | 26.092      | 8621698         | 19.55  | 1310912       | 22.62       |
| 4 | 26.609      | 14070998        | 31.91  | 1826946       | 31.53       |

4

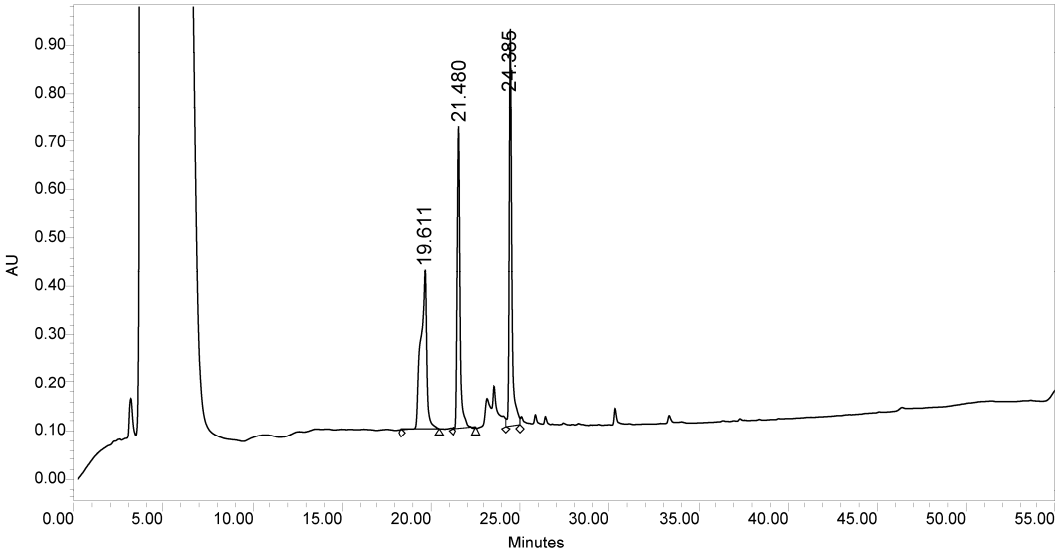

|   | RT<br>(min) | Area<br>(V*sec) | % Area | Height<br>(V) | %<br>Height |
|---|-------------|-----------------|--------|---------------|-------------|
| 1 | 19.611      | 7670579         | 33.04  | 330780        | 18.58       |
| 2 | 21.480      | 7060761         | 30.42  | 626051        | 35.17       |
| 3 | 24.385      | 8483124         | 36.54  | 823271        | 46.25       |

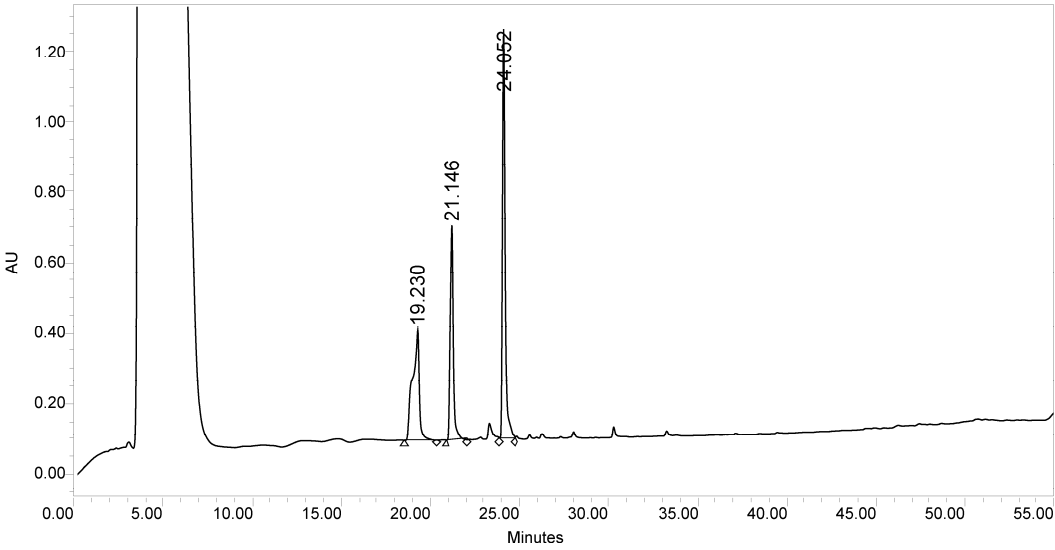

|   | RT<br>(min) | Area<br>(V*sec) | % Area | Height<br>(V) | %<br>Height |
|---|-------------|-----------------|--------|---------------|-------------|
| 1 | 19.230      | 8154749         | 28.69  | 312060        | 14.97       |
| 2 | 21.146      | 7554488         | 26.58  | 608124        | 29.17       |
| 3 | 24.052      | 12711148        | 44.73  | 1164805       | 55.87       |

5

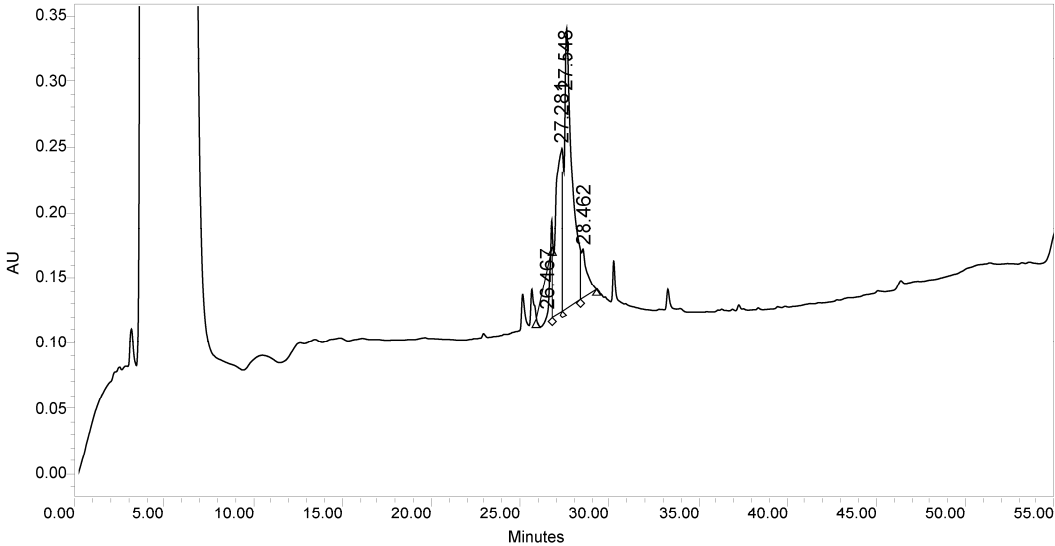

|   | RT<br>(min) | Area<br>(V*sec) | % Area | Height<br>(V) | %<br>Height |
|---|-------------|-----------------|--------|---------------|-------------|
| 1 | 26.467      | 1011273         | 8.63   | -30416        | 7.41        |
| 2 | 27.281      | 3645777         | 31.12  | 126062        | 30.72       |
| 3 | 27.548      | 6209156         | 53.00  | 215372        | 52.49       |
| 4 | 28.462      | 849982          | 7.25   | 38479         | 9.38        |

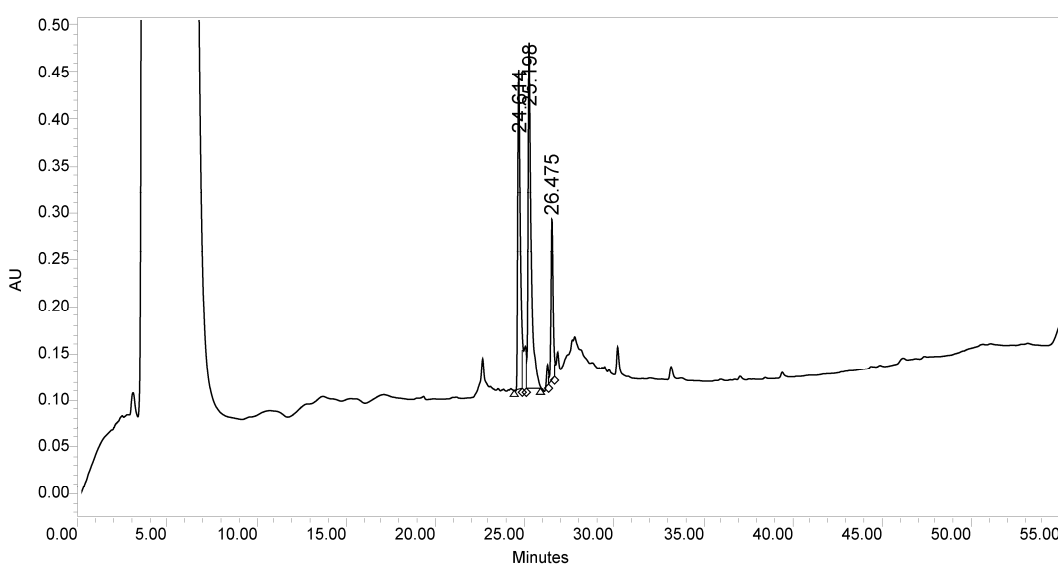

|   | RT<br>(min) | Area<br>(V*sec) | % Area | Height<br>(V) | %<br>Height |
|---|-------------|-----------------|--------|---------------|-------------|
| 1 | 24.614      | 3583893         | 37.68  | 342403        | 38.58       |
| 2 | 25.198      | 4421324         | 46.48  | 369775        | 41.66       |
| 3 | 26.475      | 1507111         | 15.84  | 175323        | 19.75       |

6

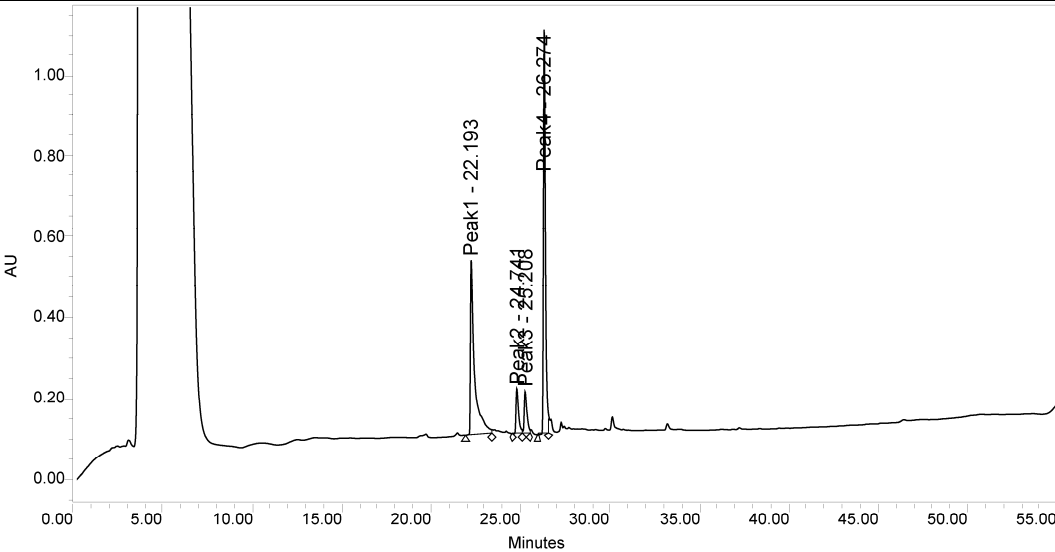

|   | Peak<br>Name | RT<br>(min) | Area<br>(V*sec) | % Area | Height<br>(V) | %<br>Height |
|---|--------------|-------------|-----------------|--------|---------------|-------------|
| 1 | Peak1        | 22.193      | 7135925         | 40.26  | 437584        | 26.26       |
| 2 | Peak2        | 24.741      | 1246444         | 7.03   | 115327        | 6.92        |
| 3 | Peak3        | 25.208      | 1183228         | 6.68   | 107751        | 6.47        |
| 4 | Peak4        | 26.274      | 8160046         | 46.04  | 1006000       | 60.36       |

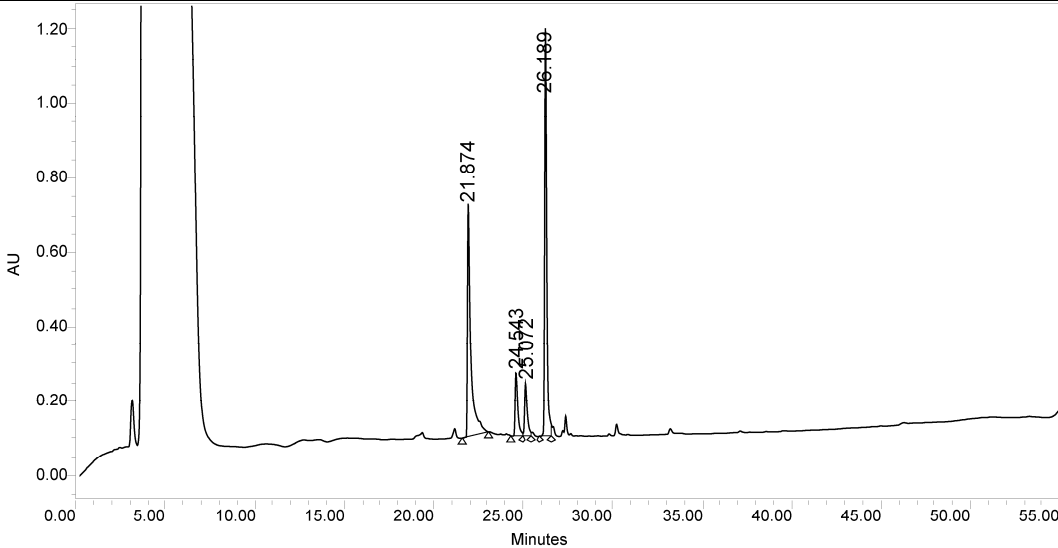

|   | RT<br>(min) | Area<br>(V*sec) | % Area | Height<br>(V) | %<br>Height |
|---|-------------|-----------------|--------|---------------|-------------|
| 1 | 21.874      | 8212554         | 39.66  | 630385        | 30.90       |
| 2 | 24.543      | 1749270         | 8.45   | 169927        | 8.33        |
| 3 | 25.072      | 1530707         | 7.39   | 140956        | 6.91        |
| 4 | 26.189      | 9216205         | 44.50  | 1098972       | 53.86       |

7

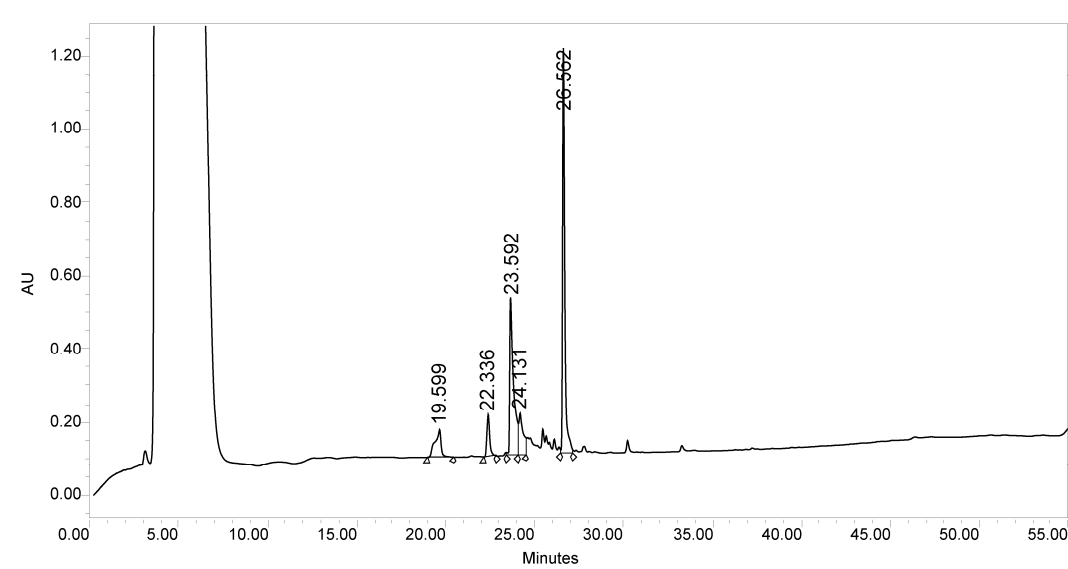

|   | RT<br>(min) | Area<br>(V*sec) | % Area | Height<br>(V) | %<br>Height |
|---|-------------|-----------------|--------|---------------|-------------|
| 1 | 19.599      | 1838440         | 8.43   | 75763         | 4.08        |
| 2 | 22.336      | 1284397         | 5.89   | 114686        | 6.17        |
| 3 | 23.592      | 6627827         | 30.39  | 440533        | 23.70       |
| 4 | 24.131      | 2104371         | 9.65   | 116065        | 6.24        |
| 5 | 26.562      | 9957598         | 45.65  | 1111509       | 59.80       |

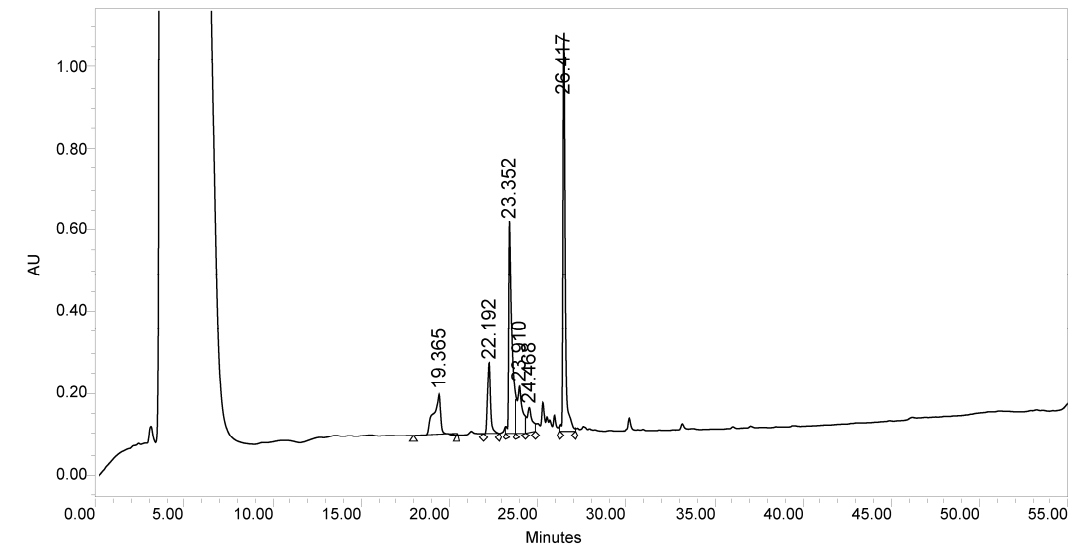

|   | RT<br>(min) | Area<br>(V*sec) | % Area | Height<br>(V) | %<br>Height |
|---|-------------|-----------------|--------|---------------|-------------|
| 1 | 19.365      | 2849178         | 11.73  | 99453         | 5.10        |
| 2 | 22.192      | 2166225         | 8.92   | 175777        | 9.01        |
| 3 | 23.352      | 7024702         | 28.92  | 520351        | 26.66       |
| 4 | 23.910      | 2240115         | 9.22   | 115563        | 5.92        |
| 5 | 24.468      | 1324039         | 5.45   | 62887         | 3.22        |
| 6 | 26.417      | 8688648         | 35.77  | 977804        | 50.10       |

8

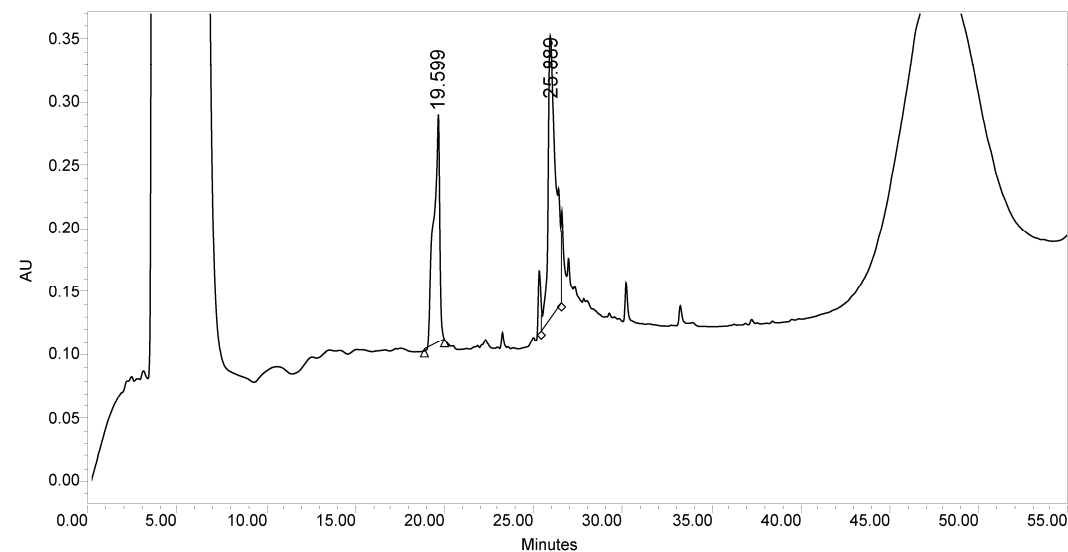

|   | RT<br>(min) | Area<br>(V*sec) | % Area | Height<br>(V) | %<br>Height |
|---|-------------|-----------------|--------|---------------|-------------|
| 1 | 19.599      | 4343694         | 38.17  | 182080        | 44.67       |
| 2 | 25.889      | 7036083         | 61.83  | 225524        | 55.33       |

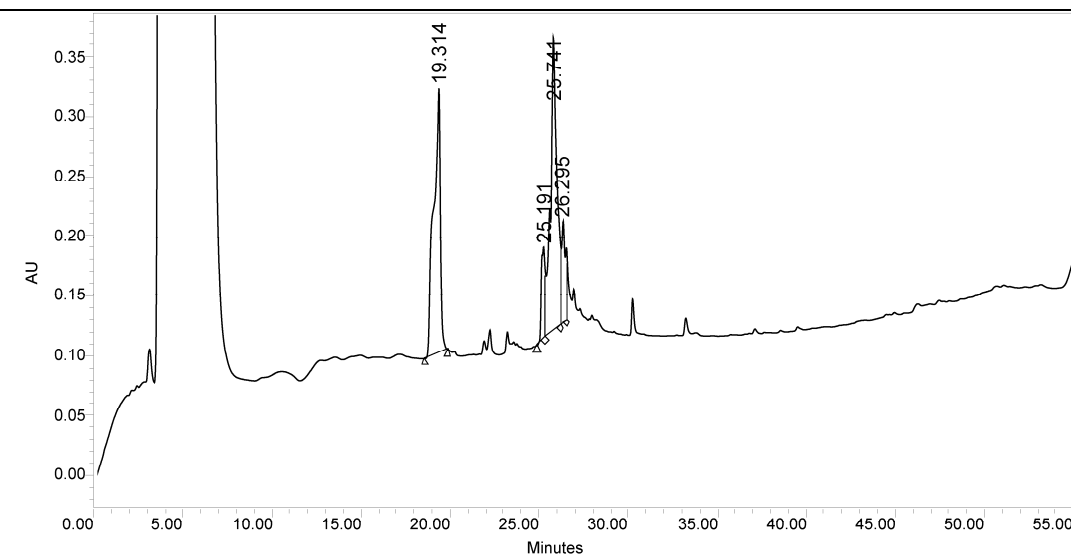

|   | RT<br>(min) | Area<br>(V*sec) | % Area | Height<br>(V) | %<br>Height |
|---|-------------|-----------------|--------|---------------|-------------|
| 1 | 19.314      | 5810375         | 39.59  | 221698        | 35.11       |
| 2 | 25.191      | 1270333         | 8.66   | 77277         | 12.24       |
| 3 | 25.741      | 6210353         | 42.31  | 246802        | 39.09       |
| 4 | 26.295      | 1386016         | 9.44   | 85613         | 13.56       |

9

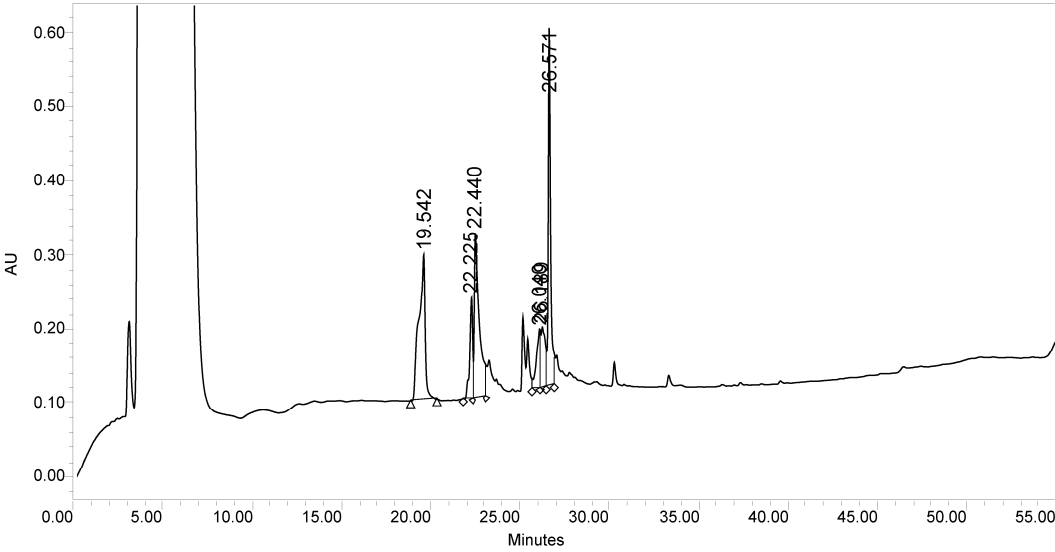

|   | RT<br>(min) | Area<br>(V*sec) | % Area | Height<br>(V) | % Height |
|---|-------------|-----------------|--------|---------------|----------|
| 1 | 19.542      | 4824240         | 26.56  | 197840        | 16.41    |
| 2 | 22.225      | 1562293         | 8.60   | 136987        | 11.37    |
| 3 | 22.440      | 4512258         | 24.84  | 224417        | 18.62    |
| 4 | 26.040      | 1294132         | 7.13   | 79748         | 6.62     |
| 5 | 26.189      | 1308022         | 7.20   | 81545         | 6.77     |
| 6 | 26.571      | 4662302         | 25.67  | 484746        | 40.22    |

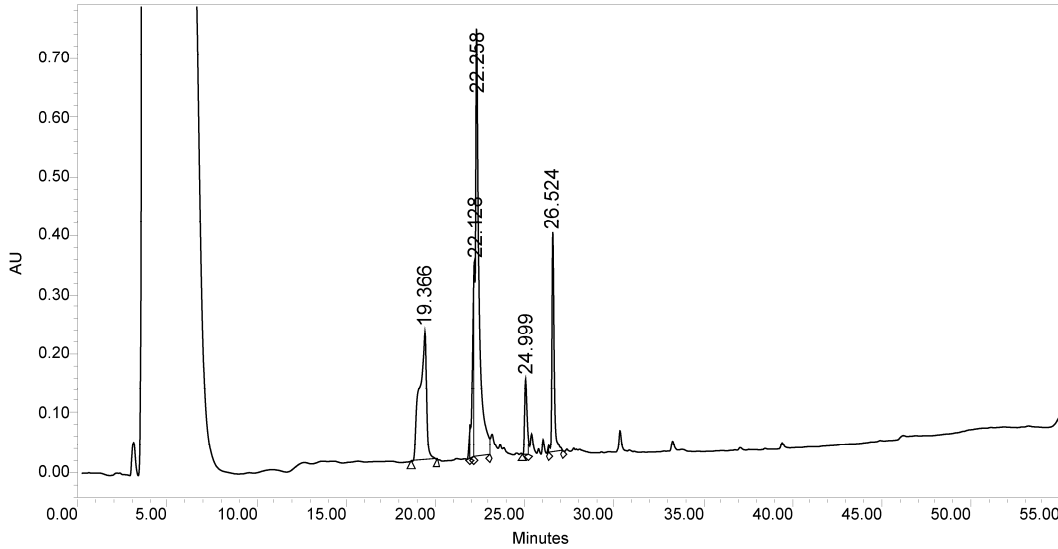

|   | RT<br>(min) | Area<br>(V*sec) | % Area | Height<br>(V) | % Height |
|---|-------------|-----------------|--------|---------------|----------|
| 1 | 19.366      | 5909889         | 25.37  | 218908        | 12.25    |
| 2 | 22.128      | 2837168         | 12.18  | 332424        | 18.61    |
| 3 | 22.258      | 9929396         | 42.63  | 731003        | 40.92    |
| 4 | 24.999      | 1272203         | 5.46   | 127670        | 7.15     |
| 5 | 26.524      | 3342753         | 14.35  | 376363        | 21.07    |

10

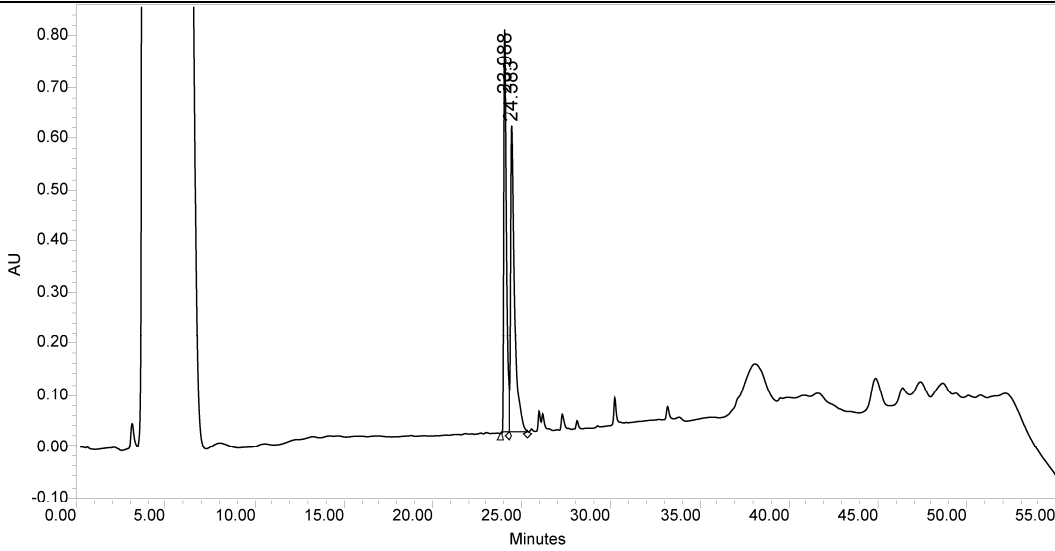

|   | RT<br>(min) | Area<br>(V*sec) | % Area | Height<br>(V) | % Height |
|---|-------------|-----------------|--------|---------------|----------|
| 1 | 23.988      | 8347216         | 47.05  | 788496        | 56.86    |
| 2 | 24.383      | 9393036         | 52.95  | 598115        | 43.14    |

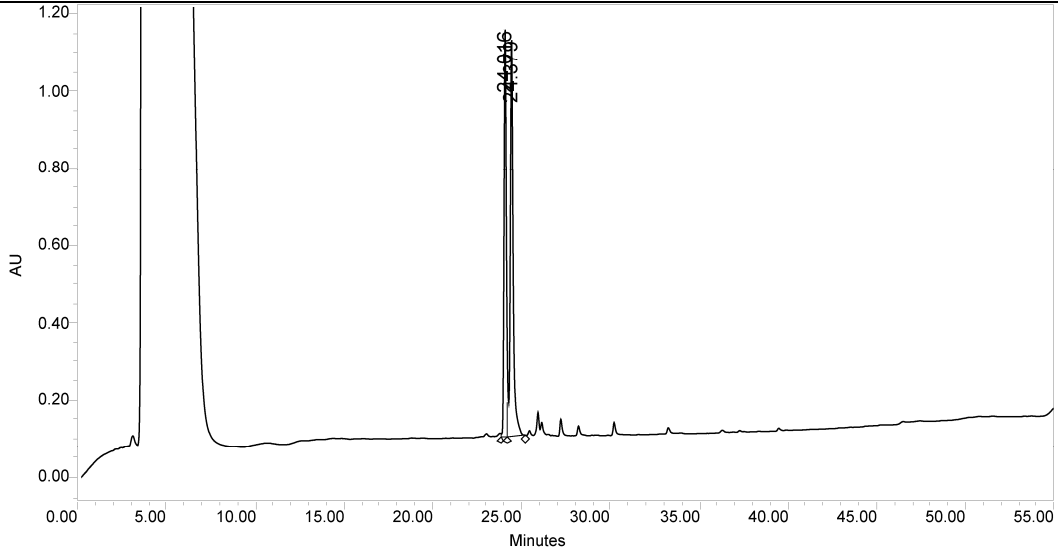

|   | RT<br>(min) | Area<br>(V*sec) | % Area | Height<br>(V) | % Height |
|---|-------------|-----------------|--------|---------------|----------|
| 1 | 24.016      | 9992755         | 46.19  | 1053376       | 50.58    |
| 2 | 24.379      | 11642428        | 53.81  | 1029111       | 49.42    |

11

Not determined

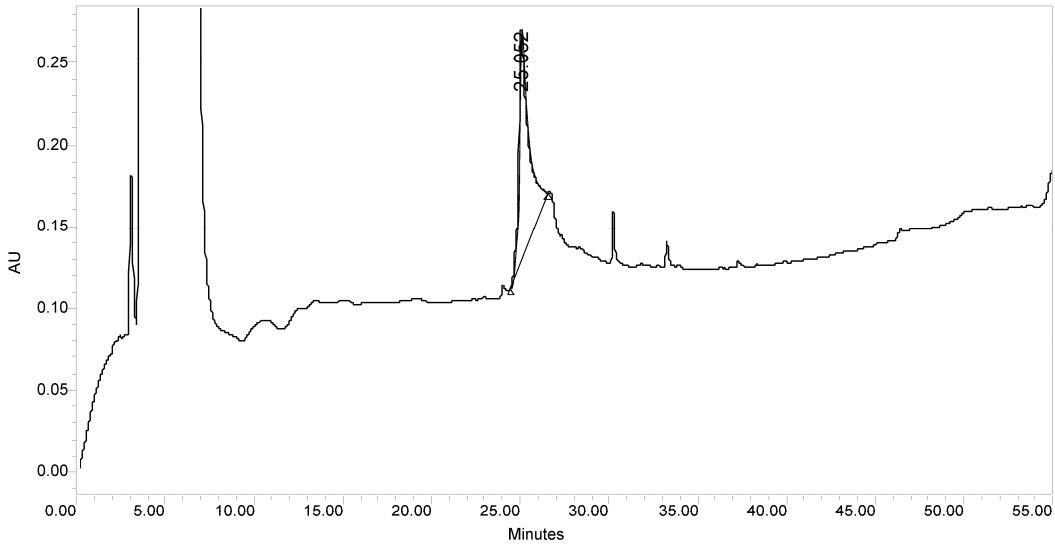

|   | RT<br>(min) | Area<br>(V*sec) | % Area | Height<br>(V) | % Height |
|---|-------------|-----------------|--------|---------------|----------|
| 1 | 25.052      | 5455848         | 100.00 | 142245        | 100.00   |

12

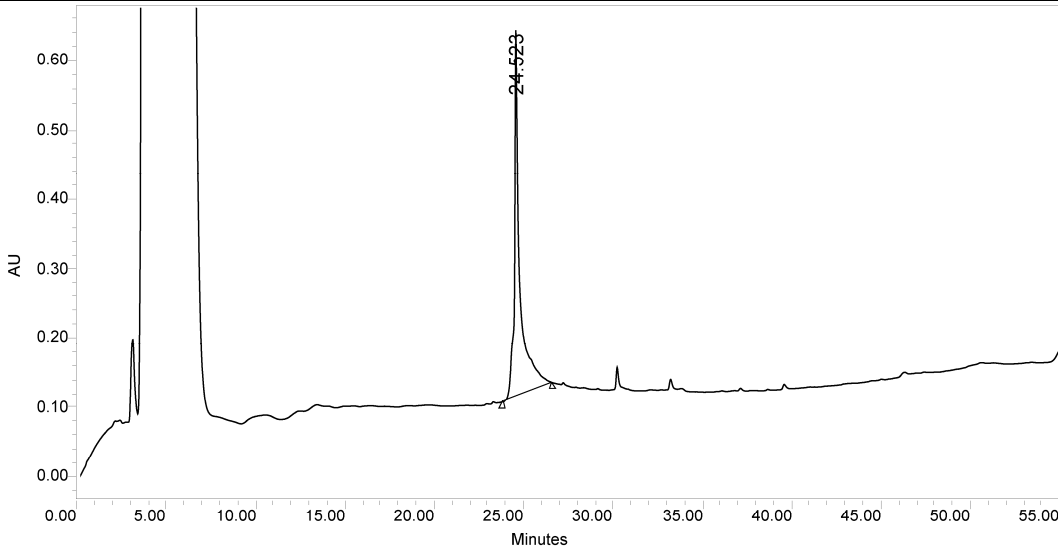

|   | RT<br>(min) | Area<br>(V*sec) | % Area | Height<br>(V) | % Height |
|---|-------------|-----------------|--------|---------------|----------|
| 1 | 24.523      | 11192574        | 100.00 | 530664        | 100.00   |

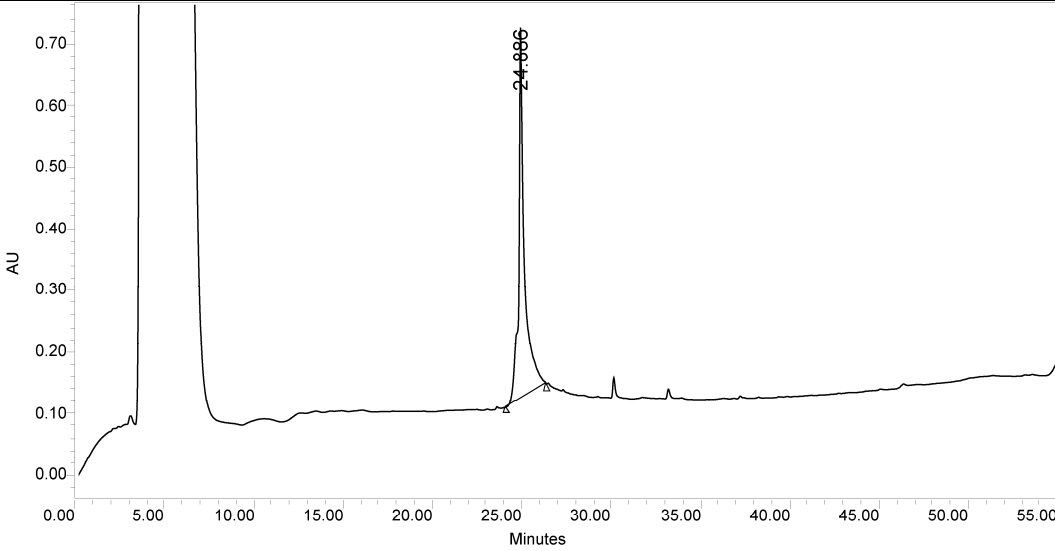

|   | RT<br>(min) | Area<br>(V*sec) | % Area | Height<br>(V) | % Height |
|---|-------------|-----------------|--------|---------------|----------|
| 1 | 24.886      | 13375788        | 100.00 | 601280        | 100.00   |

13

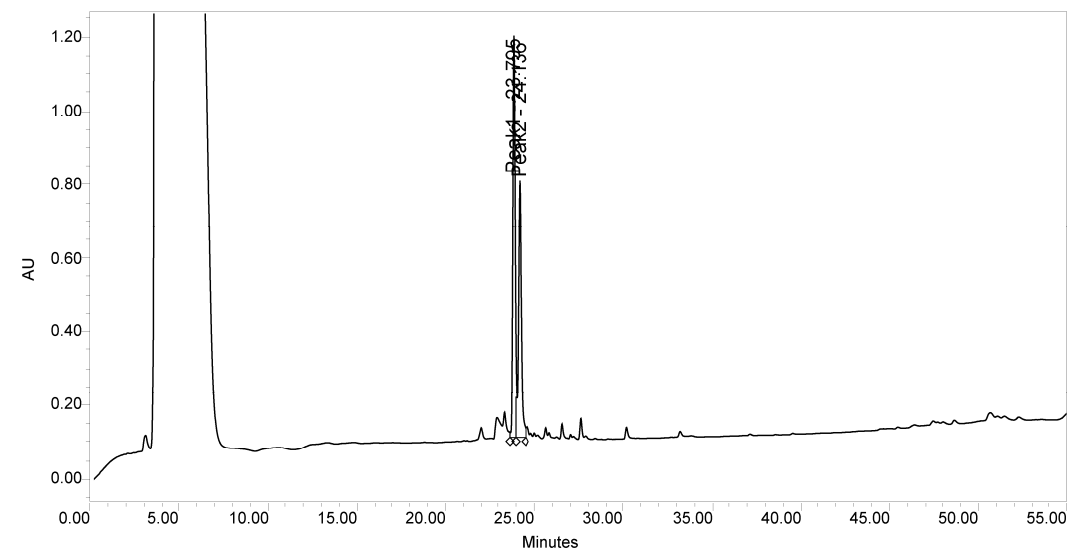

|   | Peak Name | RT (min) | Area (V*sec) | % Area | Height (V) | % Height |
|---|-----------|----------|--------------|--------|------------|----------|
| 1 | Peak1     | 23.795   | 10270094     | 57.63  | 1094543    | 61.02    |
| 2 | Peak2     | 24.136   | 7550774      | 42.37  | 699079     | 38.98    |

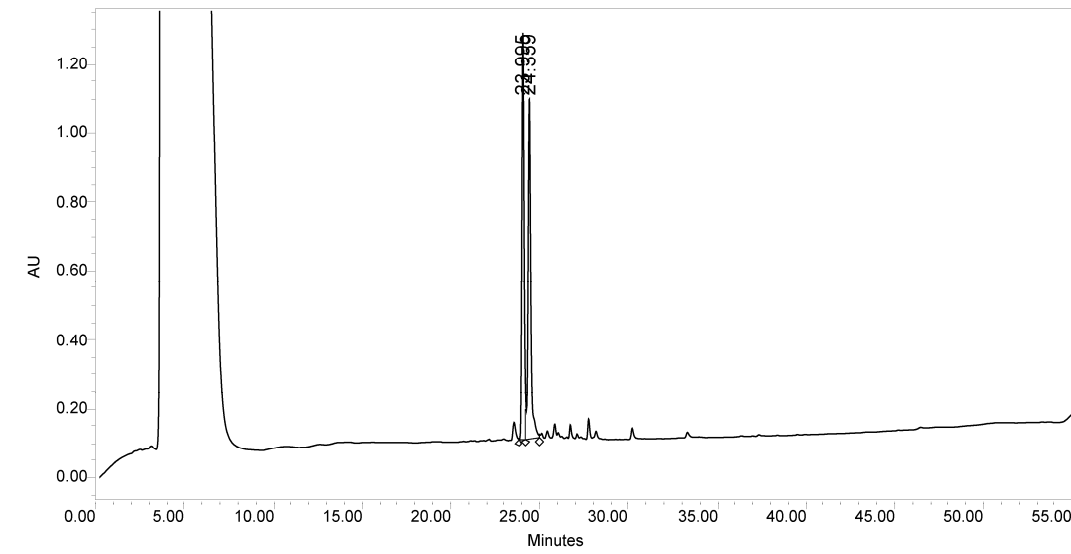

|   | RT (min) | Area (V*sec) | % Area | Height (V) | % Height |
|---|----------|--------------|--------|------------|----------|
| 1 | 23.995   | 10837650     | 50.21  | 1183637    | 54.32    |
| 2 | 24.359   | 10749133     | 49.79  | 995544     | 45.68    |

14

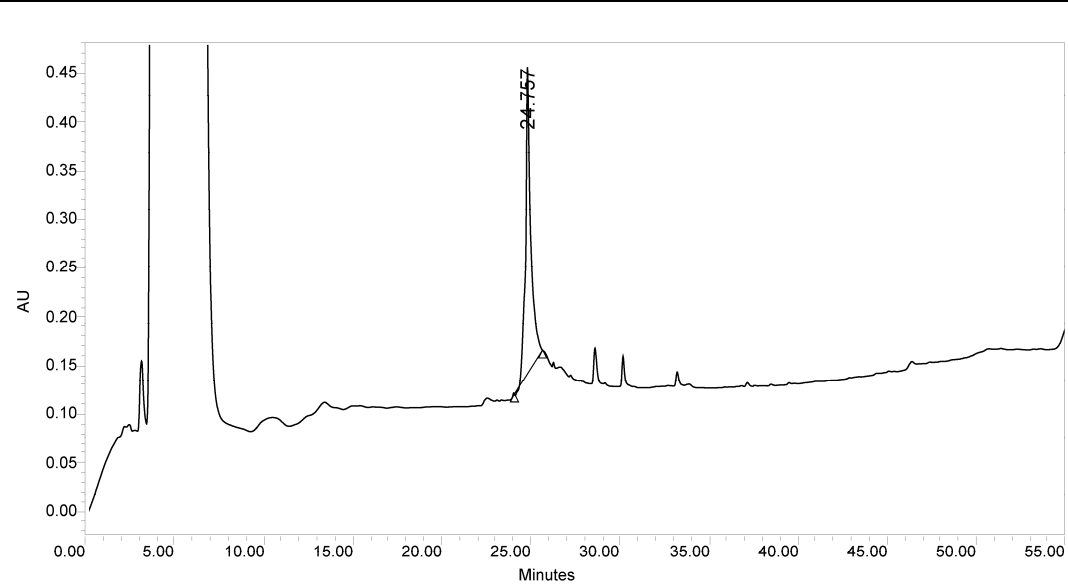

|   | RT (min) | Area (V*sec) | % Area | Height (V) | % Height |
|---|----------|--------------|--------|------------|----------|
| 1 | 24.757   | 6742896      | 100.00 | 319308     | 100.00   |

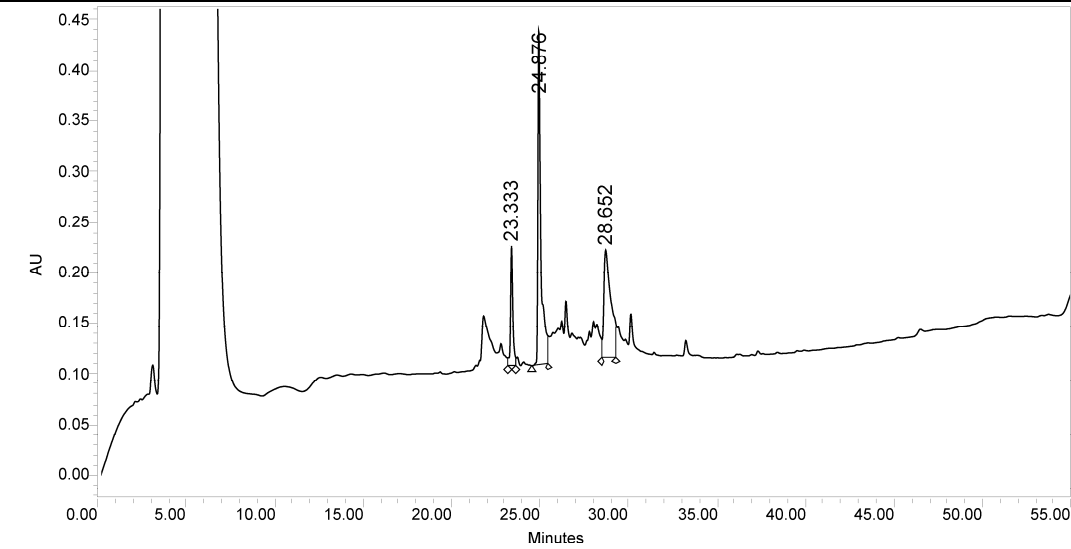

|   | RT (min) | Area (V*sec) | % Area | Height (V) | % Height |
|---|----------|--------------|--------|------------|----------|
| 1 | 23.333   | 1082974      | 13.15  | 119029     | 21.25    |
| 2 | 24.876   | 4009100      | 48.69  | 333464     | 59.54    |
| 3 | 28.652   | 3142690      | 38.16  | 107571     | 19.21    |



15

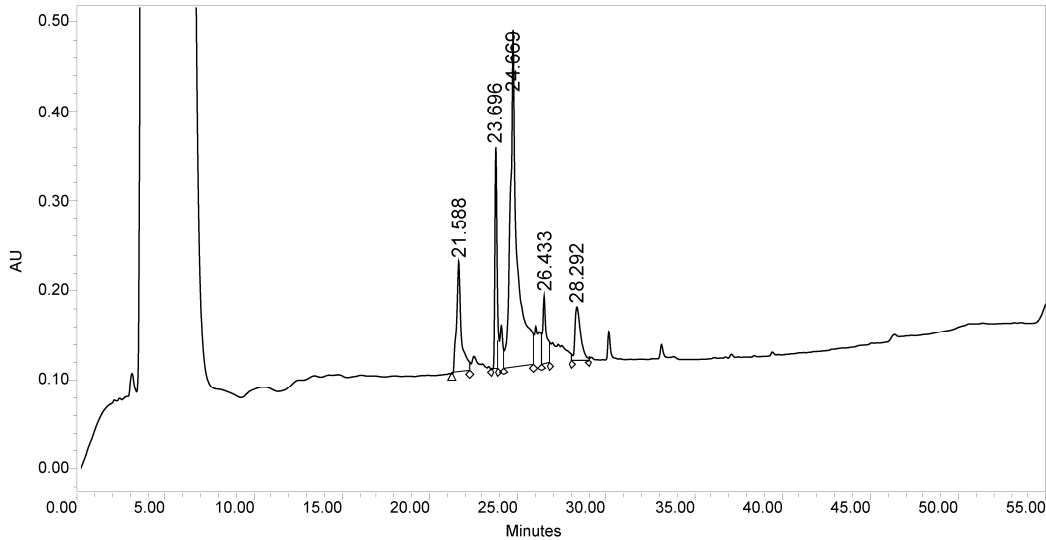

|   | RT<br>(min) | Area<br>(V*sec) | % Area | Height<br>(V) | % Height |
|---|-------------|-----------------|--------|---------------|----------|
| 1 | 21.588      | 2395919         | 13.81  | 125205        | 14.08    |
| 2 | 23.696      | 2269585         | 13.08  | 249398        | 28.04    |
| 3 | 24.669      | 10122206        | 58.32  | 377370        | 42.44    |
| 4 | 26.433      | 1200915         | 6.92   | 76213         | 8.57     |
| 5 | 28.292      | 1366805         | 7.88   | 61101         | 6.87     |

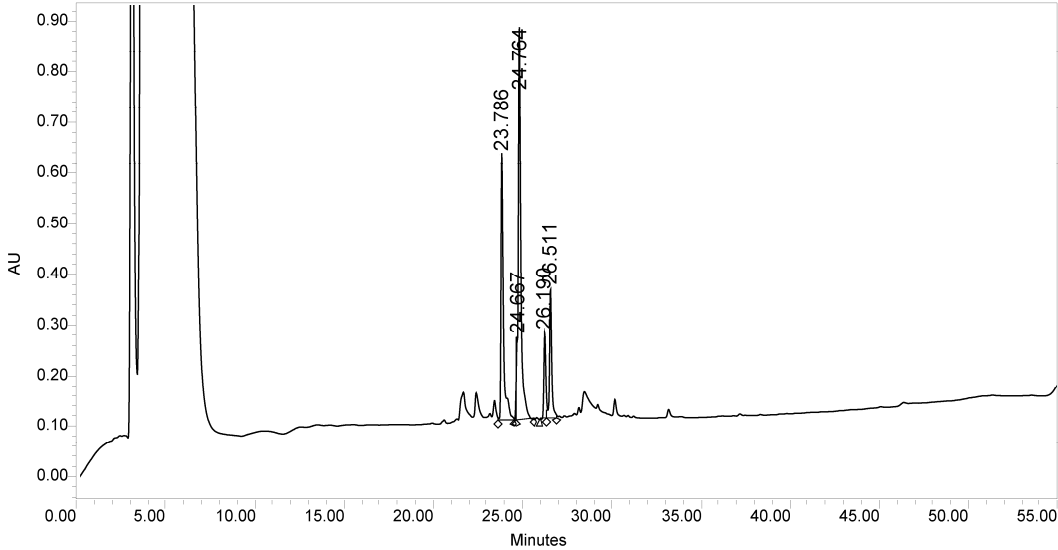

|   | RT<br>(min) | Area<br>(V*sec) | % Area | Height<br>(V) | % Height |
|---|-------------|-----------------|--------|---------------|----------|
| 1 | 23.786      | 5056478         | 29.38  | 528096        | 27.93    |
| 2 | 24.667      | 823040          | 4.78   | 162693        | 8.60     |
| 3 | 24.764      | 7737352         | 44.95  | 775338        | 41.00    |
| 4 | 26.190      | 1390224         | 8.08   | 169667        | 8.97     |
| 5 | 26.511      | 2204924         | 12.81  | 255138        | 13.49    |

16

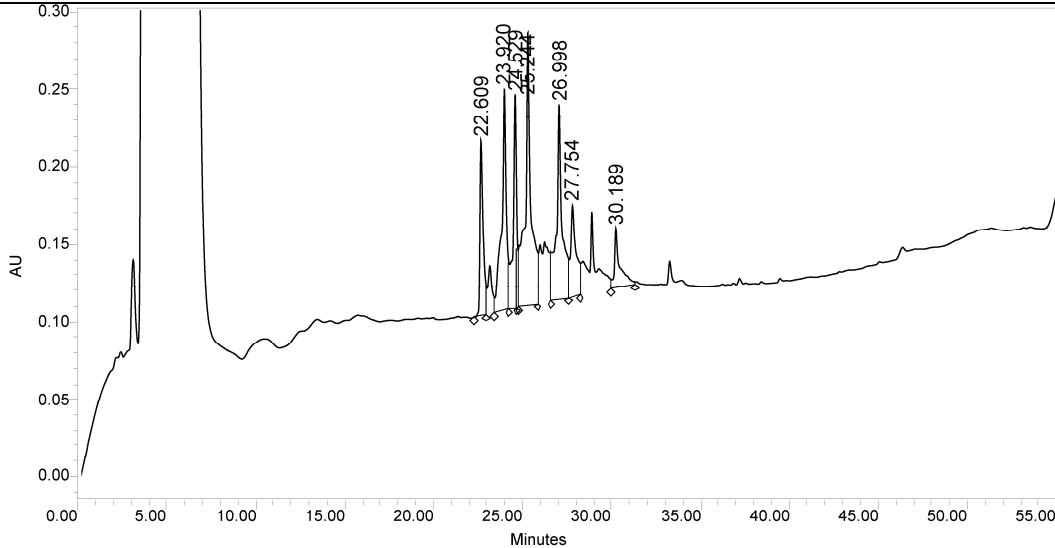

|   | RT<br>(min) | Area<br>(V*sec) | % Area | Height<br>(V) | % Height |
|---|-------------|-----------------|--------|---------------|----------|
| 1 | 22.609      | 1498640         | 10.08  | 113879        | 14.23    |
| 2 | 23.920      | 2713264         | 18.24  | 143865        | 17.98    |
| 3 | 24.529      | 1793021         | 12.05  | 139000        | 17.37    |
| 4 | 25.244      | 3913721         | 26.31  | 177577        | 22.19    |
| 5 | 26.998      | 2789413         | 18.75  | 126568        | 15.82    |
| 6 | 27.754      | 1292310         | 8.69   | 59680         | 7.46     |
| 7 | 30.189      | 874233          | 5.88   | 39544         | 4.94     |

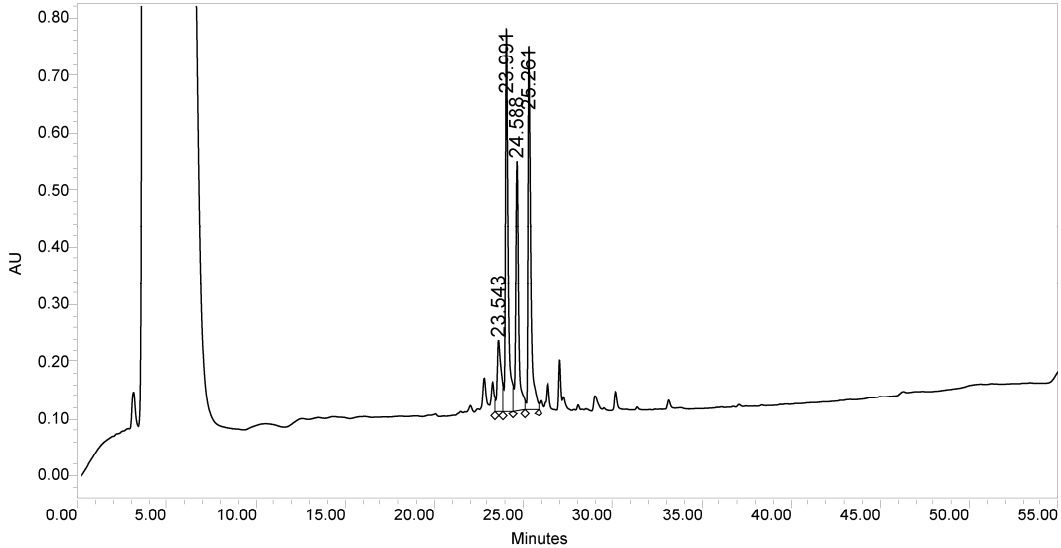

|   | RT<br>(min) | Area<br>(V*sec) | % Area | Height<br>(V) | % Height |
|---|-------------|-----------------|--------|---------------|----------|
| 1 | 23.543      | 2036062         | 9.87   | 127334        | 6.76     |
| 2 | 23.991      | 7121377         | 34.51  | 676470        | 35.94    |
| 3 | 24.588      | 4785831         | 23.20  | 439482        | 23.35    |
| 4 | 25.261      | 6689465         | 32.42  | 639190        | 33.95    |

17

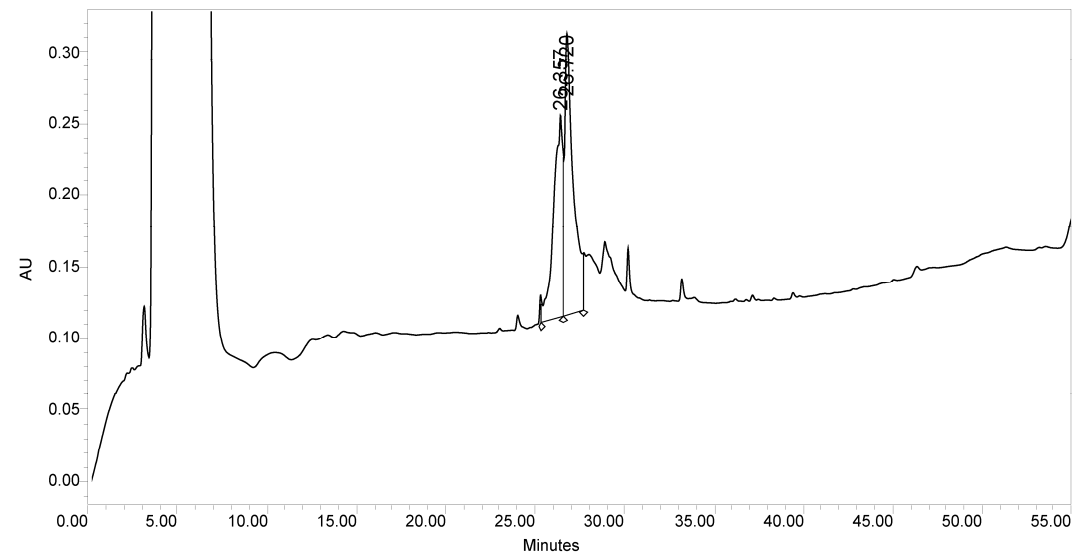

|   | RT<br>(min) | Area<br>(V*sec) | % Area | Height<br>(V) | %<br>Height |
|---|-------------|-----------------|--------|---------------|-------------|
| 1 | 26.357      | 5180863         | 43.77  | 141521        | 41.78       |
| 2 | 26.720      | 6654384         | 56.23  | 197231        | 58.22       |

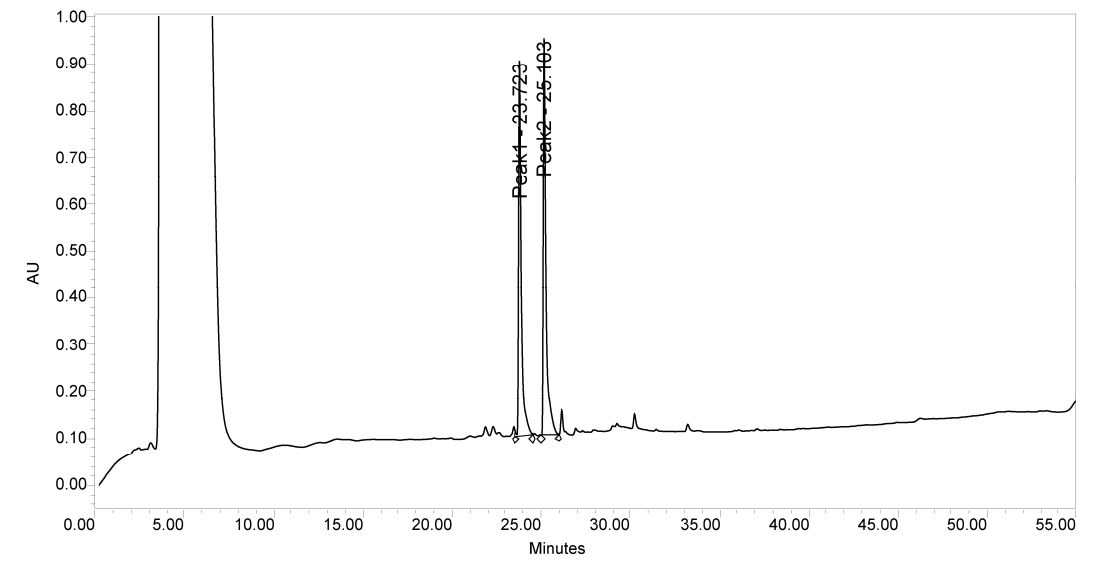

|   | Peak<br>Name | RT<br>(min) | Area<br>(V*sec) | % Area | Height<br>(V) | %<br>Height |
|---|--------------|-------------|-----------------|--------|---------------|-------------|
| 1 | Peak1        | 23.723      | 8492882         | 48.15  | 807463        | 48.71       |
| 2 | Peak2        | 25.103      | 9145389         | 51.85  | 850250        | 51.29       |

18

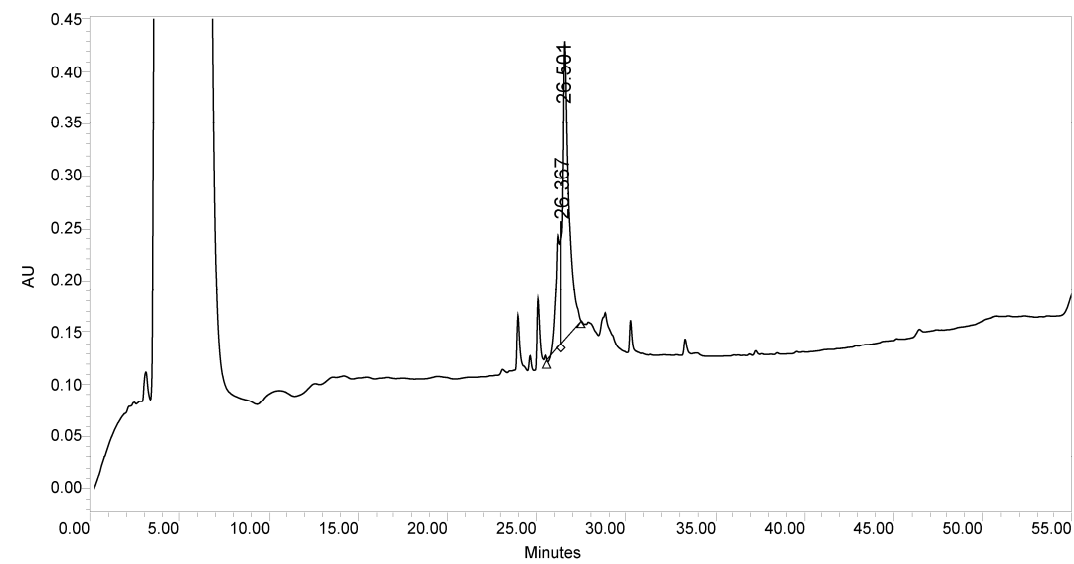

|   | RT<br>(min) | Area<br>(V*sec) | % Area | Height<br>(V) | %<br>Height |
|---|-------------|-----------------|--------|---------------|-------------|
| 1 | 26.367      | 2491002         | 27.98  | 117938        | 28.98       |
| 2 | 26.501      | 6413279         | 72.02  | 288963        | 71.02       |

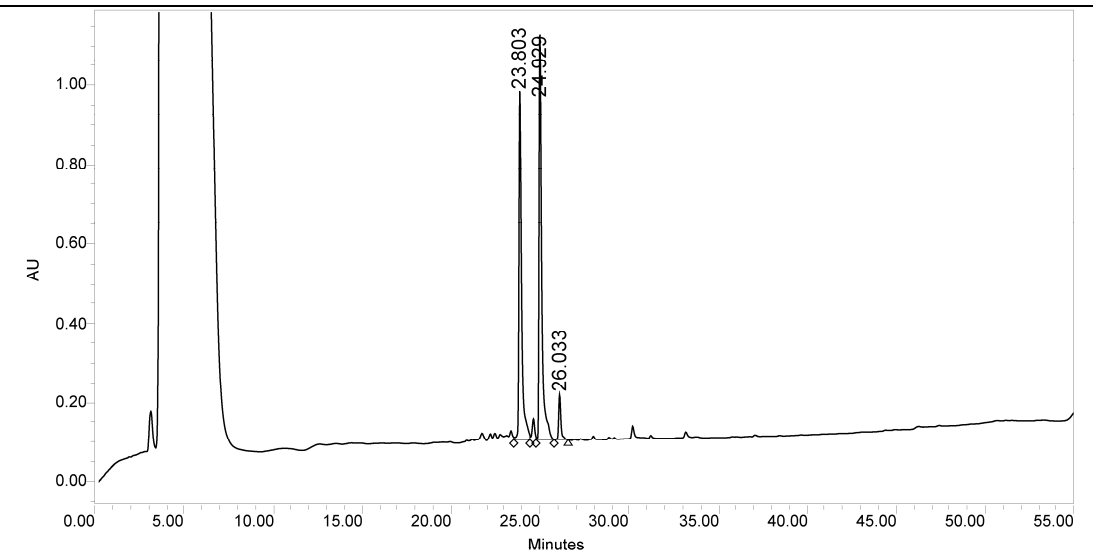

|   | RT<br>(min) | Area<br>(V*sec) | % Area | Height<br>(V) | %<br>Height |
|---|-------------|-----------------|--------|---------------|-------------|
| 1 | 23.803      | 9228135         | 44.22  | 883963        | 43.65       |
| 2 | 24.929      | 10625166        | 50.92  | 1027216       | 50.73       |
| 3 | 26.033      | 1014661         | 4.86   | 113741        | 5.62        |

**Figure S6. Mass spectra of the reaction mixture of each individual synthetic bactenecin-derived AMPs incubated with trypsin.** Left and right spectra were recorded after 2 h and 24 h incubation, respectively. The values are monoisotopic masses in positive mode.

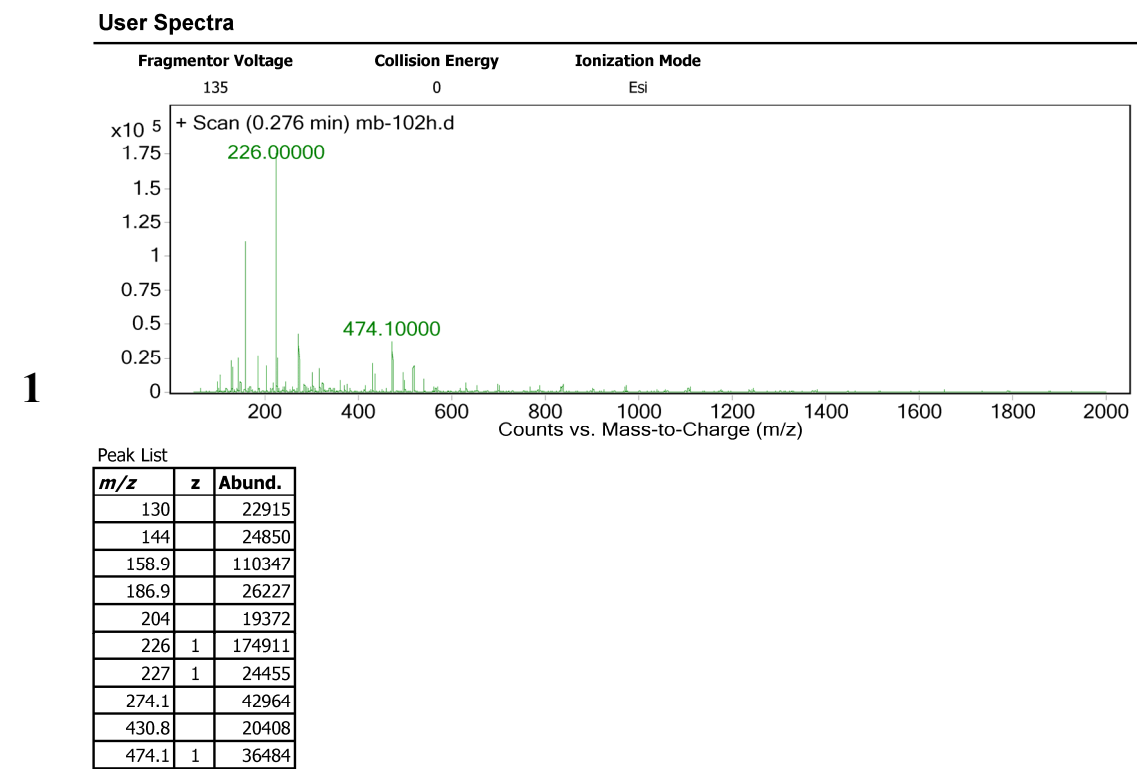

1

Trp-Ile-Arg-OH;  
[M+H]<sup>+</sup><sub>found</sub> = 474.1, [M+H]<sup>+</sup><sub>calculated</sub> = 474.3

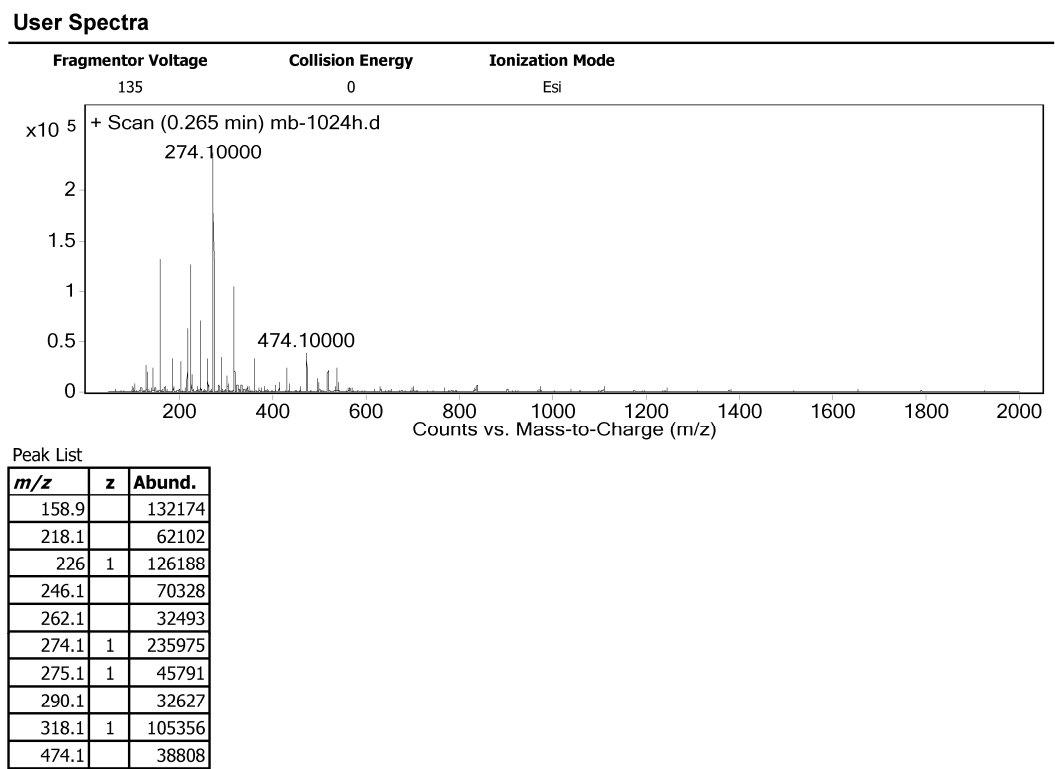

Trp-Ile-Arg-OH;  
[M+H]<sup>+</sup><sub>found</sub> = 474.1, [M+H]<sup>+</sup><sub>calculated</sub> = 474.3  
Trp-Trp-Lys-OH;  
[M+HOAc+2H]<sup>2+</sup><sub>found</sub> = 290.1<sup>a</sup>, [M+HOAc+2H]<sup>2+</sup><sub>calculated</sub> = 290.1  
<sup>a</sup> Monoisotopic mass of HOAc is 60.02 Da.

2

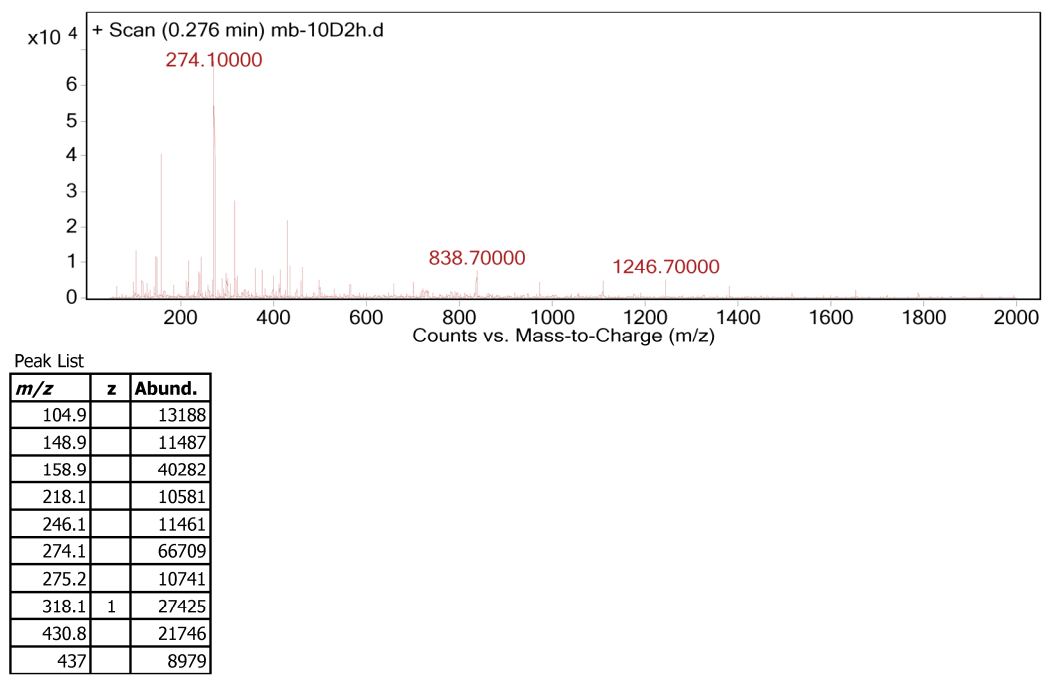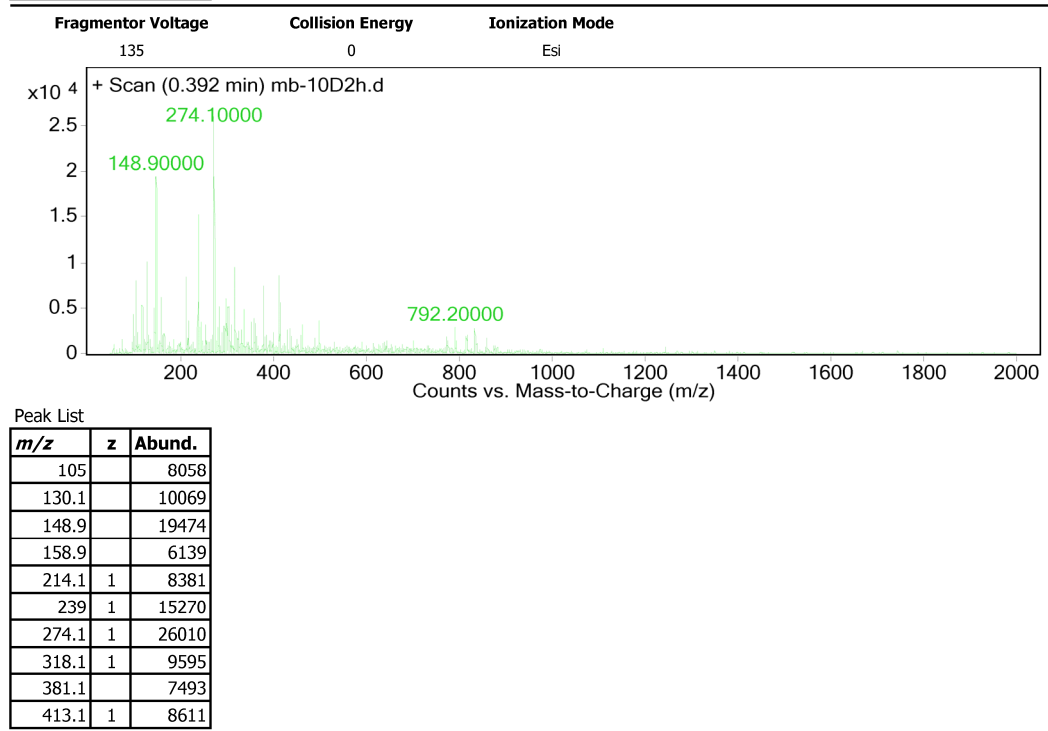

Intact **2<sup>b</sup>**;

$[M+2\text{HOAc}+\text{TFA}+2\text{H}]^{2+}_{\text{found}} = 838.7$ ,  $[M+2\text{HOAc}+\text{TFA}+2\text{H}]^{2+}_{\text{calculated}} = 839.4$

$[M+6\text{HOAc}+5\text{TFA}+3\text{H}]^{3+}_{\text{found}} = 792.2$ ,  $[M+6\text{HOAc}+5\text{TFA}+3\text{H}]^{3+}_{\text{calculated}} = 791.9$

$[M+5\text{HOAc}+4\text{H}]^{4+}_{\text{found}} = 437.0$ ,  $[M+5\text{HOAc}+4\text{H}]^{4+}_{\text{calculated}} = 436.7$

<sup>b</sup> all-*D*-HHC-10 and Retro-inverso-HHC-10 were in impure forms.

continued in next page

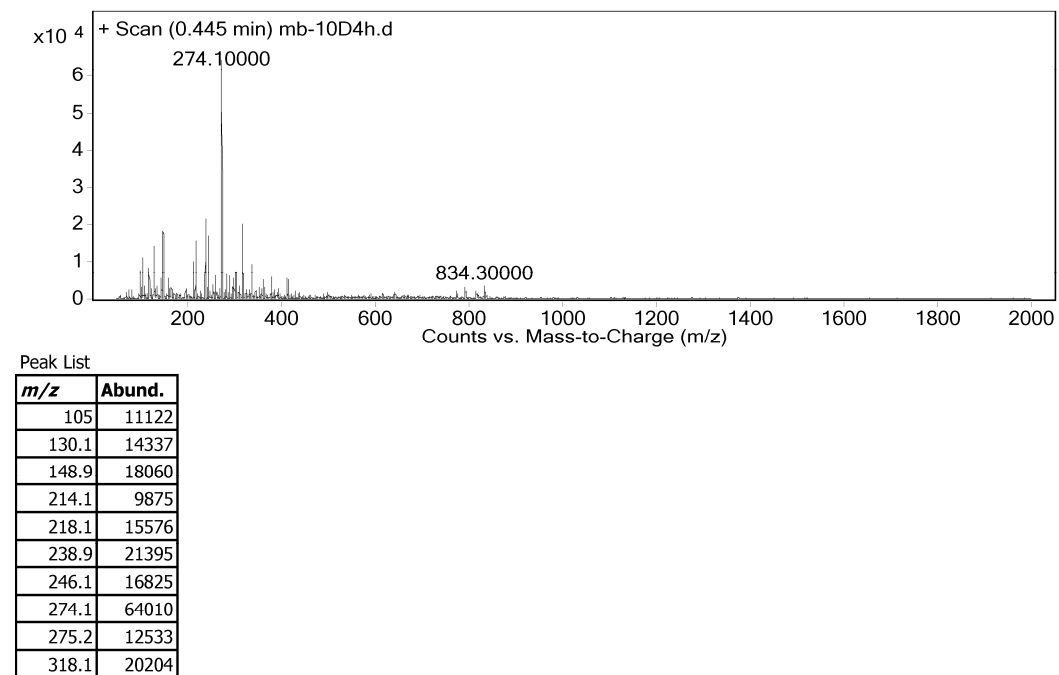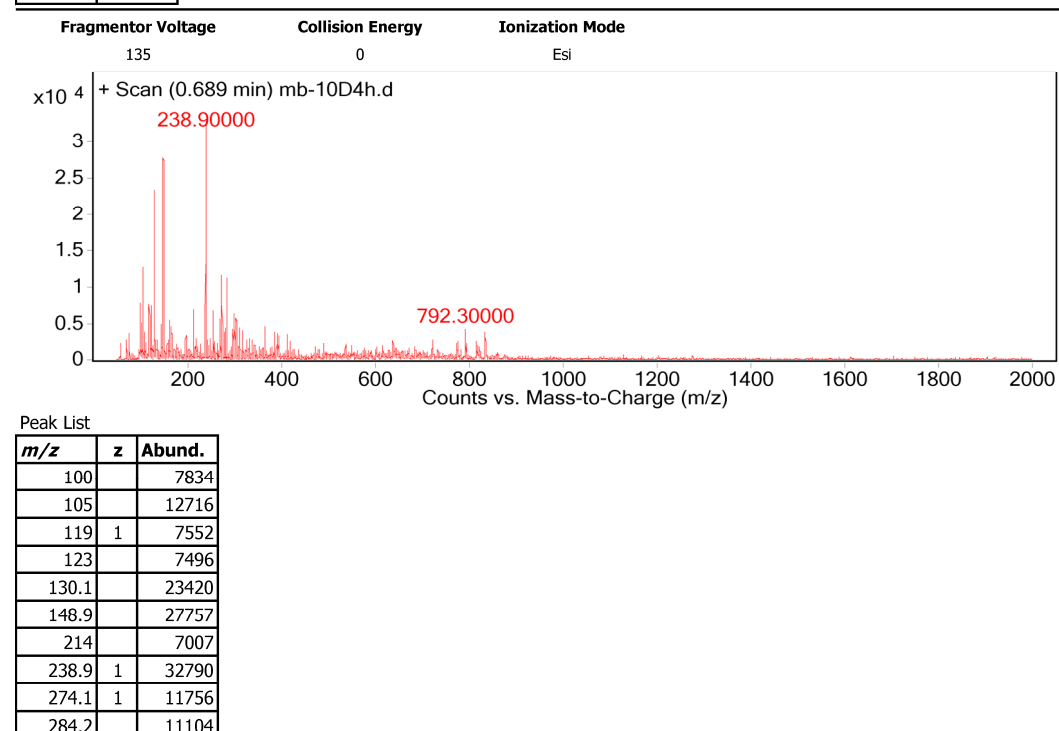

Intact **2**;

$[M+10\text{HOAc}+4\text{TFA}+3\text{H}]^{3+}_{\text{found}} = 834.3$ ,  $[M+10\text{HOAc}+4\text{TFA}+3\text{H}]^{3+}_{\text{calculated}} = 834.0$

$[M+6\text{HOAc}+5\text{TFA}+3\text{H}]^{3+}_{\text{found}} = 792.3$ ,  $[M+6\text{HOAc}+5\text{TFA}+3\text{H}]^{3+}_{\text{calculated}} = 791.9$

2

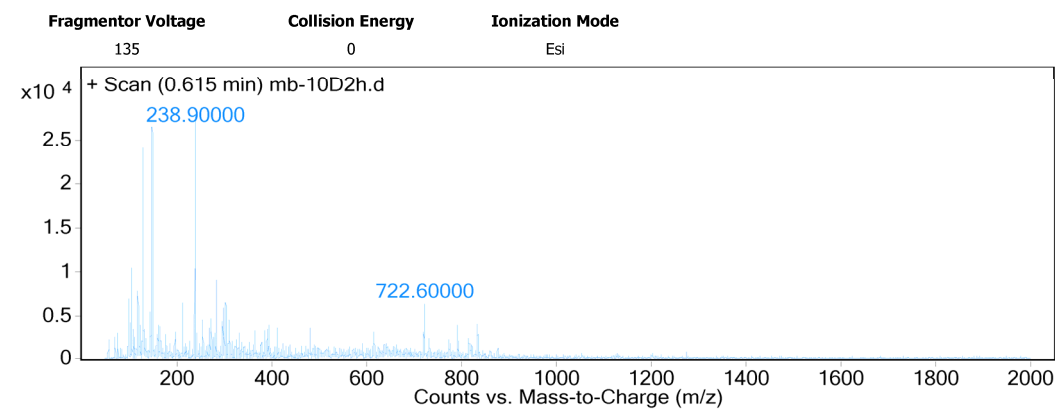

Peak List

| m/z   | z | Abund. |
|-------|---|--------|
| 100   |   | 6915   |
| 105   | 1 | 10539  |
| 119   |   | 7769   |
| 130   | 1 | 24113  |
| 148.9 |   | 26434  |
| 214.1 |   | 6367   |
| 238.9 | 1 | 27635  |
| 284.2 | 1 | 9176   |
| 304.1 | 1 | 6442   |
| 722.6 |   | 6260   |

Intact **2**;  
 $[M+2H]^{2+}_{\text{found}} = 722.6, [M+2H]^{2+}_{\text{calculated}} = 722.4$

User Spectra

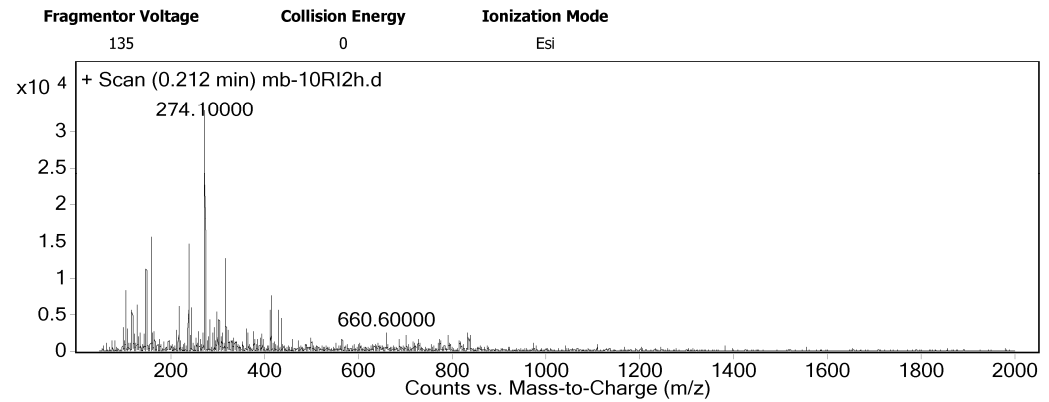

Peak List

| m/z   | z | Abund. |
|-------|---|--------|
| 105   |   | 8358   |
| 130   |   | 6383   |
| 148.9 |   | 11181  |
| 158.9 |   | 15700  |
| 218.1 |   | 6134   |
| 238.9 | 1 | 14529  |
| 246.1 |   | 6117   |
| 274.1 |   | 32820  |
| 318.1 | 1 | 12681  |
| 415.1 |   | 7555   |

| Fragmentor Voltage | Collision Energy | Ionization Mode |
|--------------------|------------------|-----------------|
| 135                | 0                | Esi             |

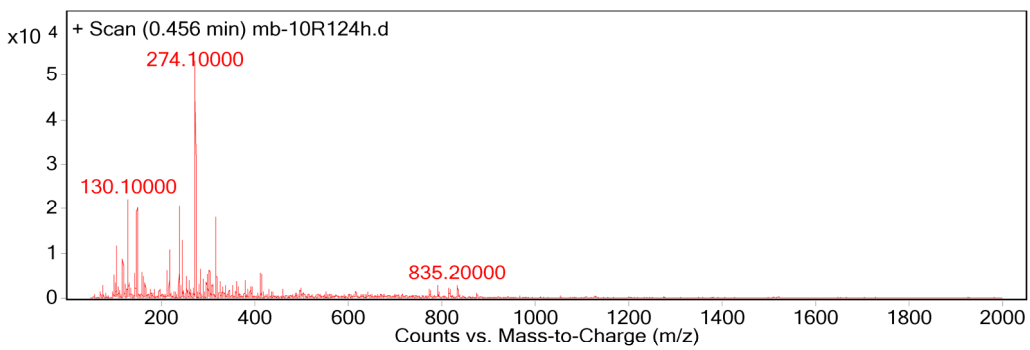

Peak List

| m/z   | z | Abund. |
|-------|---|--------|
| 105   |   | 11866  |
| 119   |   | 8747   |
| 130.1 | 1 | 22209  |
| 149   |   | 20062  |
| 218.1 | 1 | 10805  |
| 239   | 1 | 20799  |
| 246.1 |   | 12892  |
| 274.1 |   | 53057  |
| 275.2 |   | 10139  |
| 318.2 |   | 18131  |

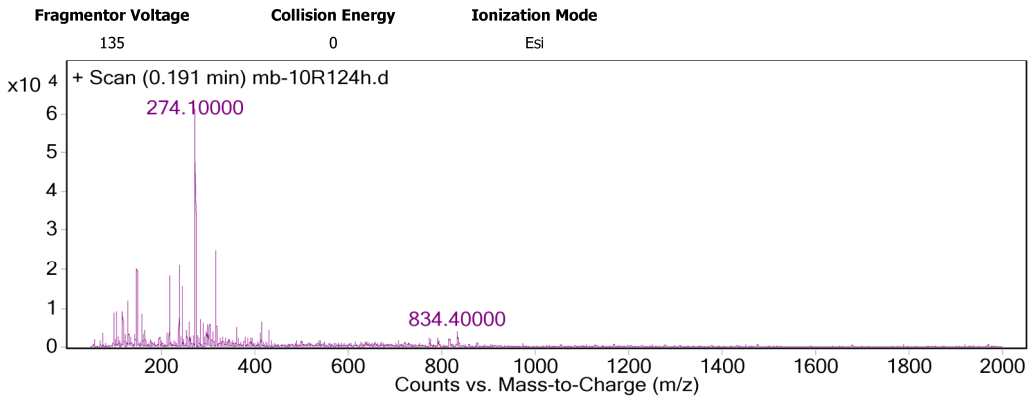

Peak List

| m/z   | z | Abund. |
|-------|---|--------|
| 105.1 |   | 9111   |
| 119   |   | 9217   |
| 130.1 | 1 | 11969  |
| 148.9 |   | 19896  |
| 218.1 | 1 | 18140  |
| 239   | 1 | 20707  |
| 246.1 |   | 15701  |
| 274.1 | 1 | 61183  |
| 275.1 | 1 | 11864  |
| 318.2 |   | 24801  |

3

Intact 3;

$[M+7\text{HOAc}+\text{TFA}+3\text{H}]^{3+}_{\text{found}} = 660.6, [M+7\text{HOAc}+\text{TFA}+3\text{H}]^{3+}_{\text{calculated}} = 660.0$

continued in next page

Intact 3;

$[M+12\text{HOAc}+3\text{TFA}+3\text{H}]^{3+}_{\text{found}} = 835.2, [M+12\text{HOAc}+3\text{TFA}+3\text{H}]^{3+}_{\text{calculated}} = 836.0$

$[M+10\text{HOAc}+4\text{TFA}+3\text{H}]^{3+}_{\text{found}} = 834.4, [M+10\text{HOAc}+4\text{TFA}+3\text{H}]^{3+}_{\text{calculated}} = 834.0$

3

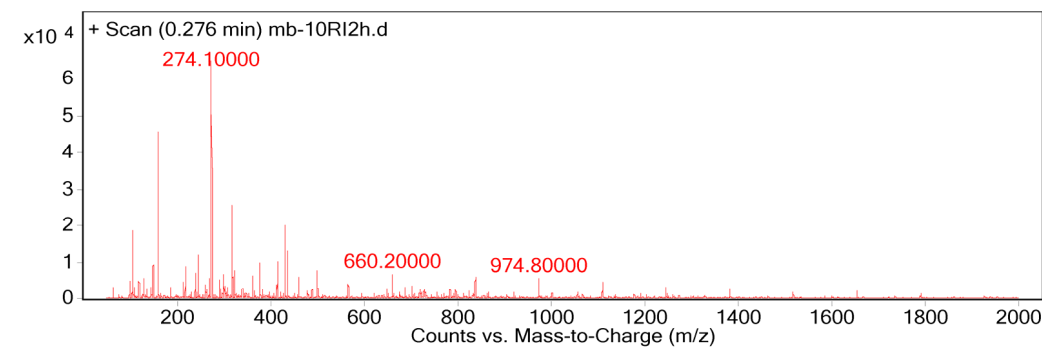

Peak List

| m/z   | z | Abund. |
|-------|---|--------|
| 104.9 |   | 18756  |
| 158.9 |   | 45649  |
| 246.1 |   | 11887  |
| 274.1 | 1 | 64861  |
| 275.1 | 1 | 13726  |
| 318.2 | 1 | 25454  |
| 376.8 |   | 9946   |
| 415.1 |   | 10270  |
| 430.8 |   | 20170  |
| 437.1 |   | 13012  |

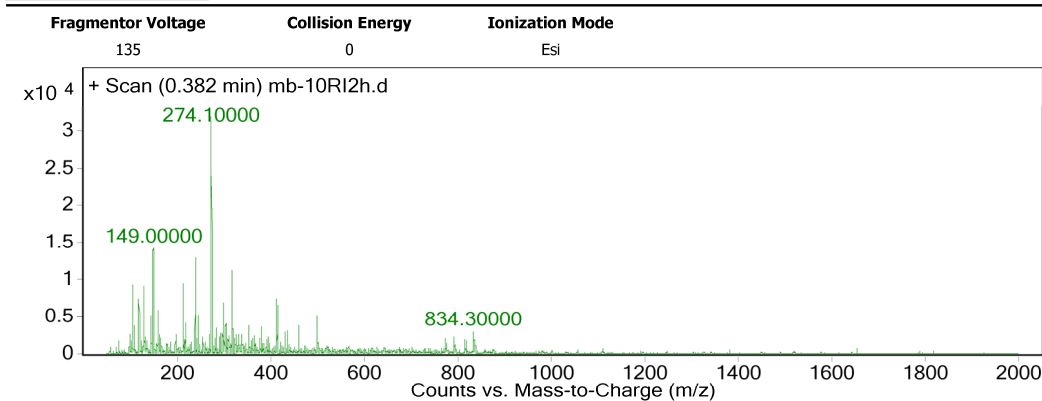

Peak List

| m/z   | z | Abund. |
|-------|---|--------|
| 105.1 |   | 9345   |
| 119   |   | 7457   |
| 130   | 1 | 9147   |
| 149   |   | 14101  |
| 214.2 |   | 9520   |
| 238.9 |   | 12925  |
| 274.1 | 1 | 31874  |
| 300.9 |   | 6835   |
| 318.1 |   | 11280  |
| 413.1 | 1 | 7494   |

Intact **3**;  
[M+7HOAc+TFA+3H]<sup>3+</sup><sub>found</sub> = 660.6, [M+7HOAc+TFA+3H]<sup>3+</sup><sub>calculated</sub> = 660.0  
[M+10HOAc+4TFA+3H]<sup>3+</sup><sub>found</sub> = 834.3, [M+10HOAc+4TFA+3H]<sup>3+</sup><sub>calculated</sub> = 834.0

4

User Spectra

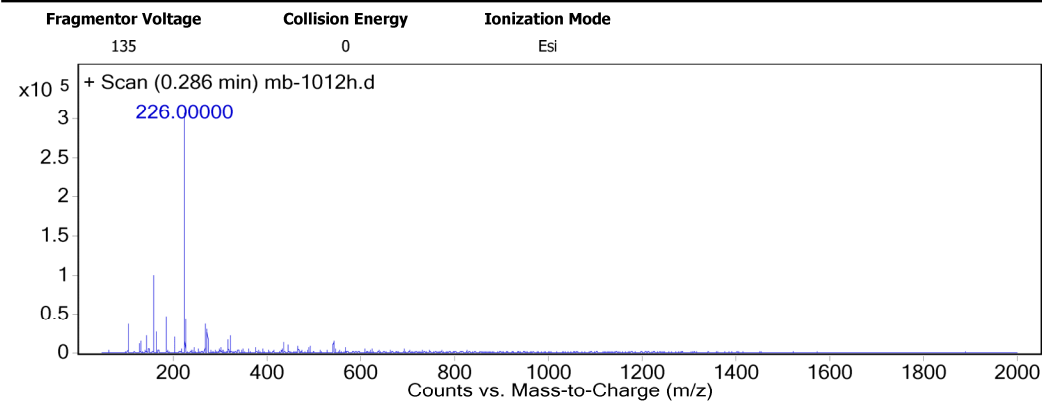

Peak List

| m/z   | z | Abund. |
|-------|---|--------|
| 104.9 |   | 36393  |
| 144   |   | 21334  |
| 159   |   | 99205  |
| 164.8 |   | 26517  |
| 186.9 |   | 46810  |
| 226   | 1 | 305688 |
| 227   | 1 | 42299  |
| 228.8 |   | 22764  |
| 268.8 |   | 35942  |
| 274.1 |   | 30513  |

not detectable

User Spectra

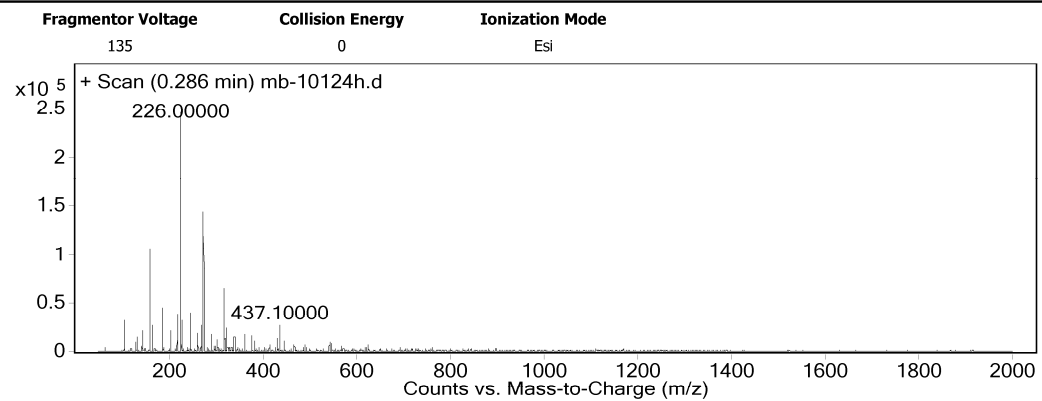

Peak List

| m/z   | z | Abund. |
|-------|---|--------|
| 104.9 |   | 32507  |
| 159   |   | 104871 |
| 186.9 |   | 45780  |
| 218.1 |   | 38048  |
| 226   | 1 | 246173 |
| 227   | 1 | 31928  |
| 246.1 |   | 39594  |
| 274.2 |   | 144258 |
| 275.1 |   | 28305  |
| 318.1 |   | 65216  |

Lys-Trp-Trp-Arg-OH;  
[M+3HOAc+4TFA+3H]<sup>3+</sup><sub>found</sub> = 437.1, [M+3HOAc+4TFA+3H]<sup>3+</sup><sub>calculated</sub> = 437.8

5

User Spectra

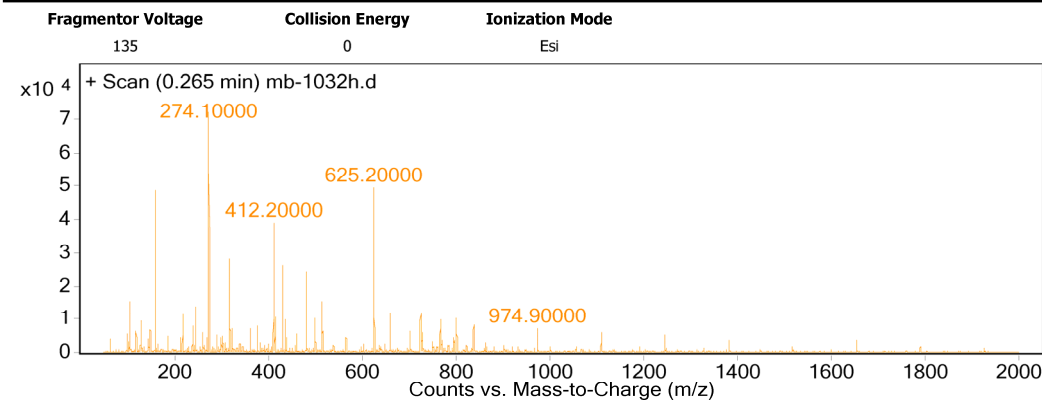

Peak List

| m/z   | z | Abund. |
|-------|---|--------|
| 105   |   | 15343  |
| 158.9 |   | 48512  |
| 274.1 | 1 | 71857  |
| 318.2 |   | 28090  |
| 412.2 |   | 38701  |
| 430.8 |   | 26058  |
| 481.1 | 1 | 24143  |
| 515.2 | 1 | 15096  |
| 625.2 |   | 49371  |
| 626.1 |   | 17521  |

Fragmentor Voltage: 135, Collision Energy: 0, Ionization Mode: Esi

User Spectra

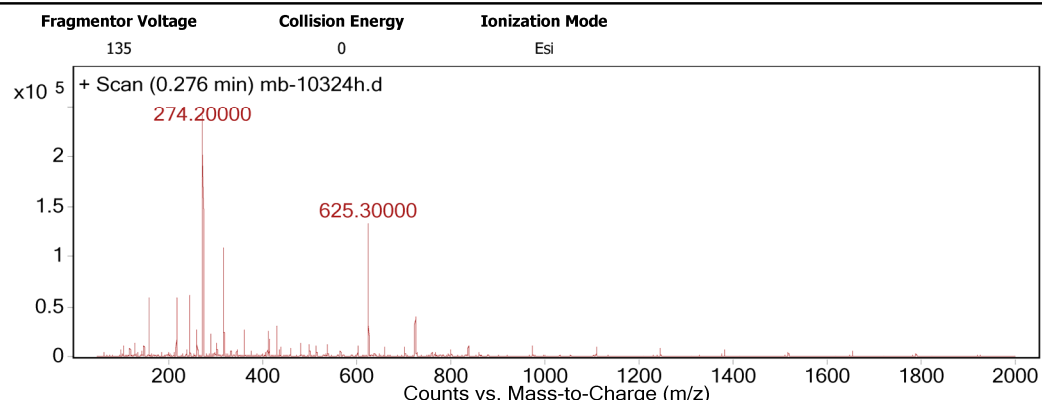

Peak List

| m/z   | z | Abund. |
|-------|---|--------|
| 158.9 |   | 59020  |
| 218.1 |   | 58034  |
| 246.1 |   | 60990  |
| 274.2 |   | 240381 |
| 275.1 |   | 41059  |
| 318.1 | 1 | 107777 |
| 430.8 |   | 30477  |
| 625.3 |   | 132801 |
| 626.2 |   | 49911  |
| 725.3 | 1 | 39327  |

Fragmentor Voltage: 135, Collision Energy: 0, Ionization Mode: Esi



continued in next page

Dab-Trp-Trp-Dab-Trp-Ile-Dab-Trp-NH<sub>2</sub>;

$[M+1\text{HOAc}+3\text{H}]^{3+}_{\text{found}} = 412.2, [M+1\text{HOAc}+3\text{H}]^{3+}_{\text{calculated}} = 412.6$

Trp-Trp-Dab-Trp-Ile-Dab-Trp-NH<sub>2</sub>;

$[M+\text{HOAc}+\text{TFA}+2\text{H}]^{2+}_{\text{found}} = 625.2, [M+\text{HOAc}+\text{TFA}+2\text{H}]^{2+}_{\text{calculated}} = 625.3$

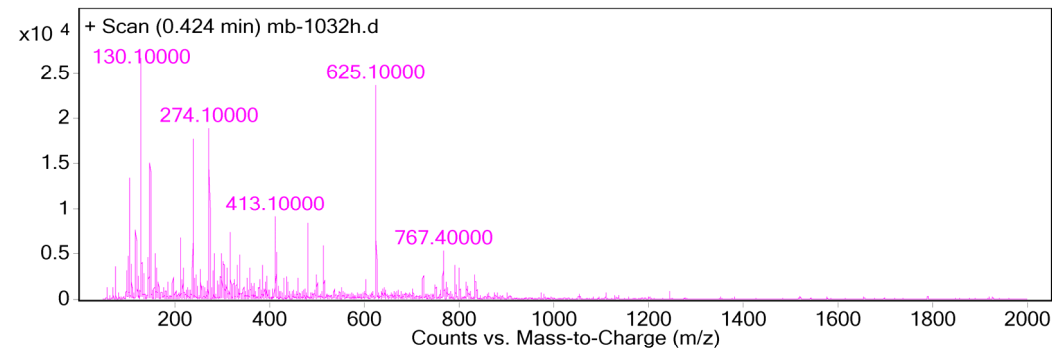

5

| Peak List |   |        |
|-----------|---|--------|
| m/z       | z | Abund. |
| 105       | 1 | 13482  |
| 119       |   | 7691   |
| 130.1     | 1 | 26659  |
| 148.9     |   | 15038  |
| 239       |   | 17818  |
| 274.1     |   | 18874  |
| 413.1     |   | 9052   |
| 481.2     |   | 8323   |
| 625.1     |   | 23710  |
| 626.2     |   | 10030  |

Dab-Trp-Trp-Dab-Trp-Ile-Dab-Trp-NH<sub>2</sub>;

$[M+\text{HOAc}+3\text{H}]^{3+}_{\text{found}} = 412.2, [M+\text{HOAc}+3\text{H}]^{3+}_{\text{calculated}} = 412.6$

Trp-Trp-Dab-Trp-Ile-Dab-Trp-NH<sub>2</sub>;

$[M+\text{HOAc}+\text{TFA}+2\text{H}]^{2+}_{\text{found}} = 625.2, [M+\text{HOAc}+\text{TFA}+2\text{H}]^{2+}_{\text{calculated}} = 625.3$

continued in next page

Trp-Trp-Dab-Trp-Ile-Dab-Trp-NH<sub>2</sub>;

$[M+1\text{HOAc}+1\text{TFA}+2\text{H}]^{2+}_{\text{found}} = 625.3, [M+1\text{HOAc}+1\text{TFA}+2\text{H}]^{2+}_{\text{calculated}} = 625.3$

Trp-Trp-Dab-OH;

$[M+2\text{HOAc}+\text{TFA}+\text{H}]^{+}_{\text{found}} = 725.3, [M+2\text{HOAc}+\text{TFA}+\text{H}]^{+}_{\text{calculated}} = 725.2$

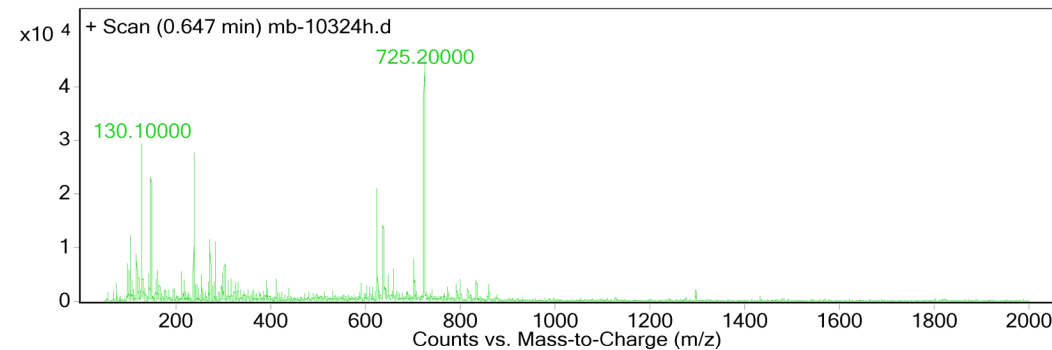

| Peak List |   |        |
|-----------|---|--------|
| m/z       | z | Abund. |
| 105       |   | 12208  |
| 130.1     | 1 | 29339  |
| 148.9     | 1 | 22926  |
| 239       | 1 | 27537  |
| 274.1     |   | 11537  |
| 284.1     | 1 | 11052  |
| 625.2     | 1 | 21105  |
| 638.4     |   | 13982  |
| 725.2     |   | 45205  |
| 726.3     |   | 19599  |

Trp-Trp-Dab-OH;

$[M+2\text{HOAc}+\text{TFA}+\text{H}]^{+}_{\text{found}} = 725.2, [M+2\text{HOAc}+\text{TFA}+\text{H}]^{+}_{\text{calculated}} = 725.2$

6

User Spectra

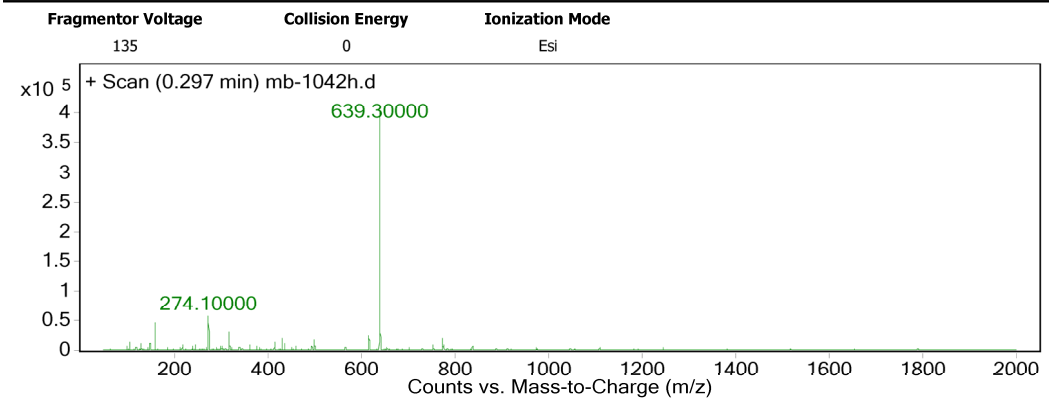

Peak List

| m/z   | Abund. |
|-------|--------|
| 158.9 | 46568  |
| 274.1 | 55679  |
| 318.2 | 29759  |
| 617.3 | 24570  |
| 639.3 | 400349 |
| 640.2 | 148592 |
| 641.3 | 32216  |

| Fragmentor Voltage | Collision Energy | Ionization Mode |
|--------------------|------------------|-----------------|
| 135                | 0                | Esi             |

Orn-Trp-Trp-Orn-Trp-Ile-Orn-Trp-NH<sub>2</sub>;  
[M+HOAc+2H]<sup>2+</sup><sub>found</sub> = 639.3, [M+HOAc+2H]<sup>2+</sup><sub>calculated</sub> = 639.4  
Trp-Ile-Orn-Trp-NH<sub>2</sub>;  
[M+H]<sup>+</sup><sub>found</sub> = 617.3, [M+H]<sup>+</sup><sub>calculated</sub> = 617.4

continued in next page

User Spectra

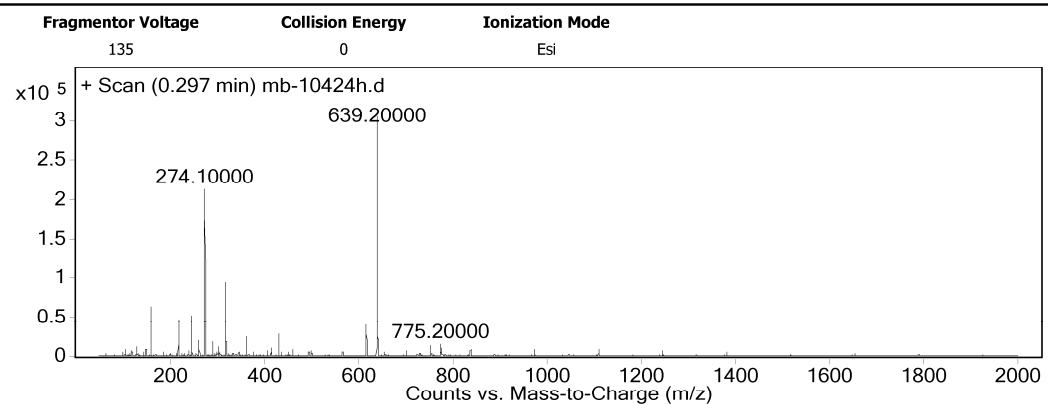

Peak List

| m/z   | z | Abund. |
|-------|---|--------|
| 158.9 |   | 62484  |
| 218.1 |   | 46096  |
| 246.1 |   | 51049  |
| 274.1 | 1 | 213089 |
| 275.1 | 1 | 38333  |
| 318.2 |   | 94464  |
| 430.8 |   | 27584  |
| 617.2 |   | 39439  |
| 639.2 |   | 304568 |
| 640.3 | 1 | 126566 |

Orn-Trp-Trp-Orn-Trp-Ile-Orn-Trp-NH<sub>2</sub>;  
[M+HOAc+2H]<sup>2+</sup><sub>found</sub> = 639.3, [M+HOAc+2H]<sup>2+</sup><sub>calculated</sub> = 639.4  
Trp-Ile-Orn-Trp-NH<sub>2</sub>;  
[M+H]<sup>+</sup><sub>found</sub> = 617.2, [M+H]<sup>+</sup><sub>calculated</sub> = 617.4

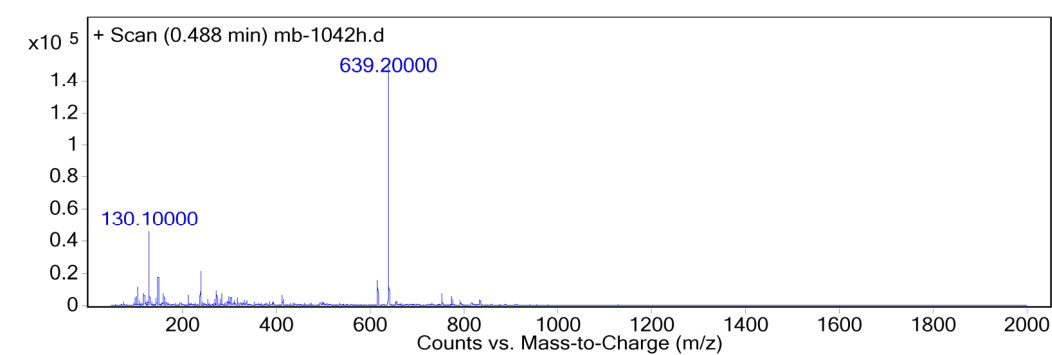

Peak List

| <i>m/z</i> | <i>z</i> | Abund. |
|------------|----------|--------|
| 105.1      |          | 12106  |
| 130.1      |          | 45853  |
| 148.9      |          | 17802  |
| 158.9      |          | 8238   |
| 238.9      |          | 22081  |
| 274.1      |          | 10008  |
| 617.2      | 1        | 16366  |
| 639.2      | 1        | 148387 |
| 640.2      | 1        | 57112  |
| 641.3      |          | 12933  |

6

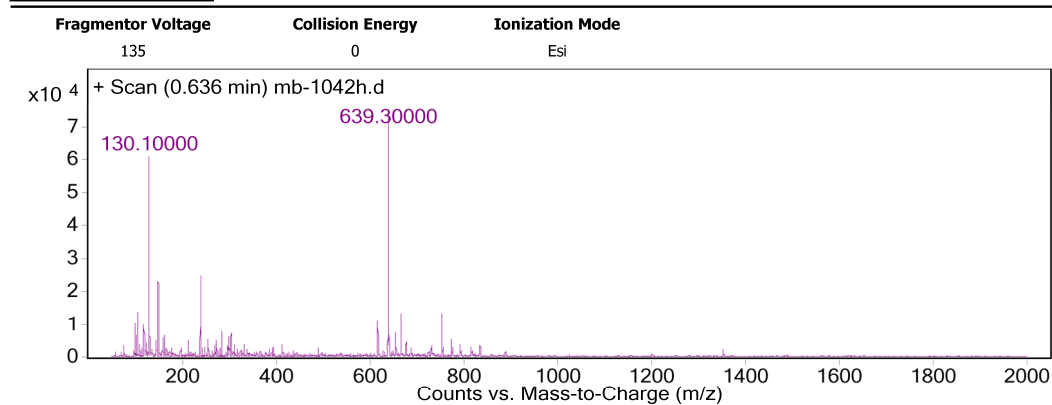

Peak List

| <i>m/z</i> | <i>z</i> | Abund. |
|------------|----------|--------|
| 100        |          | 10384  |
| 105        |          | 13925  |
| 130.1      |          | 60756  |
| 148.9      |          | 22933  |
| 239        |          | 24601  |
| 617.3      |          | 11015  |
| 639.3      | 1        | 72503  |
| 640.3      | 1        | 29998  |
| 666.5      |          | 13199  |
| 753.3      | 1        | 13469  |

Orn-Trp-Trp-Orn-Trp-Ile-Orn-Trp-NH<sub>2</sub>;  
 $[M+HOAc+2H]^{2+}_{\text{found}} = 639.3$ ,  $[M+HOAc+2H]^{2+}_{\text{calculated}} = 639.4$   
 Trp-Trp-Orn-Trp-Ile-Orn-Trp-NH<sub>2</sub>;  
 $[M+2TFA+2H]^{2+}_{\text{found}} = 666.5$ ,  $[M+2TFA+2H]^{2+}_{\text{calculated}} = 666.3$   
 Trp-Ile-Orn-Trp-NH<sub>2</sub>;  
 $[M+H]^{+}_{\text{found}} = 617.3$ ,  $[M+H]^{+}_{\text{calculated}} = 617.4$

7

User Spectra

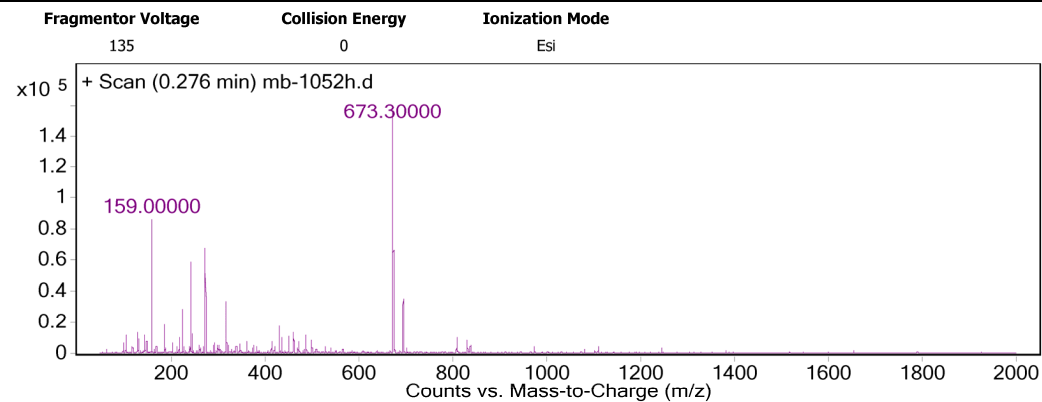

Peak List

| m/z   | z | Abund. |
|-------|---|--------|
| 159   |   | 86371  |
| 187   |   | 18517  |
| 226   |   | 28246  |
| 242.2 | 1 | 58201  |
| 274.1 | 1 | 68127  |
| 318.2 |   | 33413  |
| 430.8 |   | 17197  |
| 673.3 | 1 | 154456 |
| 674.3 | 1 | 65626  |
| 695.3 | 1 | 35312  |

Trp-Ile-Har-Trp-NH<sub>2</sub>;  
[M+H]<sup>+</sup><sub>found</sub> = 673.3, [M+H]<sup>+</sup><sub>calculated</sub> = 673.4

User Spectra

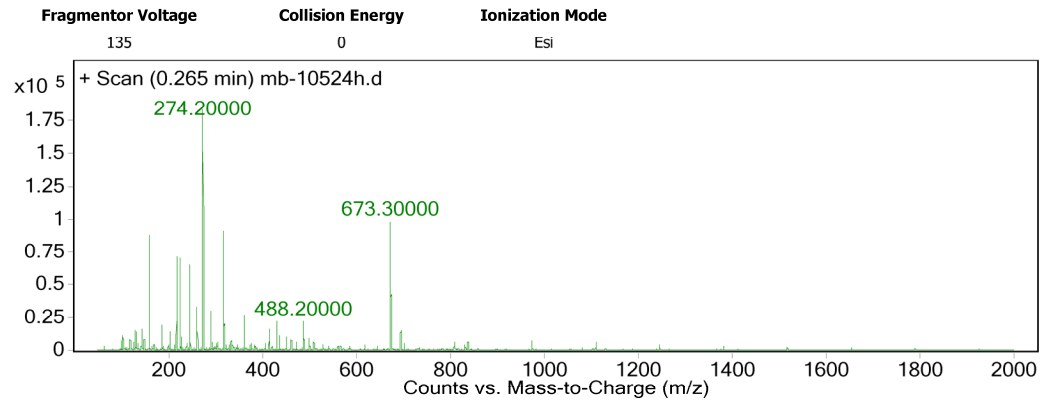

Peak List

| m/z   | z | Abund. |
|-------|---|--------|
| 158.9 |   | 88112  |
| 218.1 | 1 | 71241  |
| 226   | 1 | 70132  |
| 246.1 | 1 | 64854  |
| 262.1 |   | 33045  |
| 274.2 |   | 182694 |
| 290.1 |   | 29752  |
| 318.1 |   | 90749  |
| 673.3 | 1 | 98165  |
| 674.3 | 1 | 42186  |

Trp-Ile-Har-Trp-NH<sub>2</sub>;  
[M+H]<sup>+</sup><sub>found</sub> = 673.3, [M+H]<sup>+</sup><sub>calculated</sub> = 673.4  
Trp-Ile-Har-OH;  
[M+H]<sup>+</sup><sub>found</sub> = 488.2, [M+H]<sup>+</sup><sub>calculated</sub> = 488.3

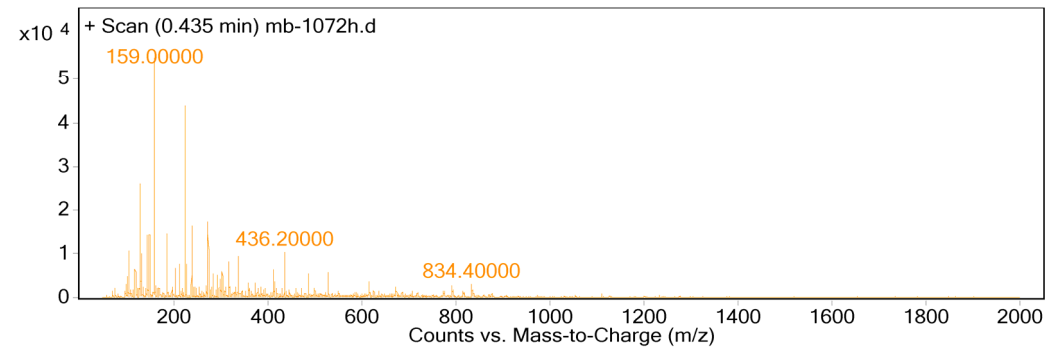

Peak List

| m/z   | z | Abund. |
|-------|---|--------|
| 105   |   | 10569  |
| 130   | 1 | 25913  |
| 144   |   | 14329  |
| 145   |   | 10833  |
| 148.9 |   | 14247  |
| 159   |   | 54671  |
| 187   |   | 14595  |
| 226   | 1 | 43732  |
| 239   |   | 16303  |
| 274.1 | 1 | 17219  |

8

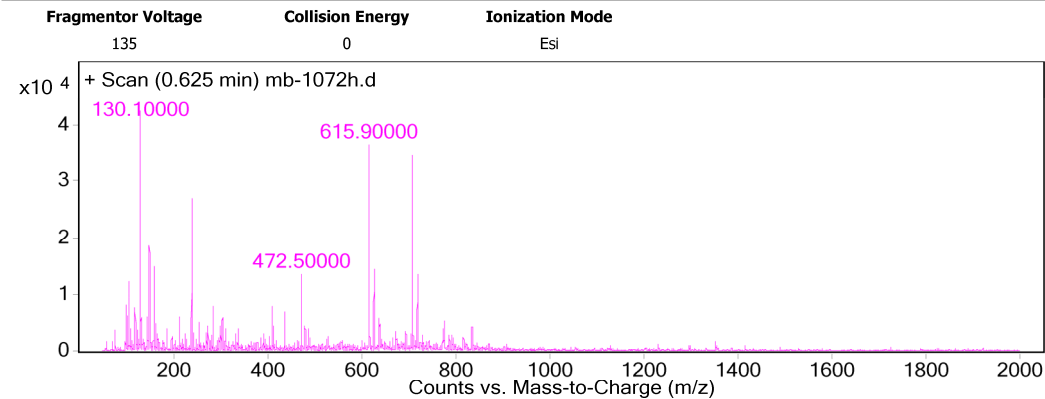

Peak List

| m/z   | z | Abund. |
|-------|---|--------|
| 105   |   | 12287  |
| 130.1 | 1 | 42417  |
| 148.9 |   | 18524  |
| 158.9 |   | 14812  |
| 238.9 |   | 26805  |
| 472.5 |   | 13492  |
| 615.9 |   | 36534  |
| 626.9 |   | 14578  |
| 708.5 |   | 34568  |
| 719.4 |   | 13497  |

Dab-Har-Trp-Trp-Dab-Trp-Ile-Har-OH;

$[M+2H]^{2+}_{\text{found}} = 615.9$ ,  $[M+2H]^{2+}_{\text{calculated}} = 615.9$

Har-Trp-Trp-Dab-Trp-Ile-Har-OH;

$[M+\text{HOAc}+\text{TFA}+3H]^{3+}_{\text{found}} = 436.2$ ,  $[M+\text{HOAc}+\text{TFA}+3H]^{3+}_{\text{calculated}} = 435.5$

Trp-Trp-Dab-Trp-Ile-Har-OH;

$[M+4\text{TFA}+3H]^{3+}_{\text{found}} = 472.5$ ,  $[M+4\text{TFA}+3H]^{3+}_{\text{calculated}} = 472.8$

Trp-Trp-Dab-OH

$[M+2\text{TFA}+H]^+_{\text{found}} = 719.4$ ,  $[M+2\text{TFA}+H]^+_{\text{calculated}} = 719.3$

User Spectra

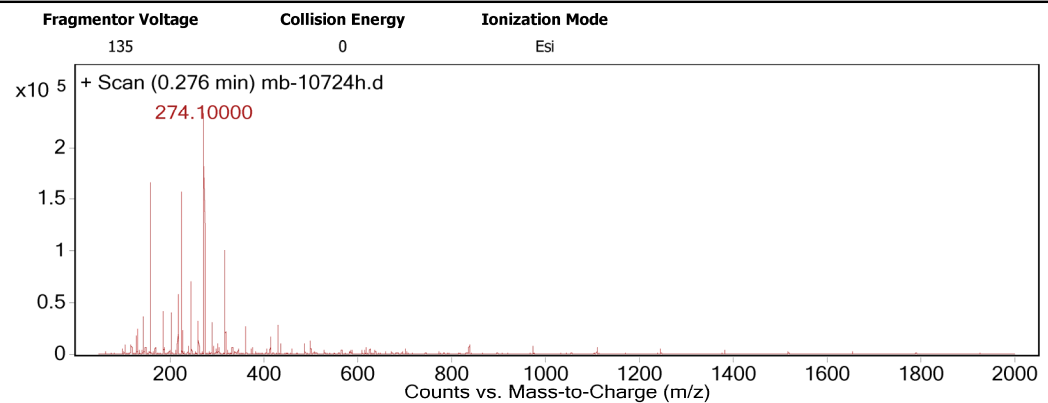

Peak List

| m/z   | z | Abund. |
|-------|---|--------|
| 144   |   | 36610  |
| 159   | 1 | 165379 |
| 187   |   | 41805  |
| 204   |   | 40082  |
| 218.1 |   | 58049  |
| 226   | 1 | 156687 |
| 246.1 |   | 69855  |
| 274.1 | 1 | 231713 |
| 275.1 | 1 | 40409  |
| 318.1 |   | 99774  |

not detectable

## User Spectra

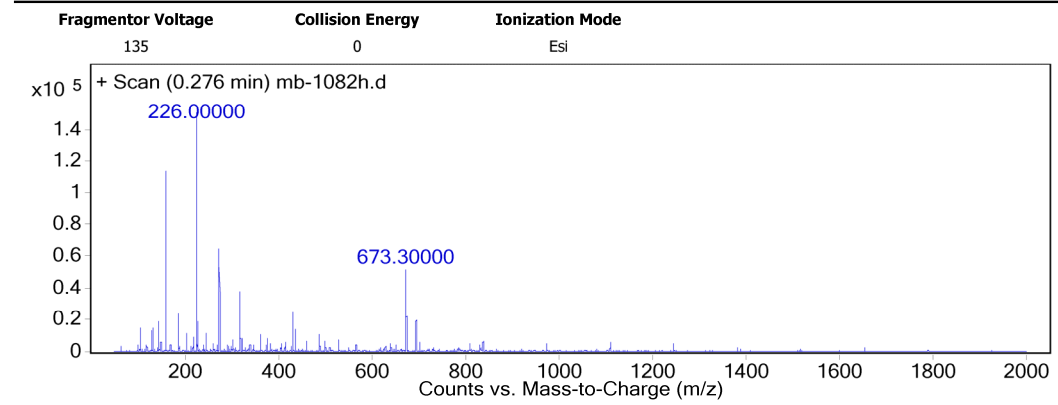

### Peak List

| $m/z$ | $z$ | Abund. |
|-------|-----|--------|
| 144   |     | 18578  |
| 158.9 |     | 114045 |
| 186.9 |     | 23781  |
| 226   | 1   | 149993 |
| 274.2 |     | 64521  |
| 318.1 |     | 37732  |
| 430.7 |     | 24489  |
| 673.3 | 1   | 51295  |
| 674.3 | 1   | 21648  |
| 695.2 | 1   | 19486  |

| Fragmentor Voltage | Collision Energy | Ionization Mode |
|--------------------|------------------|-----------------|
| 135                | 0                | Esi             |

Trp-Ile-Har-Trp-NH<sub>2</sub>;

$$[\text{M}+\text{H}]^+_{\text{found}} = 673.3, [\text{M}+\text{H}]^+_{\text{calculated}} = 673.4$$

Trp-Trp-Orn-OH

$$[\text{M}+4\text{HOAc}+\text{TFA}+2\text{H}]^{2+}_{\text{found}} = 430.7, [\text{M}+4\text{HOAc}+\text{TFA}+2\text{H}]^{2+}_{\text{calculated}} = 430.1$$

continued in next page

### User Spectra

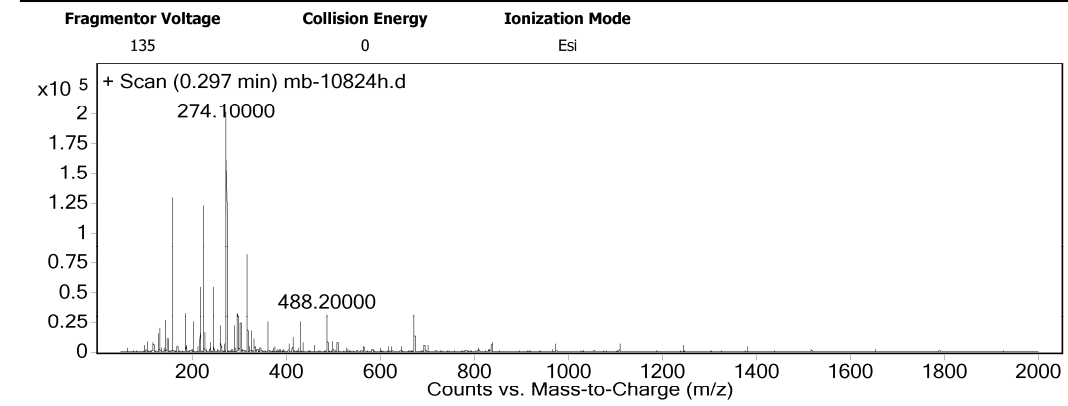

### Peak List

| <i>m/z</i> | <b>z</b> | <b>Abund.</b> |
|------------|----------|---------------|
| 158.9      |          | 129238        |
| 187        |          | 32472         |
| 218.1      |          | 54361         |
| 226        | 1        | 122973        |
| 246.1      |          | 54630         |
| 274.1      |          | 200416        |
| 275.2      |          | 33953         |
| 298.2      |          | 32169         |
| 318.1      | 1        | 81798         |
| 488.2      |          | 31792         |

Trp-Trp-Orn-Trp-Ile-Har-OH;

$$[M+2H]^{2+}_{\text{found}} = 488.2, [M+2H]^{2+}_{\text{calculated}} = 487.8$$

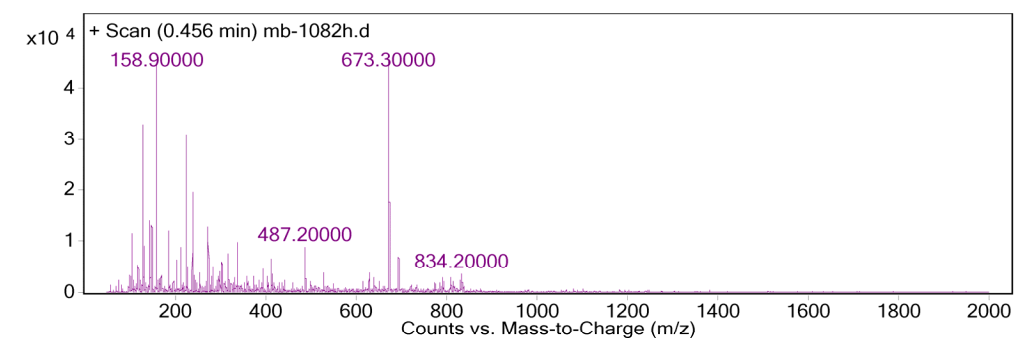

Peak List

| m/z   | z | Abund. |
|-------|---|--------|
| 130.1 |   | 32844  |
| 144   |   | 13946  |
| 148.9 |   | 13061  |
| 158.9 |   | 44868  |
| 187   |   | 12020  |
| 226   | 1 | 30920  |
| 238.9 | 1 | 19617  |
| 274.1 | 1 | 12622  |
| 673.3 |   | 45282  |
| 674.2 |   | 17375  |

9

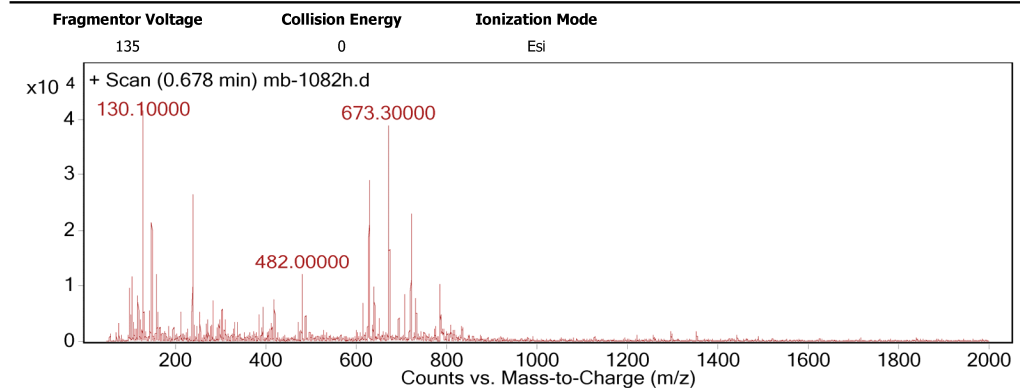

Peak List

| m/z   | z | Abund. |
|-------|---|--------|
| 105.1 |   | 11720  |
| 130.1 | 1 | 41510  |
| 148.9 | 1 | 21319  |
| 159   |   | 12172  |
| 238.9 |   | 26234  |
| 482   |   | 12155  |
| 629.9 |   | 29021  |
| 673.3 | 1 | 38920  |
| 674.3 | 1 | 16672  |
| 722.5 |   | 22885  |

Orn-Har-Trp-Trp-Orn-Trp-Ile-Har-OH;

$[M+2H]^{2+}_{\text{found}} = 629.9$ ,  $[M+2H]^{2+}_{\text{calculated}} = 629.9$

Har-Trp-Trp-Orn-Trp-Ile-Har-OH;

$[M+5\text{HOAc}+3H]^{3+}_{\text{found}} = 482.0$ ,  $[M+5\text{HOAc}+3H]^{3+}_{\text{calculated}} = 482.2$

Trp-Trp-Orn-Trp-Ile-Har-OH;

$[M+2H]^{2+}_{\text{found}} = 487.2$ ,  $[M+2H]^{2+}_{\text{calculated}} = 487.8$

Trp-Ile-Har-Trp-NH<sub>2</sub>;

$[M+H]^+_{\text{found}} = 673.3$ ,  $[M+H]^+_{\text{calculated}} = 673.3$

Trp-Ile-Har-OH

$[M+2HOAc+TFA+H]^+_{\text{found}} = 722.5, [M+2HOAc+TFA+H]^+_{\text{calculated}} = 722.3$

User Spectra

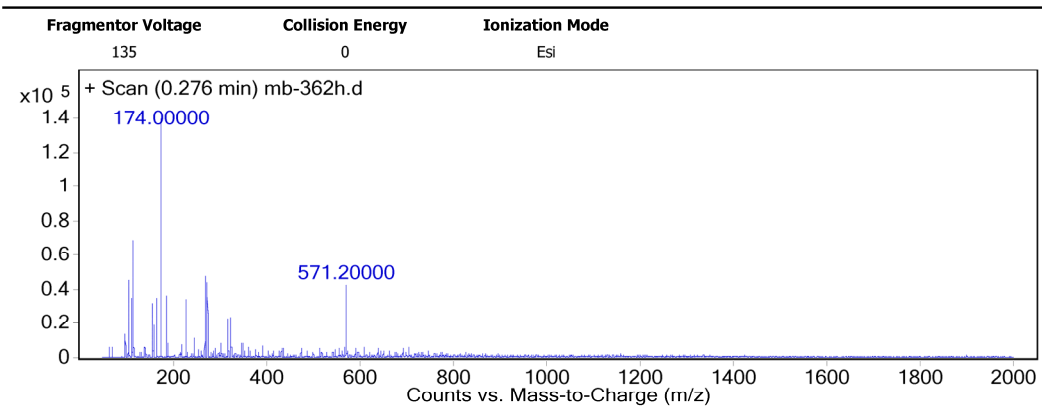

Peak List

| m/z   | z | Abund. |
|-------|---|--------|
| 104.9 |   | 44913  |
| 112   |   | 34323  |
| 115   |   | 68670  |
| 164.9 |   | 34488  |
| 174   | 1 | 139034 |
| 186.8 |   | 35878  |
| 228.9 |   | 33600  |
| 268.9 |   | 47772  |
| 274.1 | 1 | 43597  |
| 571.2 | 1 | 42278  |

not detectable

User Spectra

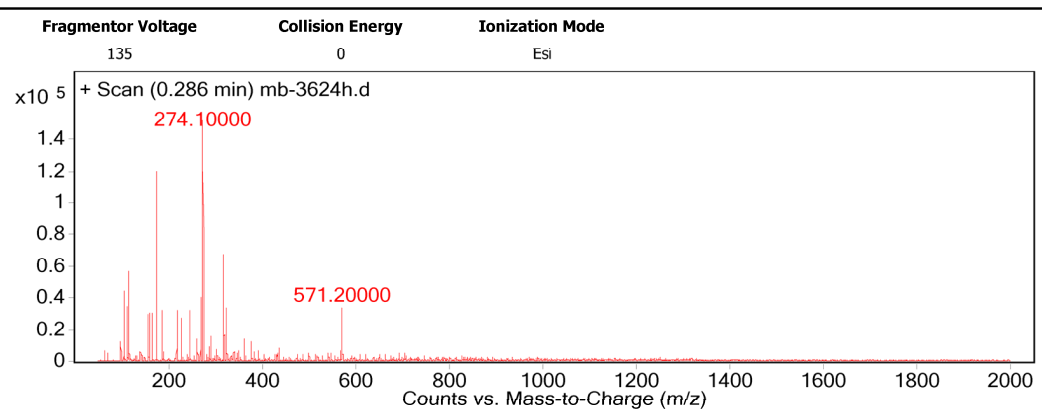

Peak List

| m/z   | z | Abund. |
|-------|---|--------|
| 105   |   | 44320  |
| 112   |   | 34119  |
| 115   |   | 56881  |
| 174   | 1 | 120091 |
| 246.1 |   | 32379  |
| 268.9 |   | 40174  |
| 274.1 |   | 151502 |
| 318.1 |   | 66843  |
| 322.8 |   | 33631  |
| 571.2 |   | 33841  |

not detectable

User Spectra

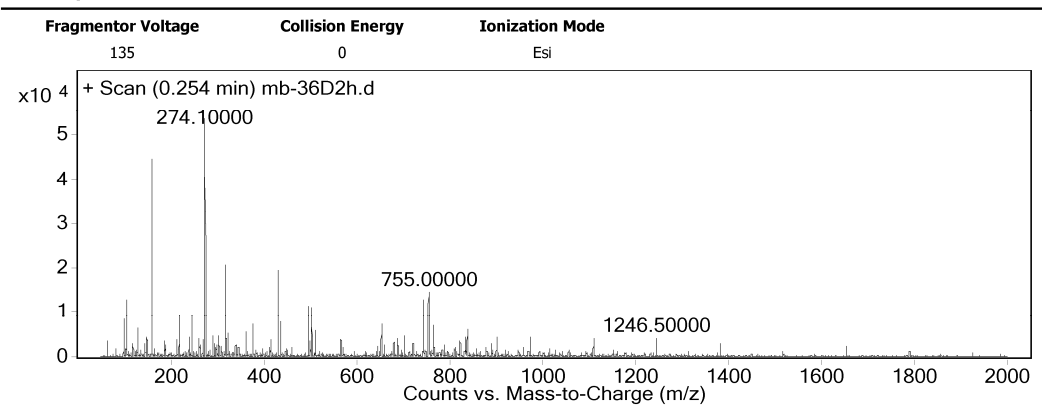

Peak List

| m/z   | Abund. |
|-------|--------|
| 105   | 12700  |
| 158.9 | 44555  |
| 274.1 | 53511  |
| 275.2 | 12037  |
| 318.1 | 20657  |
| 430.8 | 19412  |
| 496.5 | 11372  |
| 503.7 | 10988  |
| 744   | 12604  |
| 755   | 14479  |

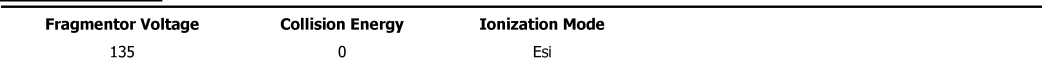

User Spectra

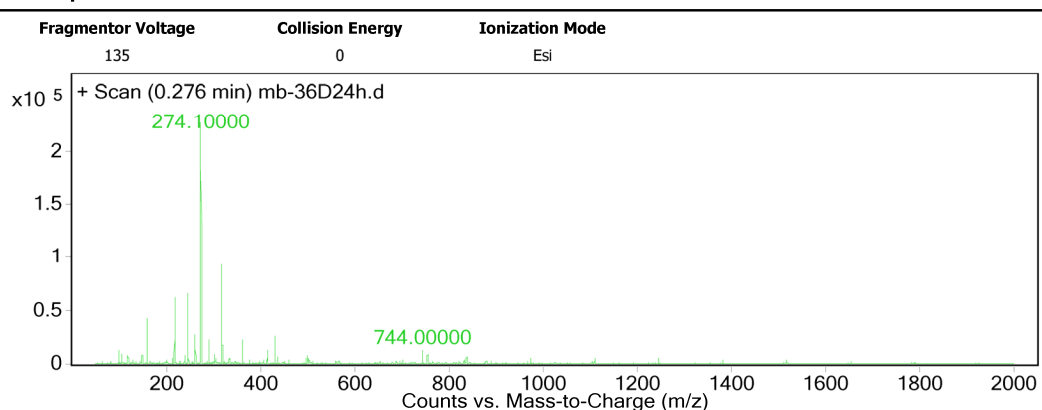

Peak List

| m/z   | z | Abund. |
|-------|---|--------|
| 158.9 |   | 43194  |
| 218.1 |   | 62435  |
| 246.1 |   | 66799  |
| 262.1 |   | 27273  |
| 274.1 |   | 226489 |
| 275.2 |   | 37674  |
| 290.2 |   | 21976  |
| 318.2 | 1 | 93508  |
| 362.2 |   | 21850  |
| 430.8 |   | 25967  |

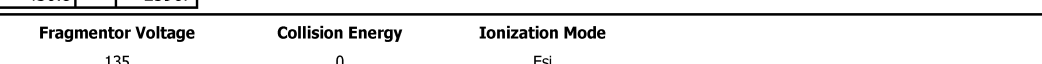



continued in next page

Intact **11**;

$[M+2H]^{2+}_{\text{found}} = 744.0, [M+2H]^{2+}_{\text{calculated}} = 743.9$

$[M+3H]^{3+}_{\text{found}} = 496.5, [M+3H]^{3+}_{\text{calculated}} = 496.3$

$[M+3\text{HOAc}+3\text{TFA}+4H]^{4+}_{\text{found}} = 503.7, [M+3\text{HOAc}+3\text{TFA}+4H]^{4+}_{\text{calculated}} = 503.0$

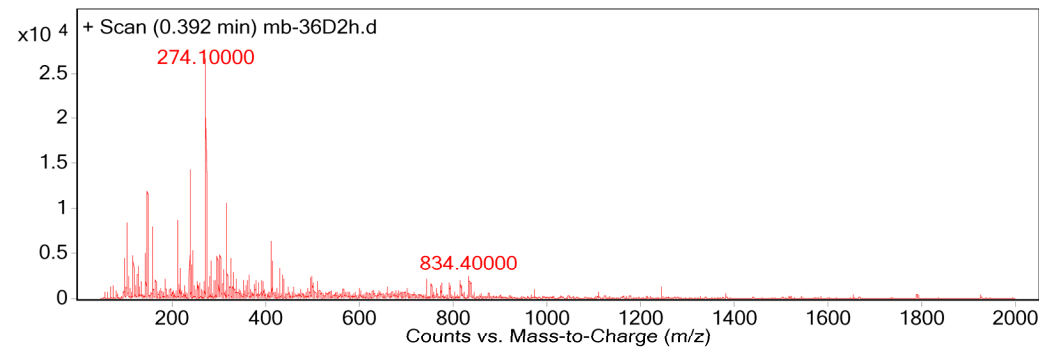

Peak List

| m/z   | z | Abund. |
|-------|---|--------|
| 104.9 |   | 8413   |
| 148.9 |   | 11849  |
| 158.8 |   | 7933   |
| 214.1 | 1 | 8696   |
| 238.9 |   | 14318  |
| 246.1 |   | 5335   |
| 274.1 |   | 26652  |
| 275.2 |   | 5903   |
| 318.2 |   | 10523  |
| 413   |   | 6388   |

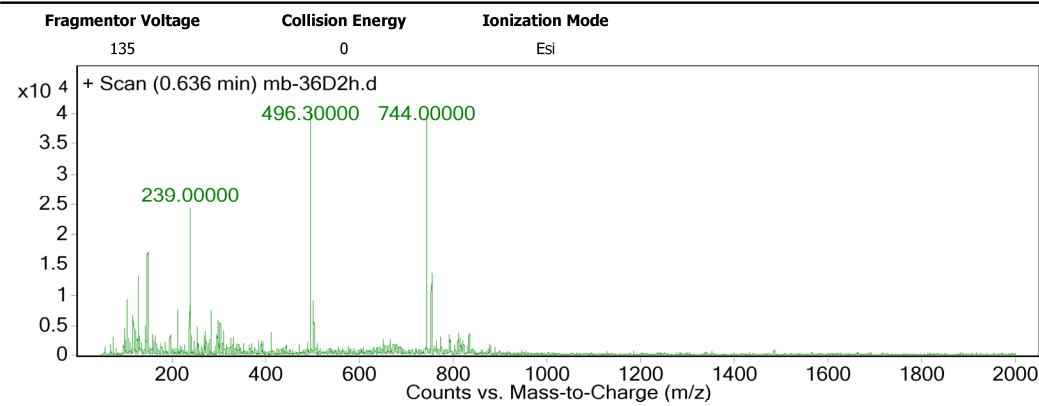

Peak List

| m/z   | z | Abund. |
|-------|---|--------|
| 105   |   | 9305   |
| 130.1 | 1 | 13058  |
| 149   |   | 16925  |
| 214.1 |   | 7493   |
| 239   |   | 24260  |
| 284.1 | 1 | 7491   |
| 496.3 |   | 39770  |
| 503.6 |   | 9120   |
| 744   |   | 39527  |
| 755.1 | 1 | 13519  |

continued in next page

Intact **11**;

$[M+2H]^{2+}_{\text{found}} = 744.0, [M+2H]^{2+}_{\text{calculated}} = 743.9$

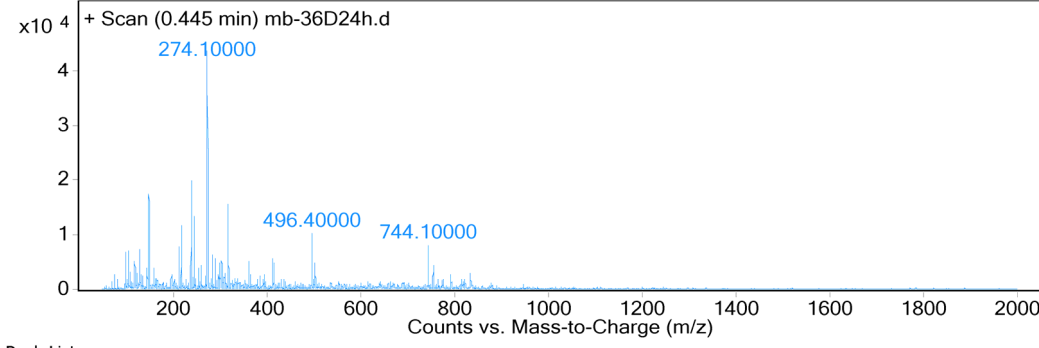

Peak List

| m/z   | z | Abund. |
|-------|---|--------|
| 148.9 | 1 | 17284  |
| 214.1 |   | 7729   |
| 218.1 |   | 11631  |
| 238.9 |   | 19844  |
| 246.1 |   | 13108  |
| 274.1 | 1 | 43637  |
| 275.1 | 1 | 8248   |
| 318.2 |   | 15704  |
| 496.4 |   | 10250  |
| 744.1 | 2 | 8095   |

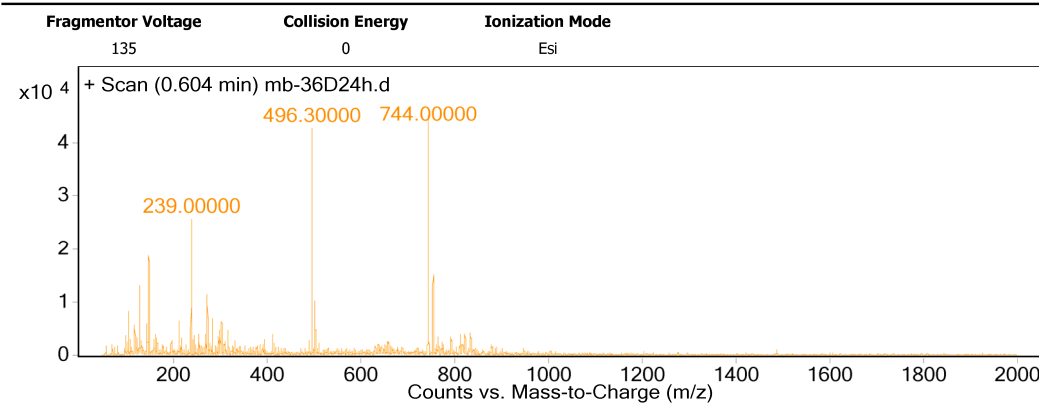

Peak List

| m/z   | z | Abund. |
|-------|---|--------|
| 105   |   | 8259   |
| 130   |   | 13118  |
| 148.9 |   | 18449  |
| 239   |   | 25597  |
| 274.2 | 1 | 11483  |
| 284.1 |   | 6914   |
| 496.3 |   | 42725  |
| 503.6 |   | 10218  |
| 744   |   | 45063  |
| 755   |   | 15130  |

12

$$[\text{M}+3\text{HOAc}+3\text{TFA}+4\text{H}]^{4+}_{\text{found}} = 503.6, [\text{M}+3\text{HOAc}+3\text{TFA}+4\text{H}]^{4+}_{\text{calculated}} = 503.0$$

Fragmentor Voltage 135 Collision Energy 0 Ionization Mode ESI

+ Scan (0.254 min) mb-36RI-2h.d

274.10000

744.00000

1110.50000

1382.70000

Counts vs. Mass-to-Charge (m/z)

|                    |                  |                 |
|--------------------|------------------|-----------------|
| 755                | 1227             |                 |
| Fragmentor Voltage | Collision Energy | Ionization Mode |
| 135                | 0                | Esi             |

$$[\text{M}+3\text{HOAc}+3\text{TFA}+4\text{H}]^{4+}_{\text{found}} = 503.7, [\text{M}+3\text{HOAc}+3\text{TFA}+4\text{H}]^{4+}_{\text{calculated}} = 503.0$$
$$[\text{M}+3\text{HOAc}+3\text{TFA}+4\text{H}]^{4+}_{\text{found}} = 503.6, [\text{M}+3\text{HOAc}+3\text{TFA}+4\text{H}]^{4+}_{\text{calculated}} = 503.0$$
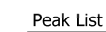

Fragmentor Voltage: 135 Collision Energy: 0 Ionization Mode: Esi

+ Scan (0.625 min) mb-36RI-24h.d

Mass spectrum plot showing relative intensity (x10<sup>4</sup>) versus mass-to-charge ratio (m/z). The x-axis ranges from 0 to 2000 m/z. The y-axis ranges from 0 to 4 x10<sup>4</sup>. Three major peaks are labeled with their m/z values: 239.00000, 496.40000, and 744.00000. The peak at 744.00000 is the base peak with the highest intensity.

## Peak List

| $m/z$ | $z$ | Abund. |
|-------|-----|--------|
| 105   |     | 9906   |
| 130.1 |     | 13683  |
| 148.9 | 1   | 20845  |
| 214.1 |     | 6850   |
| 239   |     | 27078  |
| 274.1 | 1   | 13635  |
| 496.4 |     | 39813  |
| 503.7 |     | 10071  |
| 744   |     | 45170  |
| 755   |     | 14388  |

$$[\text{M}+3\text{H}]^{3+}_{\text{found}} = 496.4, [\text{M}+3\text{H}]^{3+}_{\text{calculated}} = 496.3$$

$[M+3HOAc+3TFA+4H]^{4+}_{found} = 503.7, [M+3HOAc+3TFA+4H]^{4+}_{calculated} = 503.0$

continued in next page

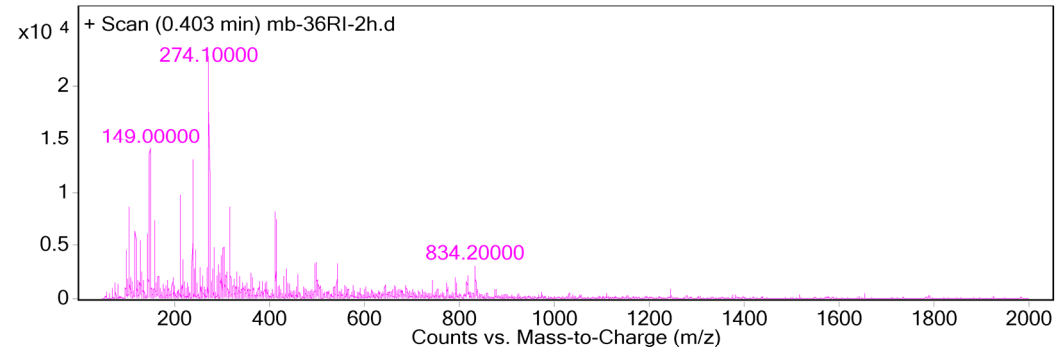

12

Peak List

| m/z   | z | Abund. |
|-------|---|--------|
| 105   | 1 | 8599   |
| 119.1 |   | 6241   |
| 149   |   | 13999  |
| 158.8 |   | 7288   |
| 214.2 |   | 9710   |
| 239   | 1 | 13106  |
| 274.1 | 1 | 22745  |
| 318.2 |   | 8567   |
| 413.1 |   | 8173   |
| 415   | 1 | 7445   |

Intact 12;

$[M+3HOAc+2H]^{2+}_{found} = 834.2, [M+3HOAc+2H]^{2+}_{calculated} = 833.9$

User Spectra

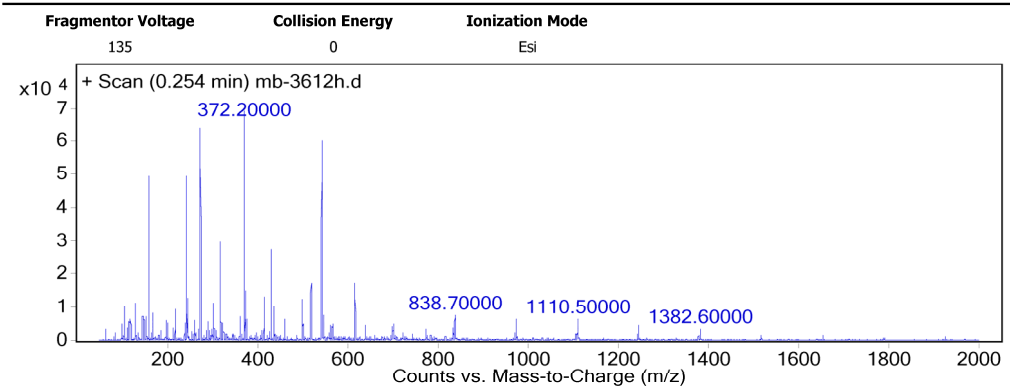

13

Peak List

| m/z   | z | Abund. |
|-------|---|--------|
| 158.9 |   | 49406  |
| 244.1 |   | 49392  |
| 274.1 | 1 | 63981  |
| 318.2 |   | 29443  |
| 372.2 | 1 | 69040  |
| 430.8 |   | 27398  |
| 519.2 |   | 17232  |
| 543.2 | 1 | 60078  |
| 544.2 | 1 | 20240  |
| 617.2 |   | 17232  |

Trp-Trp-Arg-Trp-Trp-Lys-Lys-NH<sub>2</sub>;

$[M+HOAc+2H]^{2+}_{found} = 617.2, [M+HOAc+2H]^{2+}_{calculated} = 617.8$

not determined

14

Trp-Trp-Arg-Trp-Trp-Lys-OH;  
 $[M+HOAc+5TFA+2H]^{2+}_{found} = 838.7$ ,  $[M+HOAc+5TFA+2H]^{2+}_{calculated} = 839.3$   
Trp-Trp-Lys-OH  
 $[M+H]^+_{found} = 519.2$ ,  $[M+H]^+_{calculated} = 519.3$   
**User Spectra**

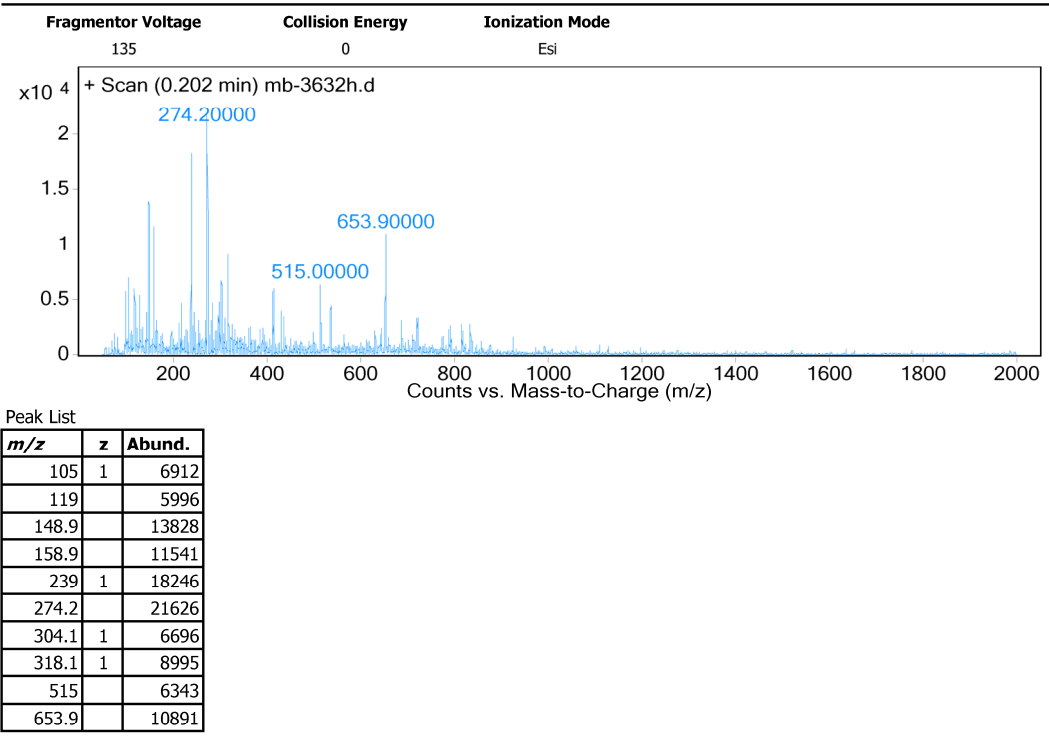

Fragmentor Voltage: 135, Collision Energy: 0, Ionization Mode: Esi

Intact **14**;  
 $[M+4HOAc+4TFA+3H]^{3+}_{found} = 653.9$ ,  $[M+4HOAc+4TFA+3H]^{3+}_{calculated} = 653.6$

continued in next page

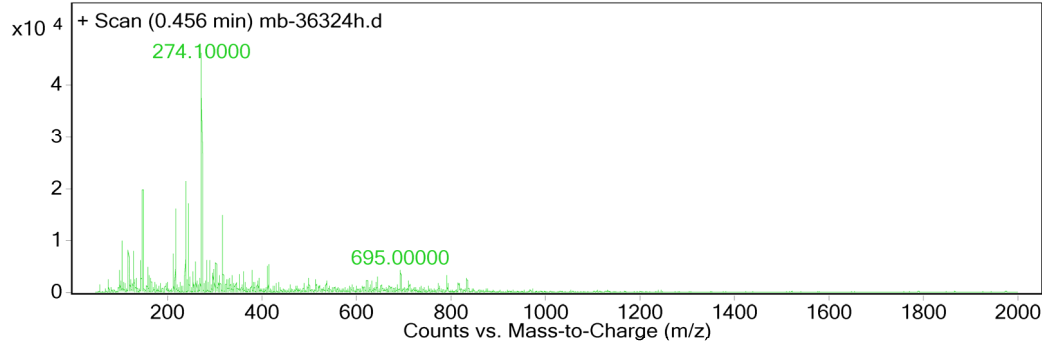

Peak List

| m/z   | z | Abund. |
|-------|---|--------|
| 105   | 1 | 10080  |
| 119.1 |   | 8041   |
| 130   |   | 8123   |
| 149   |   | 19830  |
| 218.1 | 1 | 16086  |
| 239   | 1 | 21594  |
| 246.1 |   | 16917  |
| 274.1 | 1 | 46206  |
| 275.1 | 1 | 10225  |
| 318.2 |   | 14637  |

Dab-Trp-Trp-Dab-Trp-Trp-Dab-NH<sub>2</sub>;  
 $[M+2TFA+2H]^{2+}_{found} = 695.0$ ,  $[M+2TFA+2H]^{2+}_{calculated} = 695.9$

14

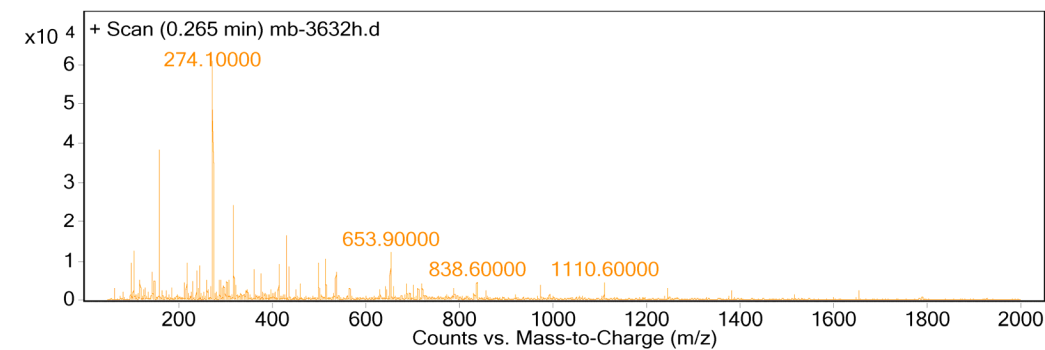

Peak List

| m/z   | z | Abund. |
|-------|---|--------|
| 104.9 |   | 12476  |
| 158.9 |   | 38270  |
| 218   |   | 9530   |
| 274.1 |   | 60814  |
| 275.2 |   | 11339  |
| 318.1 | 1 | 24482  |
| 430.8 |   | 16521  |
| 500.1 | 1 | 9535   |
| 515.1 |   | 10651  |
| 653.9 |   | 12090  |

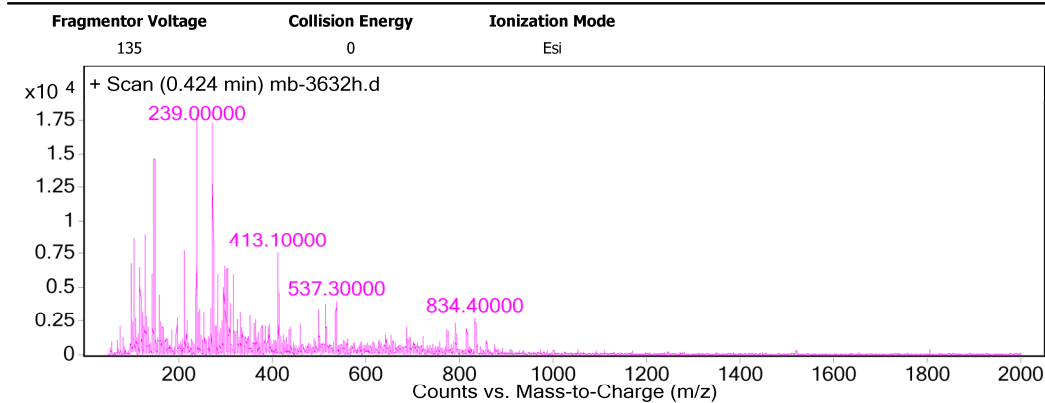

Peak List

| m/z   | z | Abund. |
|-------|---|--------|
| 99    |   | 6752   |
| 105   |   | 8740   |
| 118.9 |   | 6512   |
| 130.1 |   | 8939   |
| 149   |   | 14635  |
| 214.2 |   | 7778   |
| 239   | 1 | 17853  |
| 274.1 | 1 | 17286  |
| 300.9 |   | 6617   |
| 413.1 | 1 | 7494   |

Intact **14**;

$$[M+5\text{HOAc}+\text{TFA}+2\text{H}]^{2+}_{\text{found}} = 838.6, [M+5\text{HOAc}+\text{TFA}+2\text{H}]^{2+}_{\text{calculated}} = 838.9$$

$$[M+2\text{HOAc}+2\text{TFA}+3\text{H}]^{3+}_{\text{found}} = 537.3, [M+2\text{HOAc}+2\text{TFA}+3\text{H}]^{3+}_{\text{calculated}} = 537.6$$

| Fragmentor Voltage | Collision Energy | Ionization Mode |
|--------------------|------------------|-----------------|
| 135                | 0                | Esi             |

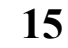

| Fragmentor Voltage | Collision Energy | Ionization Mode |
|--------------------|------------------|-----------------|
| 135                | 0                | Esi             |

$$[\text{M}+\text{HOAc}+\text{TFA}+2\text{H}]^{2+}_{\text{found}} = 640.2, [\text{M}+\text{HOAc}+\text{TFA}+2\text{H}]^{2+}_{\text{calculated}} = 639.8$$
$$[\text{M}+\text{HOAc}+\text{TFA}+\text{H}]^+_{\text{found}} = 680.3, [\text{M}+\text{HOAc}+\text{TFA}+\text{H}]^+_{\text{calculated}} = 679.6$$

not determined

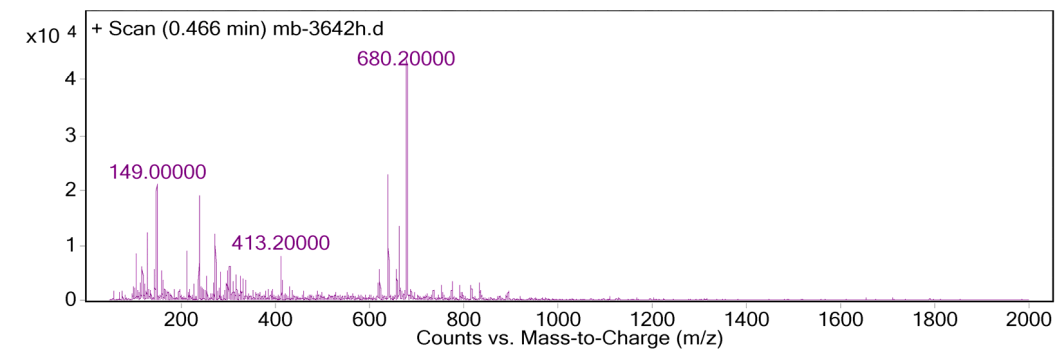

Peak List

| m/z   | z | Abund. |
|-------|---|--------|
| 130   |   | 12303  |
| 149   |   | 20908  |
| 214.1 |   | 8900   |
| 239   |   | 19033  |
| 274.2 |   | 12059  |
| 640.3 |   | 22762  |
| 641.2 | 1 | 11760  |
| 663.3 |   | 13416  |
| 680.2 |   | 43540  |
| 681.3 | 1 | 19795  |

15

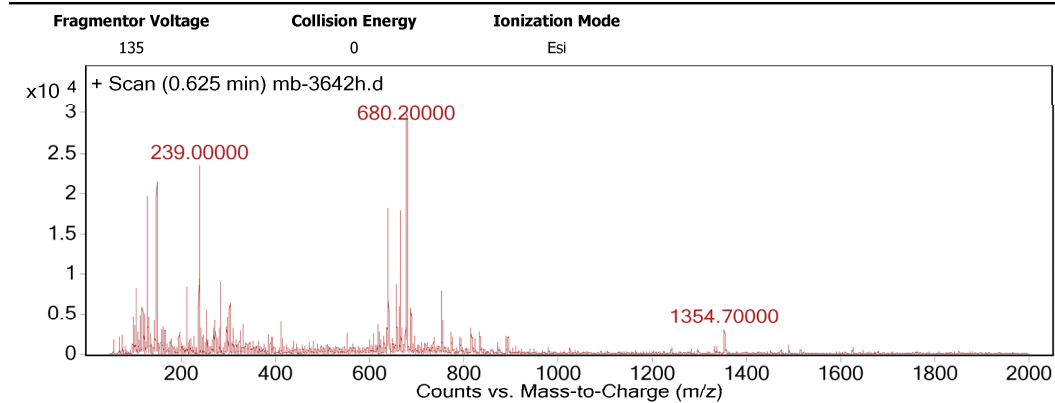

Peak List

| m/z   | z | Abund. |
|-------|---|--------|
| 130.1 | 1 | 19591  |
| 149   |   | 21385  |
| 214.1 |   | 8326   |
| 239   | 1 | 23443  |
| 284.1 | 1 | 9027   |
| 640.2 | 1 | 18154  |
| 658.4 |   | 8640   |
| 666.9 |   | 17781  |
| 680.2 | 1 | 29717  |
| 681.2 | 1 | 13959  |

Orn-Trp-Trp-Orn-Trp-Trp-Orn-Orn-NH<sub>2</sub>;

$[M+TFA+2H]^{2+}_{\text{found}} = 666.9$ ,  $[M+TFA+2H]^{2+}_{\text{calculated}} = 666.9$

Trp-Trp-Orn-Trp-Trp-Orn-Orn-NH<sub>2</sub>;

$[M+HOAc+TFA+2H]^{2+}_{\text{found}} = 640.3$ ,  $[M+HOAc+TFA+2H]^{2+}_{\text{calculated}} = 639.8$

Trp-Trp-Orn-OH

$[M+HOAc+TFA+H]^+_{\text{found}} = 680.2$ ,  $[M+HOAc+TFA+H]^+_{\text{calculated}} = 679.6$

continued in next page

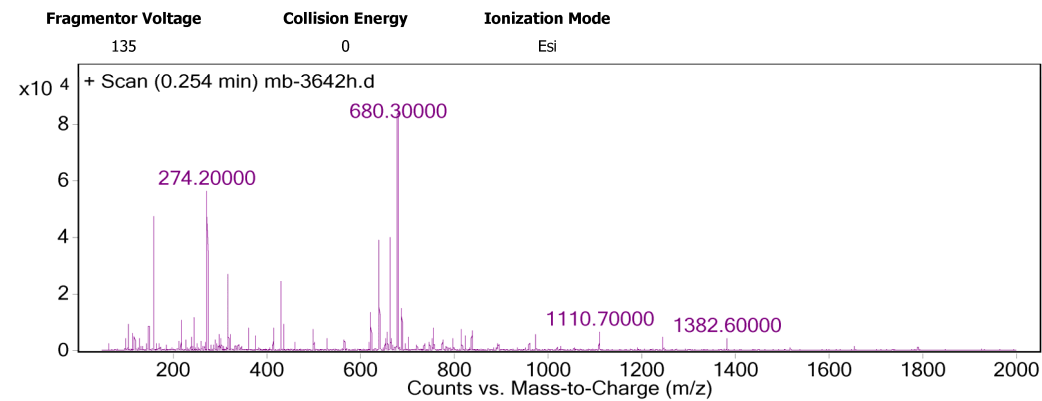

Peak List

| <i>m/z</i> | <i>z</i> | Abund. |
|------------|----------|--------|
| 158.9      |          | 47573  |
| 274.2      |          | 56424  |
| 318.1      | 1        | 27324  |
| 430.8      |          | 24628  |
| 640.2      |          | 39148  |
| 641.3      |          | 16785  |
| 663.2      |          | 39965  |
| 664.3      |          | 15356  |
| 680.3      | 1        | 84209  |
| 681.3      | 1        | 32535  |

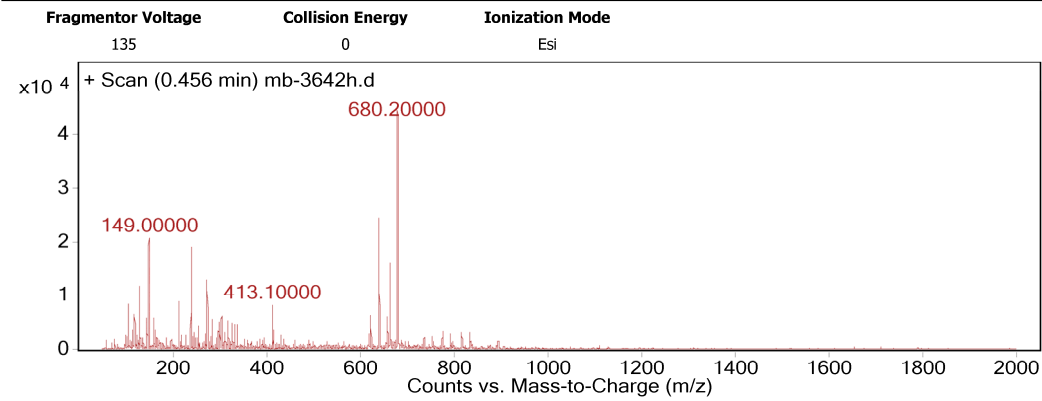

Peak List

| <i>m/z</i> | <i>z</i> | Abund. |
|------------|----------|--------|
| 130        |          | 11793  |
| 149        |          | 20537  |
| 214.2      |          | 8922   |
| 239        | 1        | 18835  |
| 274.2      |          | 13034  |
| 640.2      | 1        | 24351  |
| 641.2      | 1        | 12392  |
| 663.3      |          | 16151  |
| 680.2      |          | 44274  |

Trp-Trp-Orn-Trp-Trp-Orn-Orn-NH<sub>2</sub>;

[M+HOAc+TFA+2H]<sup>2+</sup><sub>found</sub> = 640.2, [M+HOAc+TFA+2H]<sup>2+</sup><sub>calculated</sub> = 639.8

Trp-Trp-Orn-OH

[M+HOAc+TFA+H]<sup>+</sup><sub>found</sub> = 680.2, [M+HOAc+TFA+H]<sup>+</sup><sub>calculated</sub> = 679.6

continued in next page



15

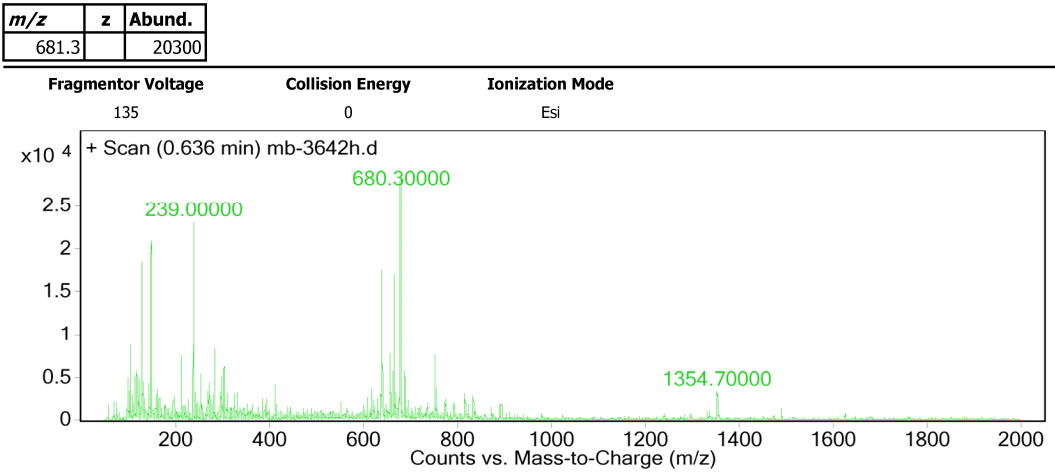

Peak List

| <i>m/z</i> | <i>z</i> | Abund. |
|------------|----------|--------|
| 105.1      |          | 8752   |
| 130.1      | 1        | 18471  |
| 149        |          | 20965  |
| 239        | 1        | 23024  |
| 284.1      | 1        | 8407   |
| 640.2      | 1        | 17534  |
| 641.2      | 1        | 7830   |
| 666.9      |          | 17049  |
| 680.3      |          | 28012  |
| 681.2      |          | 12378  |

Orn-Trp-Trp-Orn-Trp-Trp-Orn-Orn-NH<sub>2</sub>;  
[M+TFA+2H]<sup>2+</sup><sub>found</sub> = 666.9, [M+TFA+2H]<sup>2+</sup><sub>calculated</sub> = 666.9  
Trp-Trp-Orn-OH  
[M+HOAc+TFA+H]<sup>+</sup><sub>found</sub> = 680.3, [M+HOAc+TFA+H]<sup>+</sup><sub>calculated</sub> = 679.6

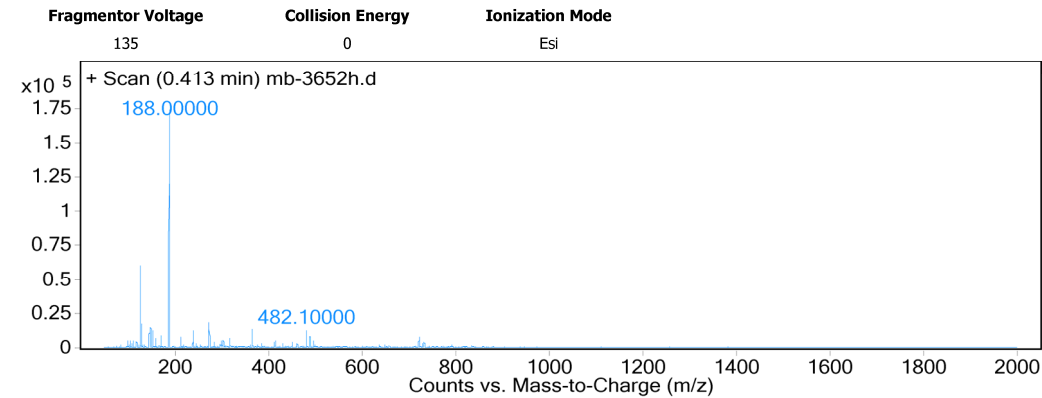

Peak List

| m/z   | z | Abund. |
|-------|---|--------|
| 126   |   | 60351  |
| 129   |   | 18184  |
| 148.9 |   | 15212  |
| 154   |   | 12995  |
| 188   | 1 | 173942 |
| 189   | 1 | 18031  |
| 239   |   | 13608  |
| 274.1 |   | 18946  |
| 365.6 |   | 13977  |
| 482.1 |   | 12858  |

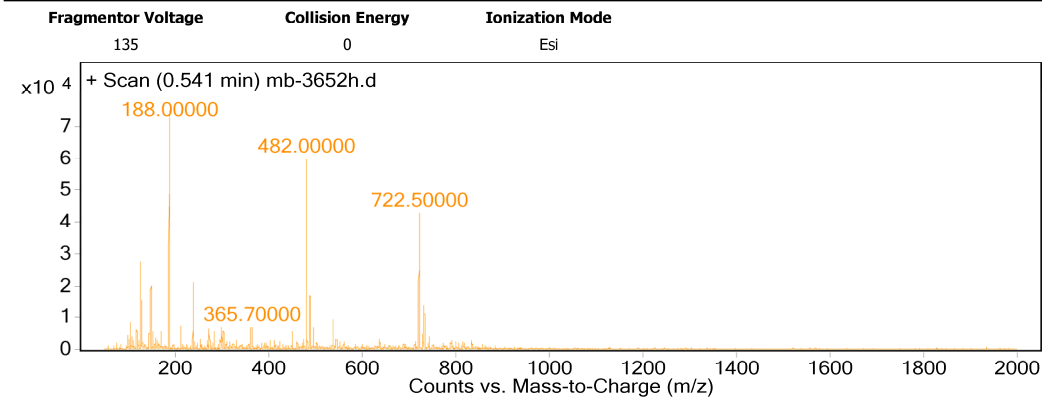

Peak List

| m/z   | z | Abund. |
|-------|---|--------|
| 126   |   | 27467  |
| 130   |   | 15580  |
| 149   |   | 19790  |
| 188   |   | 74769  |
| 239   |   | 21040  |
| 482   |   | 59862  |
| 489.3 |   | 16765  |
| 722.5 |   | 42756  |
| 733.5 | 2 | 13800  |

Har-Trp-Trp-Har-Trp-Trp-Har-Har-NH<sub>2</sub>  
[M+2H]<sup>2+</sup><sub>found</sub> = 722.5, [M+2H]<sup>2+</sup><sub>calculated</sub> = 721.9  
[M+3H]<sup>3+</sup><sub>found</sub> = 482.0, [M+3H]<sup>3+</sup><sub>calculated</sub> = 481.6  
Trp-Trp-Har-Trp-Trp-Har-OH;  
[M+3TFA+2H]<sup>2+</sup><sub>found</sub> = 722.5, [M+3TFA+2H]<sup>2+</sup><sub>calculated</sub> = 723.3  
[M+3TFA+3H]<sup>3+</sup><sub>found</sub> = 482.1, [M+3TFA+3H]<sup>3+</sup><sub>calculated</sub> = 482.5  
Trp-Trp-Har-OH;  
[M+HOAc+3TFA+2H]<sup>2+</sup><sub>found</sub> = 482.0, [M+HOAc+3TFA+2H]<sup>2+</sup><sub>calculated</sub> = 482.1

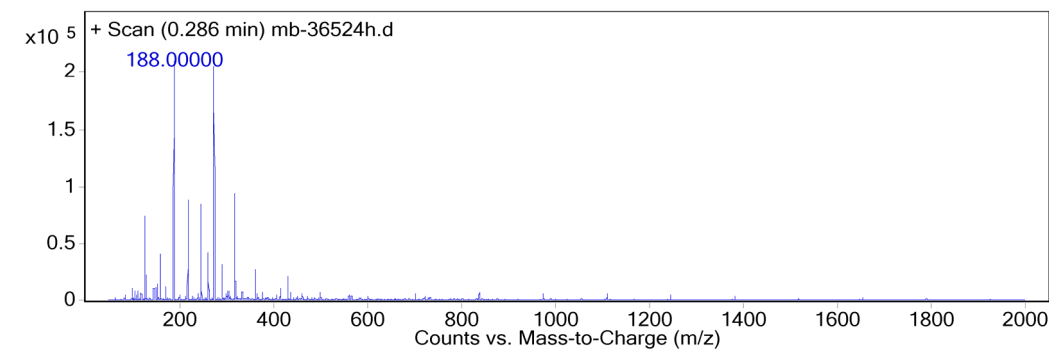

Peak List

| m/z   | z | Abund. |
|-------|---|--------|
| 126   |   | 74206  |
| 158.9 |   | 40544  |
| 188   | 1 | 209267 |
| 218.1 | 1 | 88428  |
| 246.1 | 1 | 84950  |
| 262.1 |   | 41827  |
| 274.1 | 1 | 205203 |
| 275.1 | 1 | 37247  |
| 290.1 |   | 31525  |
| 318.2 |   | 94437  |

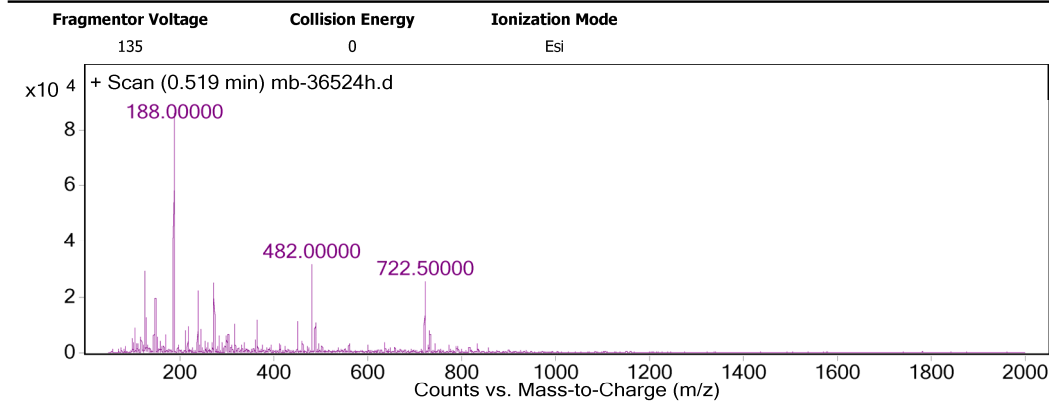

Peak List

| m/z   | z | Abund. |
|-------|---|--------|
| 126.1 |   | 29242  |
| 130.1 |   | 12620  |
| 149   |   | 19658  |
| 188   |   | 85881  |
| 238.9 |   | 22141  |
| 274.1 | 1 | 25242  |
| 365.8 |   | 11540  |
| 451.2 |   | 11218  |
| 482   |   | 31634  |
| 722.5 |   | 25793  |

Har-Trp-Trp-Har-Trp-Trp-Har-Har-NH<sub>2</sub>  
[M+2H]<sup>2+</sup><sub>found</sub> = 722.5, [M+2H]<sup>2+</sup><sub>calculated</sub> = 721.9  
[M+3H]<sup>3+</sup><sub>found</sub> = 482.0, [M+3H]<sup>3+</sup><sub>calculated</sub> = 481.6  
Trp-Trp-Har-Trp-Trp-Har-OH;  
[M+3TFA+2H]<sup>2+</sup><sub>found</sub> = 722.5, [M+3TFA+2H]<sup>2+</sup><sub>calculated</sub> = 723.3  
[M+3TFA+3H]<sup>3+</sup><sub>found</sub> = 482.1, [M+3TFA+3H]<sup>3+</sup><sub>calculated</sub> = 482.5  
Trp-Trp-Har-OH;  
[M+HOAc+3TFA+2H]<sup>2+</sup><sub>found</sub> = 482.0, [M+HOAc+3TFA+2H]<sup>2+</sup><sub>calculated</sub> = 482.1

16

| $m/z$ | $z$ | Abund. |
|-------|-----|--------|
| 105   |     | 8786   |
| 126.1 |     | 7853   |
| 130   | 1   | 12711  |
| 148.9 | 1   | 22254  |
| 188   |     | 20133  |
| 239   | 1   | 26364  |
| 284.2 |     | 8605   |
| 481.9 |     | 24837  |
| 722.5 | 2   | 22853  |
| 723   | 2   | 17229  |

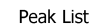

Har-Trp-Trp-Har-Trp-Trp-Har-Har-NH<sub>2</sub>  
 $[M+2H]^{2+}_{\text{found}} = 722.5$ ,  $[M+2H]^{2+}_{\text{calculated}} = 721.9$   
 $[M+3H]^{3+}_{\text{found}} = 481.9$ ,  $[M+3H]^{3+}_{\text{calculated}} = 481.6$   
 Trp-Trp-Har-Trp-Trp-Har-Har-NH<sub>2</sub>;  
 $[M+\text{HOAc}+\text{TFA}+2H]^{2+}_{\text{found}} = 723.0$ ,  $[M+\text{HOAc}+\text{TFA}+2H]^{2+}_{\text{calculated}} = 723.8$

17

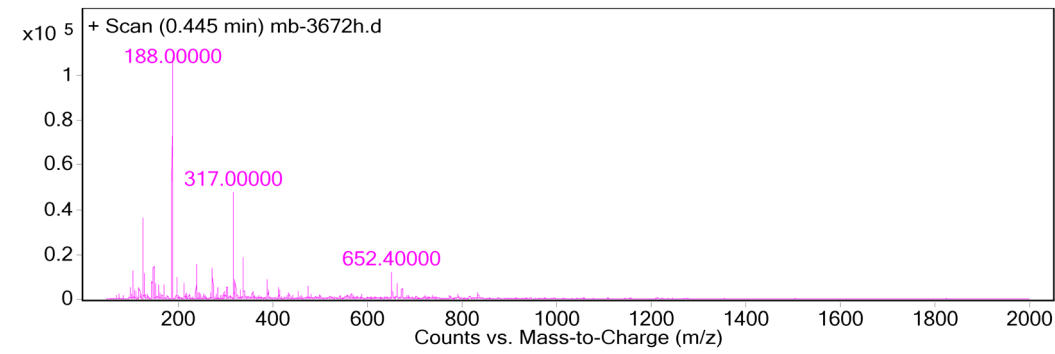

Peak List

| m/z   | z | Abund. |
|-------|---|--------|
| 104.9 |   | 13078  |
| 126   |   | 36271  |
| 149   |   | 14654  |
| 188   |   | 108014 |
| 238.9 |   | 15594  |
| 274.1 |   | 13797  |
| 317   | 1 | 47991  |
| 318   | 1 | 16663  |
| 339   |   | 18842  |
| 652.4 |   | 12271  |

Har-Trp-Trp-Dab-Trp-Trp-Har-Har-NH<sub>2</sub>;  
[M+4HOAc+3TFA+3H]<sup>3+</sup><sub>found</sub> = 652.4, [M+4HOAc+3TFA+3H]<sup>3+</sup><sub>calculated</sub> = 652.5

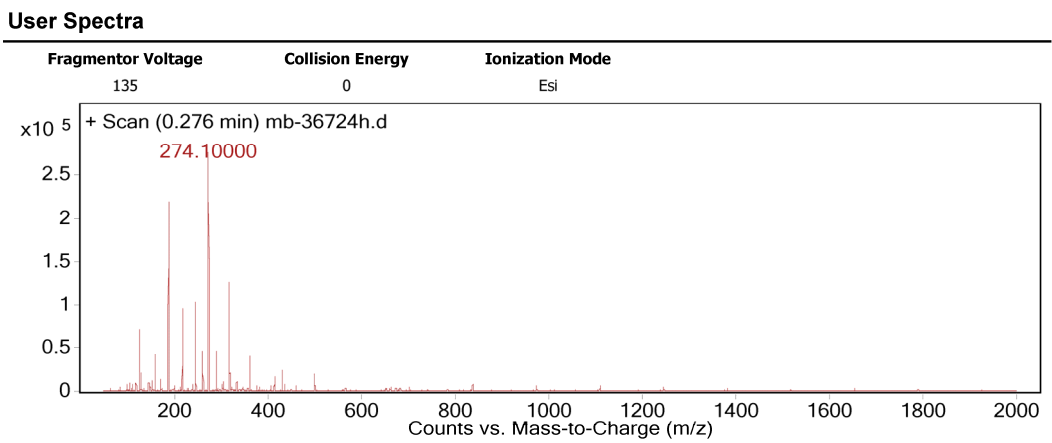

Peak List

| m/z   | z | Abund. |
|-------|---|--------|
| 126   |   | 72231  |
| 158.9 |   | 41894  |
| 188   |   | 219302 |
| 218.1 | 1 | 96189  |
| 246.2 |   | 103248 |
| 262.1 |   | 45554  |
| 274.1 |   | 275734 |
| 275.2 |   | 47507  |
| 290.1 |   | 46185  |
| 318.2 | 1 | 126357 |

not detectable

18

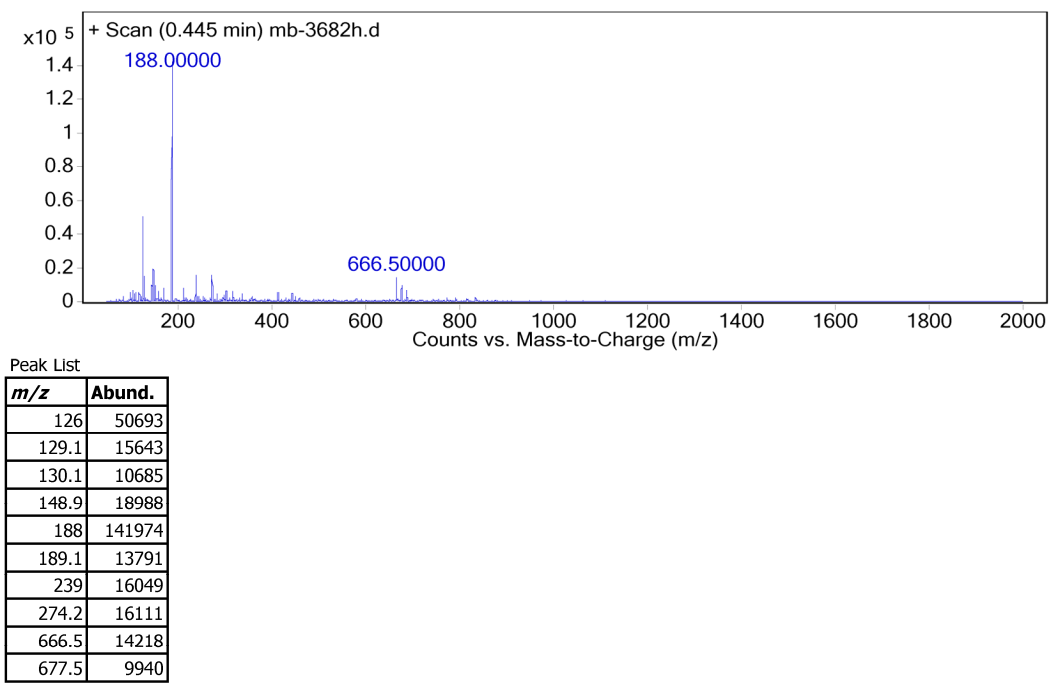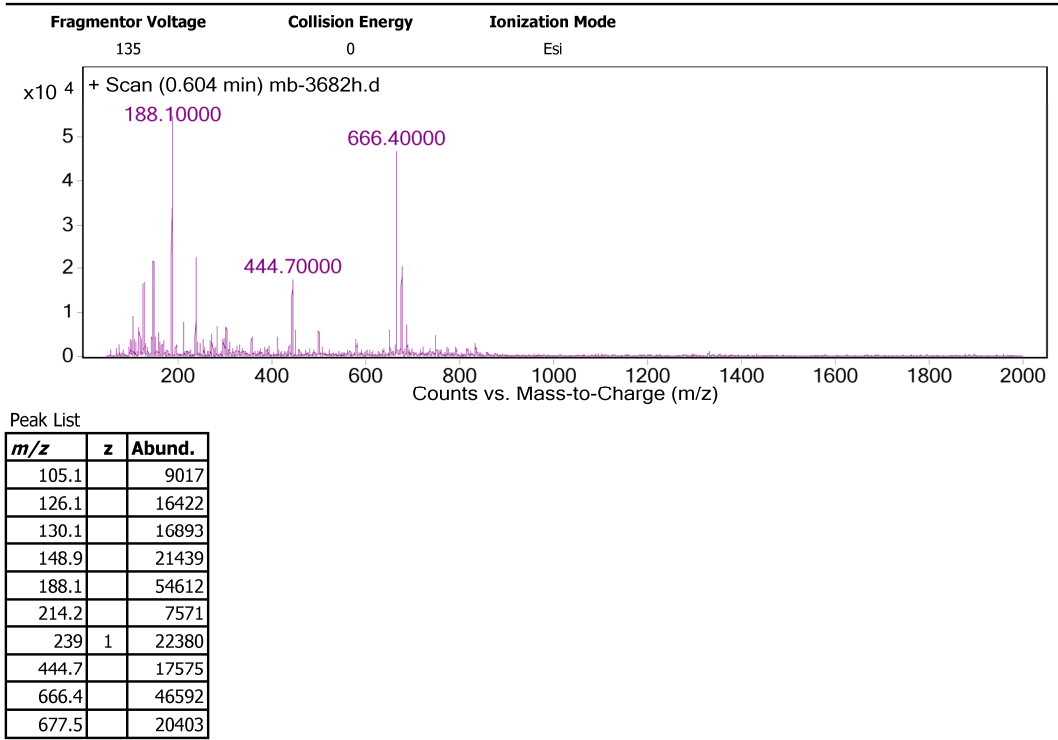

Trp-Trp-Orn-Trp-Trp-Har-Har-NH<sub>2</sub>  
[M+TFA+2H]<sup>2+</sup><sub>found</sub> = 666.4, [M+TFA+2H]<sup>2+</sup><sub>calculated</sub> = 666.2  
[M+TFA+3H]<sup>3+</sup><sub>found</sub> = 444.7, [M+TFA+3H]<sup>3+</sup><sub>calculated</sub> = 444.5

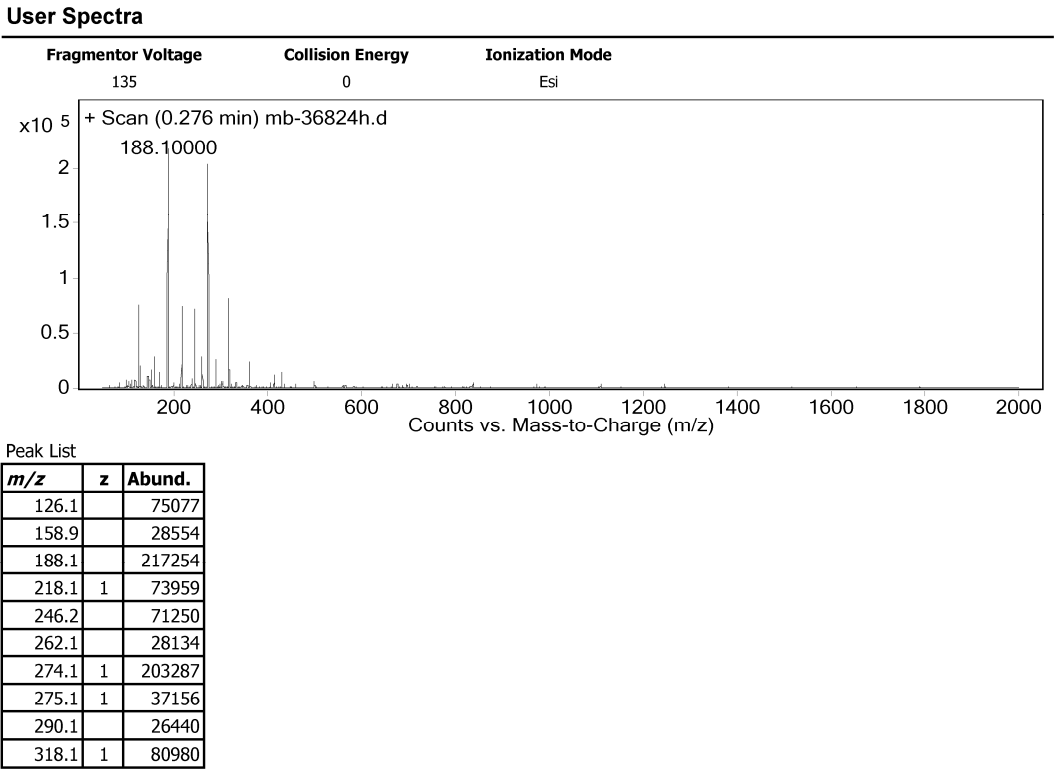

not detectable

**Figure S7.** The raw ITC data (power vs. time) and the integrated data for injection of the 1 and 10 derived peptides into the calorimeter cell containing trypsin at 310 °K. The fit parameters are  $\Delta H^\circ = -34.6 \text{ kJ.mol}^{-1}$ ,  $T\Delta S^\circ = -1.2 \text{ kJ.mol}^{-1}$ ,  $K^\circ = 2.4 \times 10^4 \text{ M}^{-1}$ ,  $n = 1.3$  for **11** and  $\Delta H^\circ = -49.4 \text{ kJ.mol}^{-1}$ ,  $T\Delta S^\circ = -3.3 \text{ kJ.mol}^{-1}$ ,  $K^\circ = 1.1 \times 10^4 \text{ M}^{-1}$ ,  $n = 0.7$  for **12**.

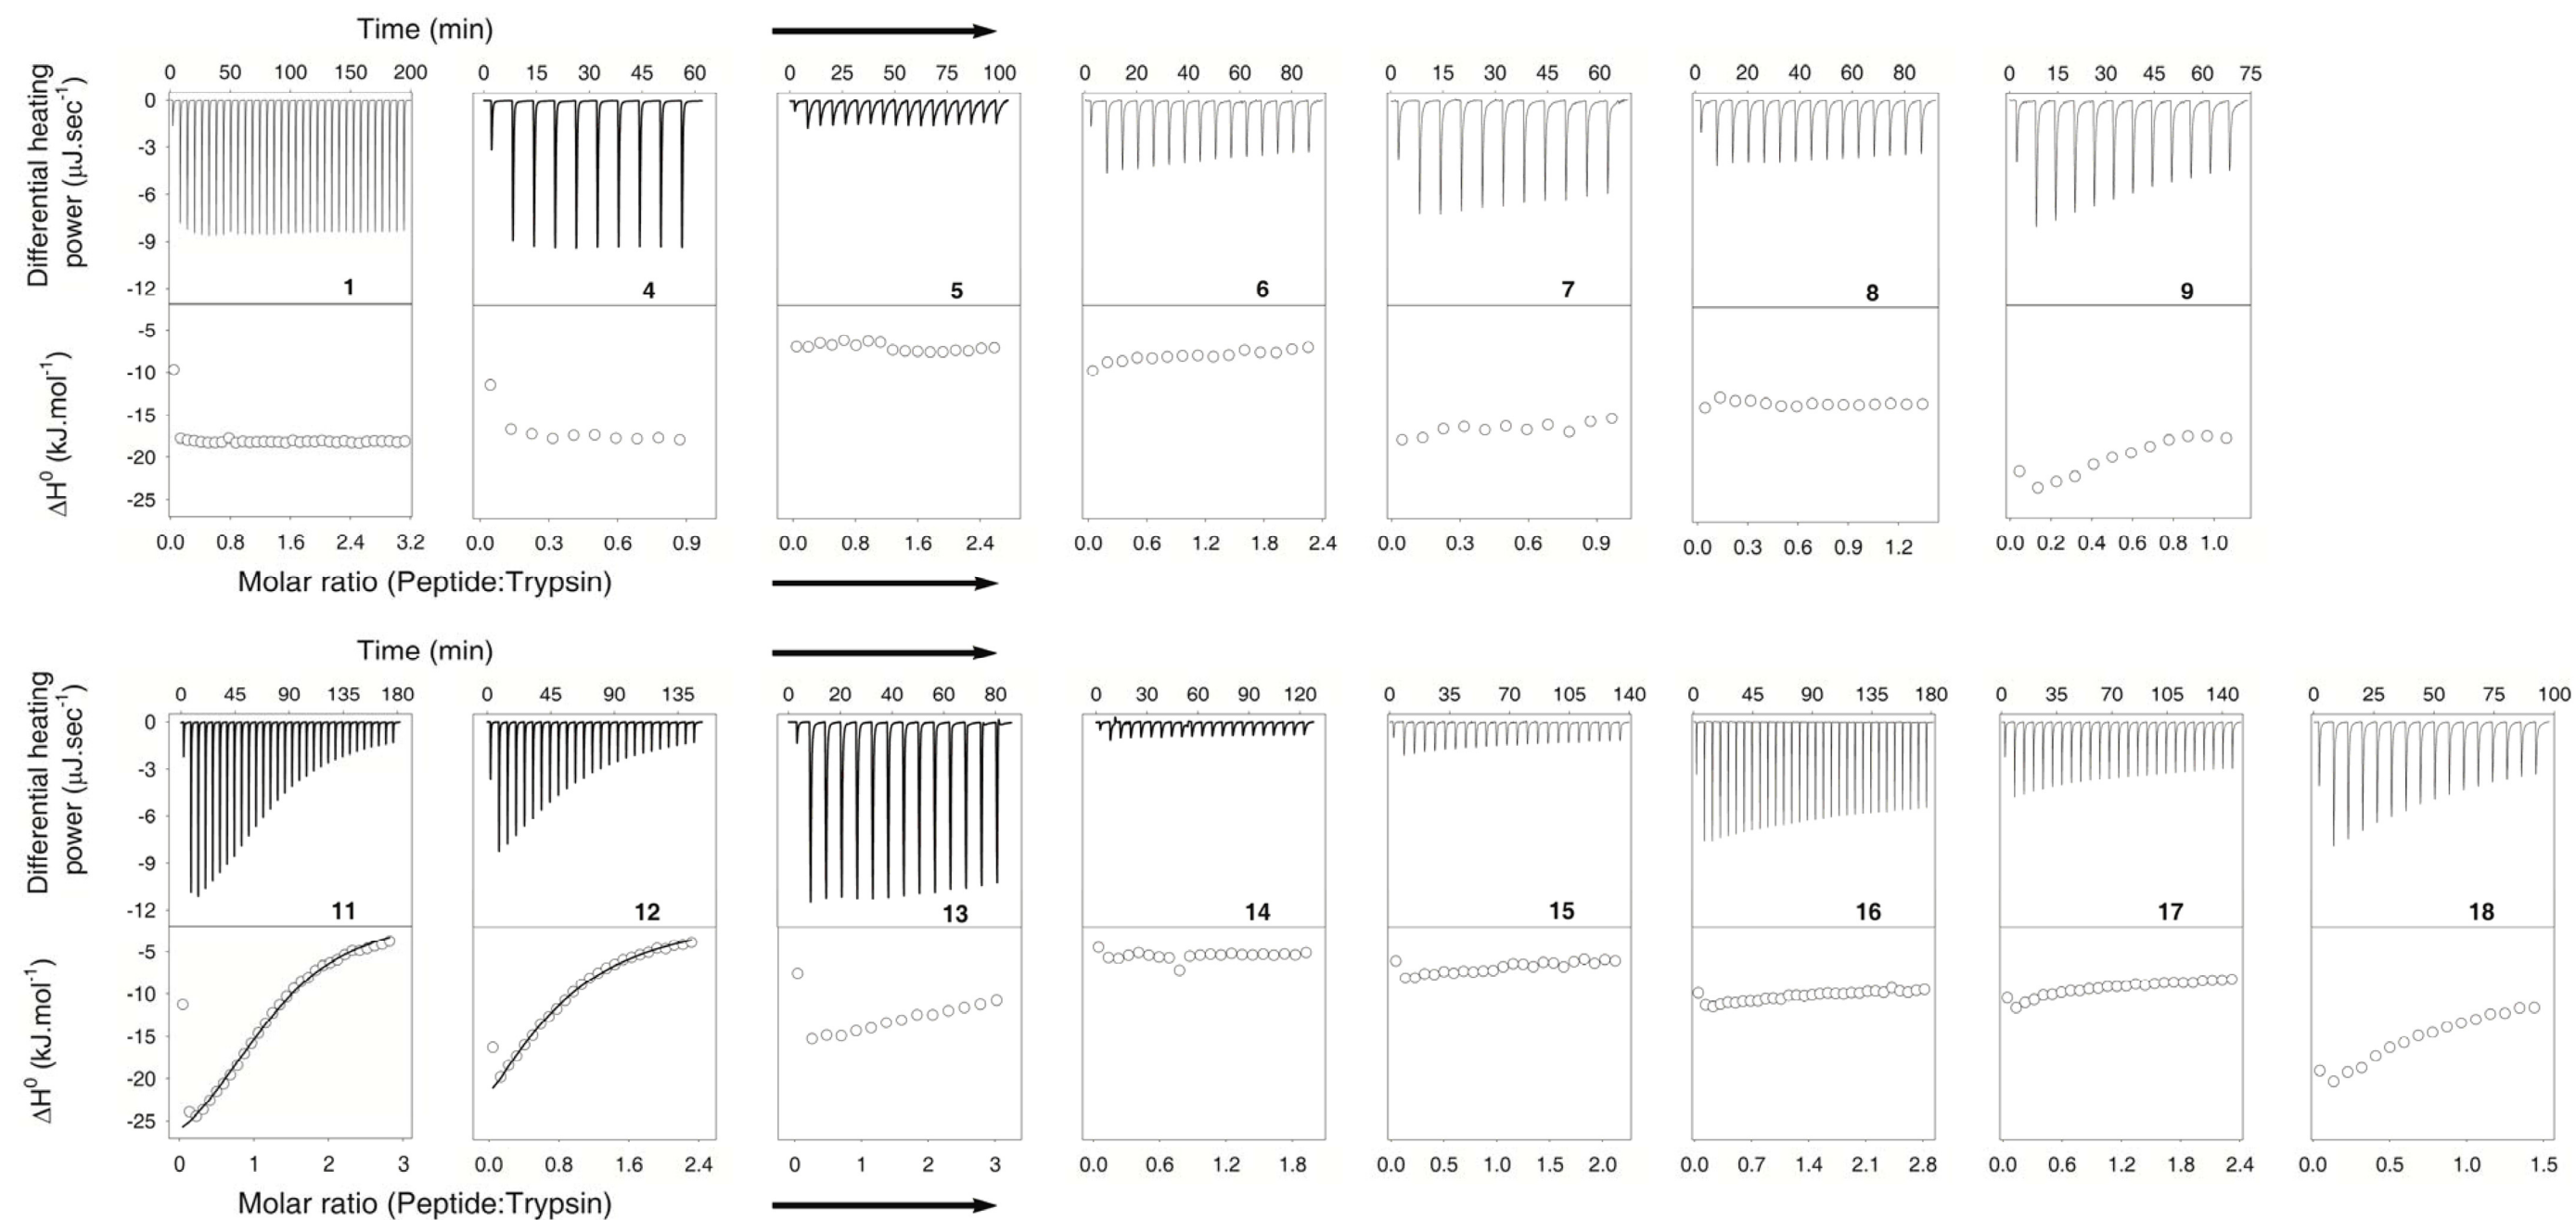

**Figure S8. The representative structure of trypsin used in the docking studies.** The structure with the highest percentage of occurrence generated from cluster analysis of trypsin (PDB ID: 4I8G) MD simulation in water for 20 ns. The left image shows enzyme binding pockets; e.g., S1 (composed of amino acid residues 189-192, 214-216, 224-228), S1' (composed of amino acid residues 41-45), S2 (composed of amino acid residues 57, 215, 99) and S2' (composed of amino acid residues 142-143, 151) in red, yellow, pink and orange colors, respectively. The right image shows the position of histidine-57, aspartate-102 and serin-195 in the enzyme catalytic triad with respect to aspartate-189 in the S1 binding site.

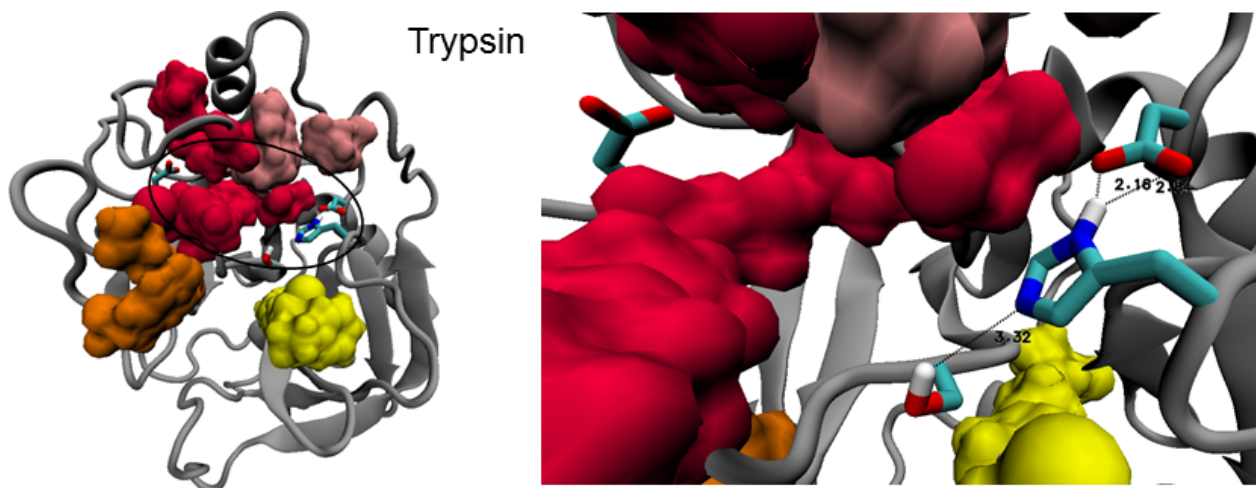

**Figure S9.** *The molecular docked models of synthetic battenecin 1 and its analogues with trypsin.* The left image is the interaction mode between the peptides and trypsin and right panel is the inset shows the interaction from a close view. The enzyme binding pockets S1 (red color) and S1' (yellow color) are shown here. The colors in the peptide structures define as follow: Trp (orange), Ile (violet), Arg/Har (blue), Lys/Dab/Orn (cyan), and the peptide backbone (green).

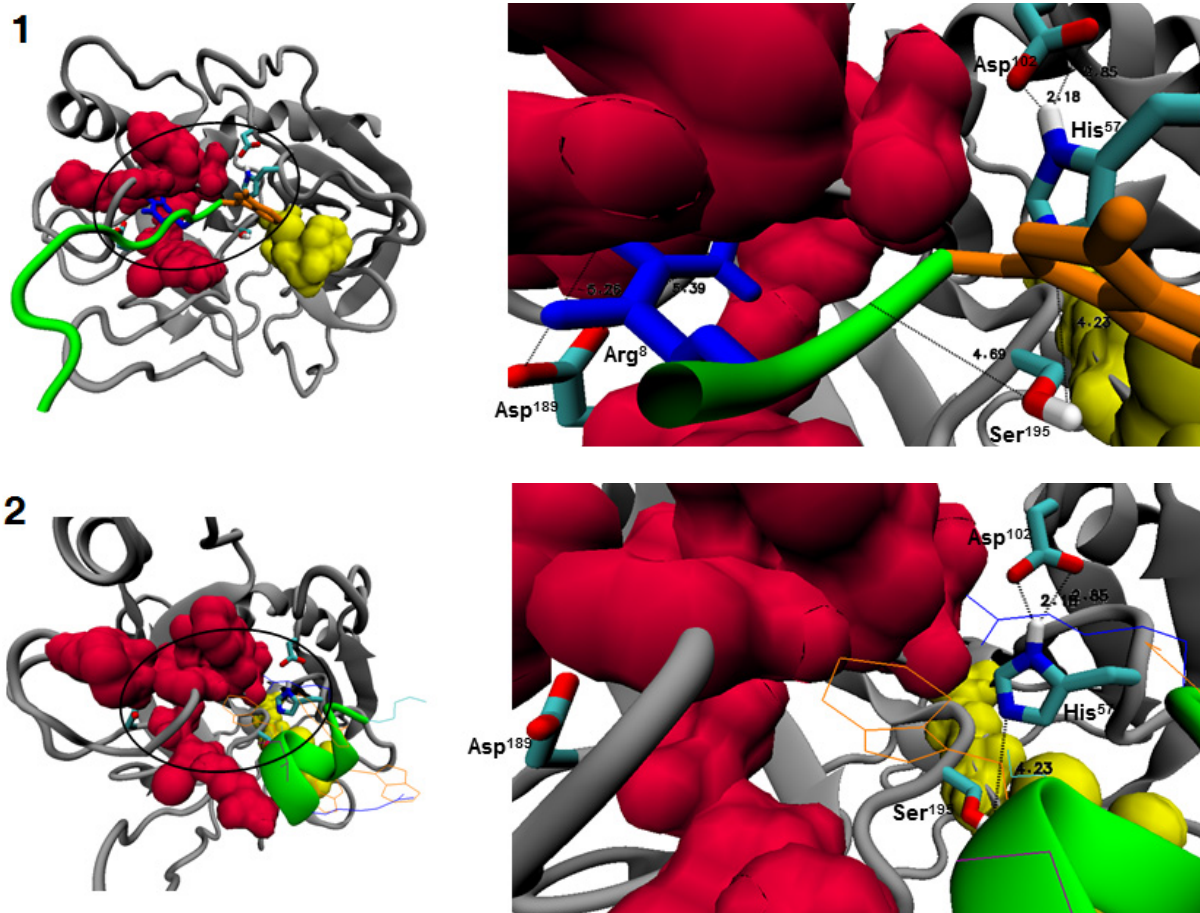



3

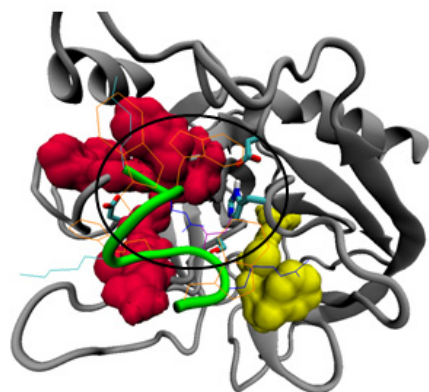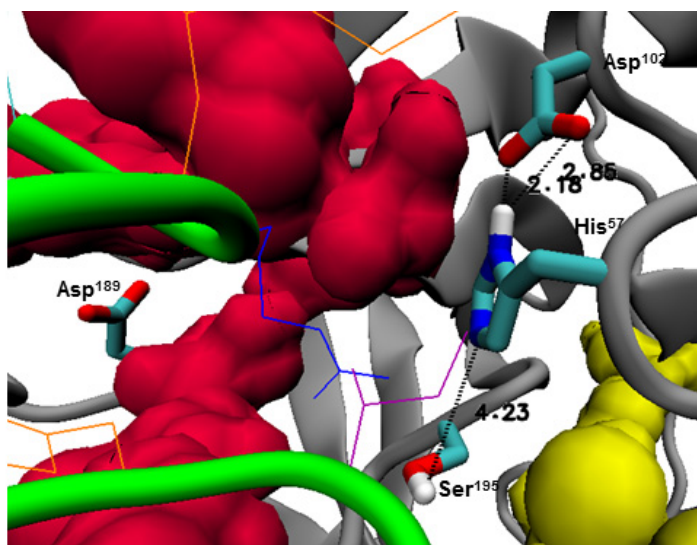

4

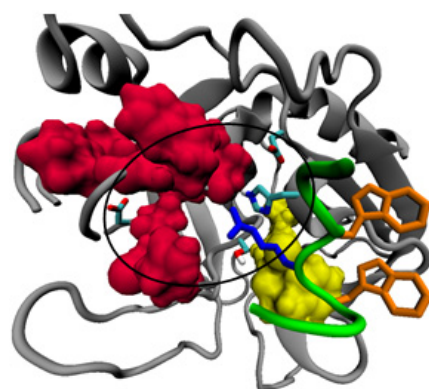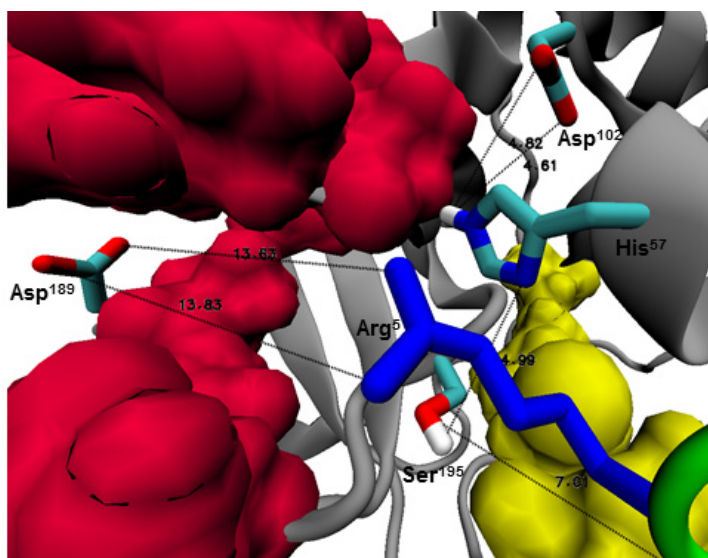

5

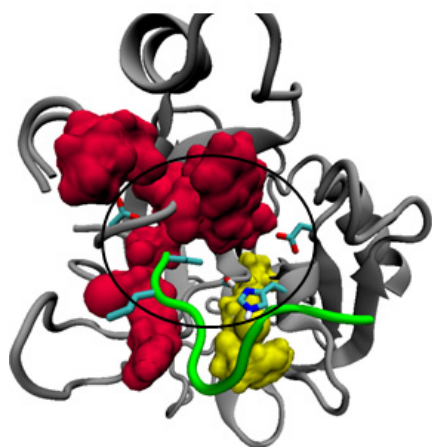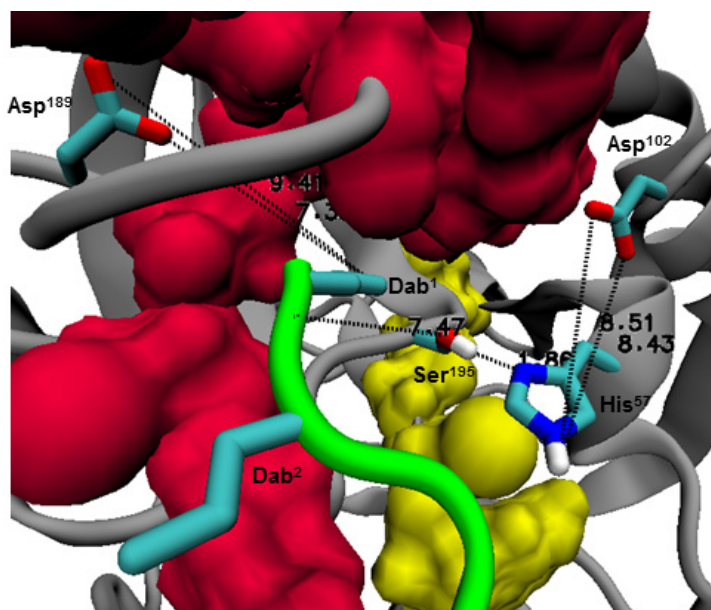

6

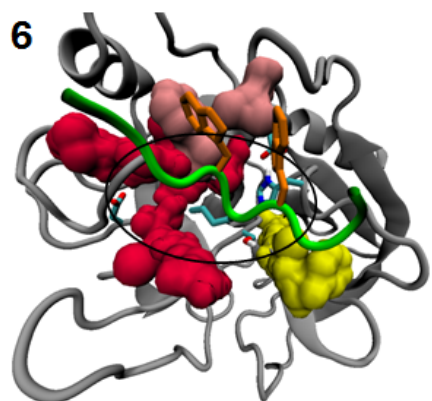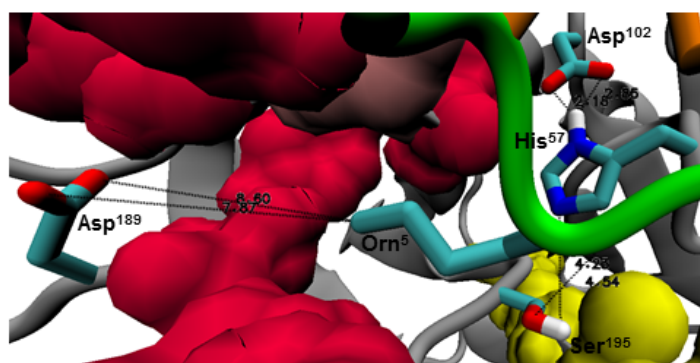

7

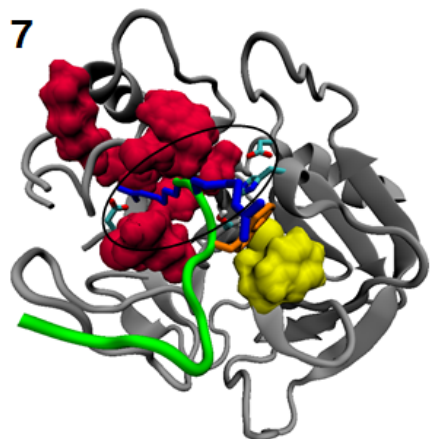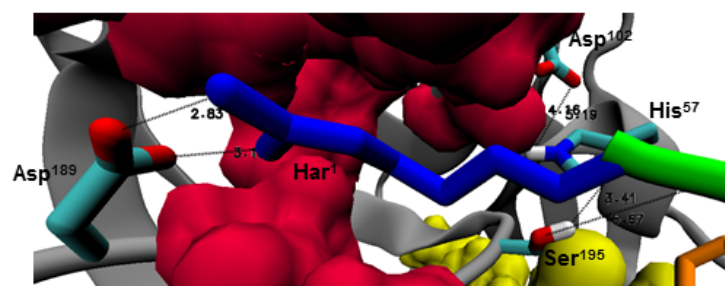

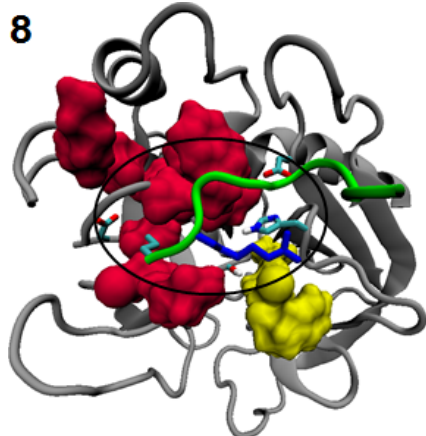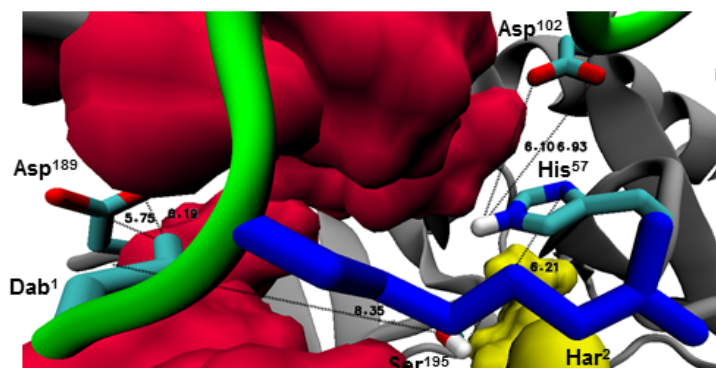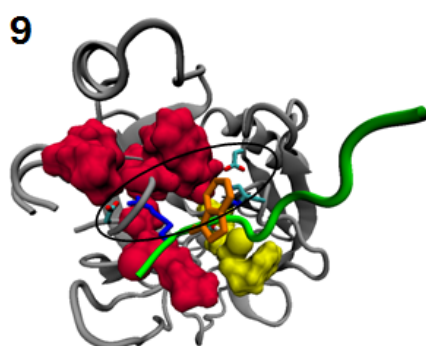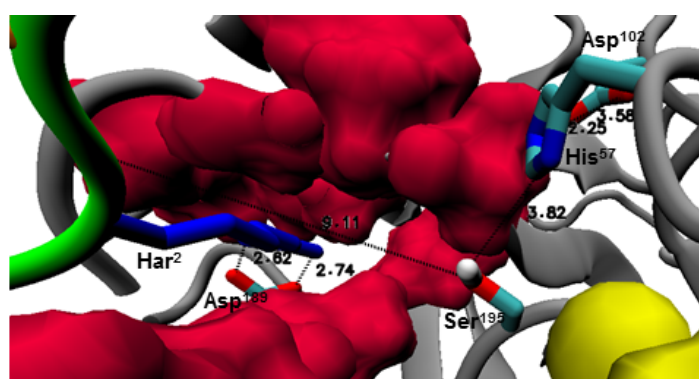



**Figure S10.** The molecular docked model of synthetic *bactenecin 10* and its analogues with trypsin. The left image is the interaction mode between the peptides and trypsin and right panel is the inset shows the interaction from a close view. The enzyme binding pockets S1 (red color) and S1' (yellow color) are shown here. The colors in the peptide structures define as follow: Trp (orange), Arg/Har (blue), Lys/Dab/Orn (cyan) and the peptide backbone (green).

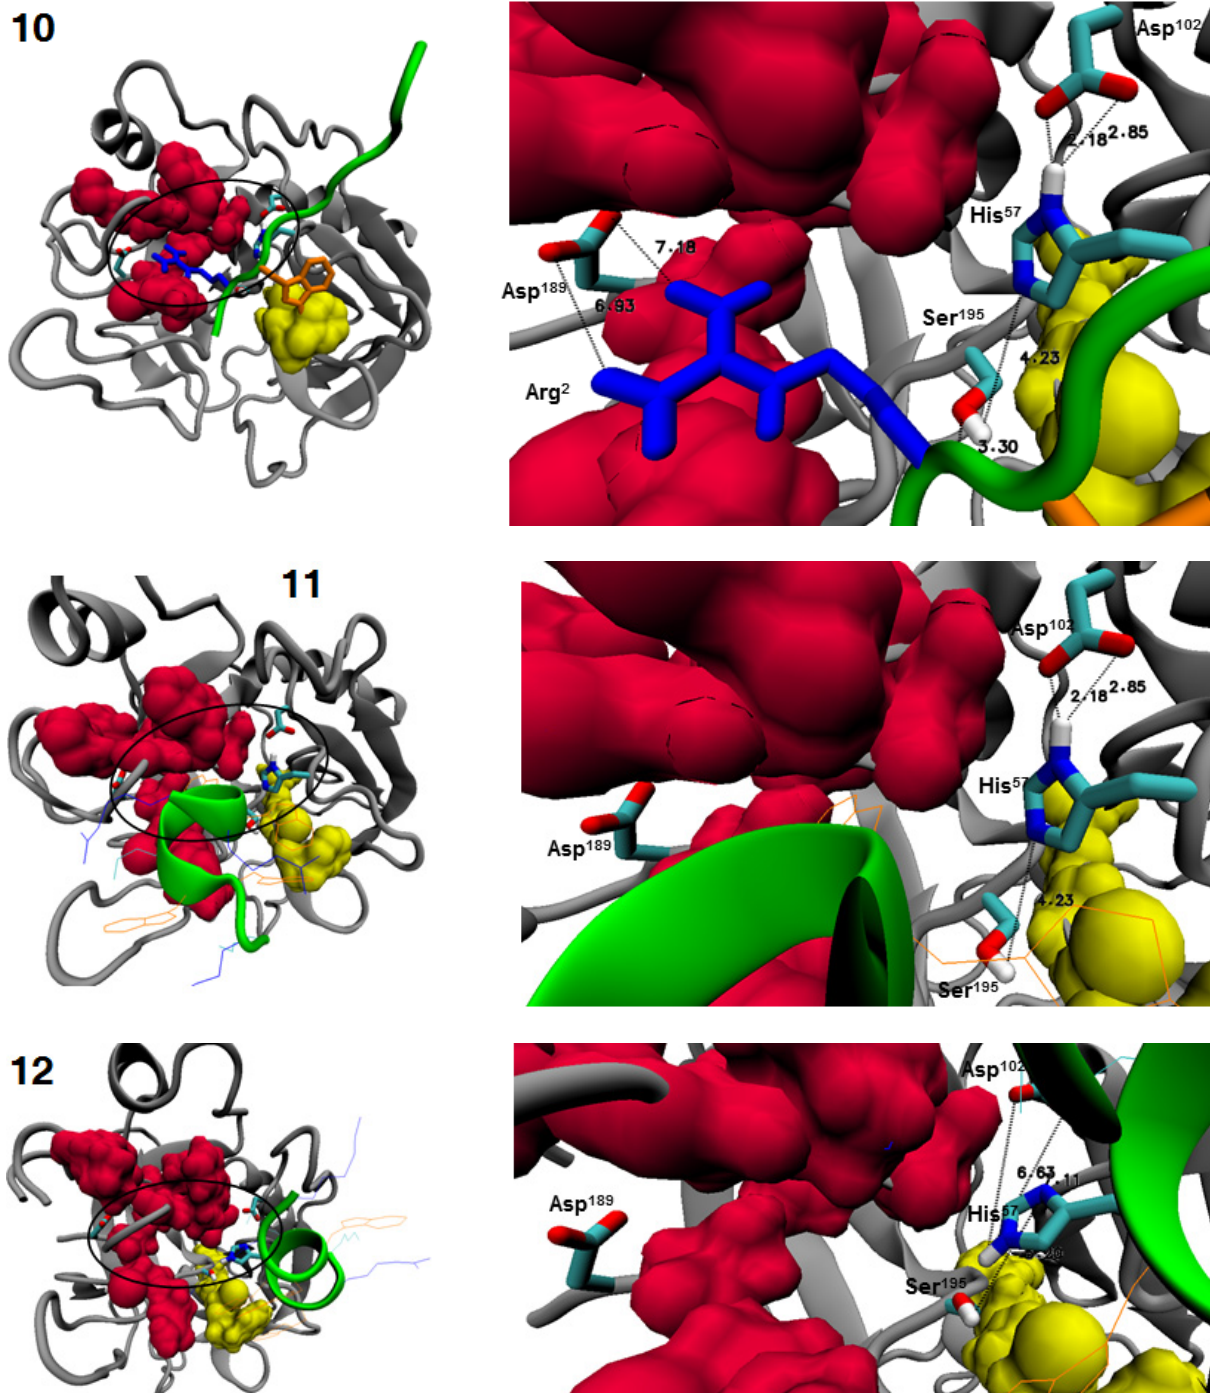

13

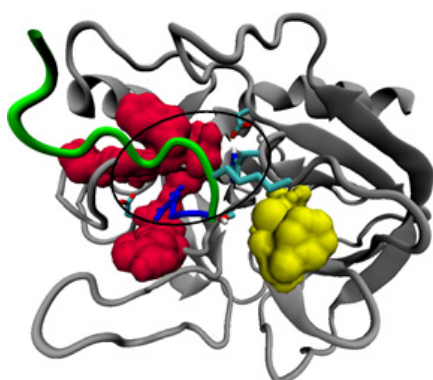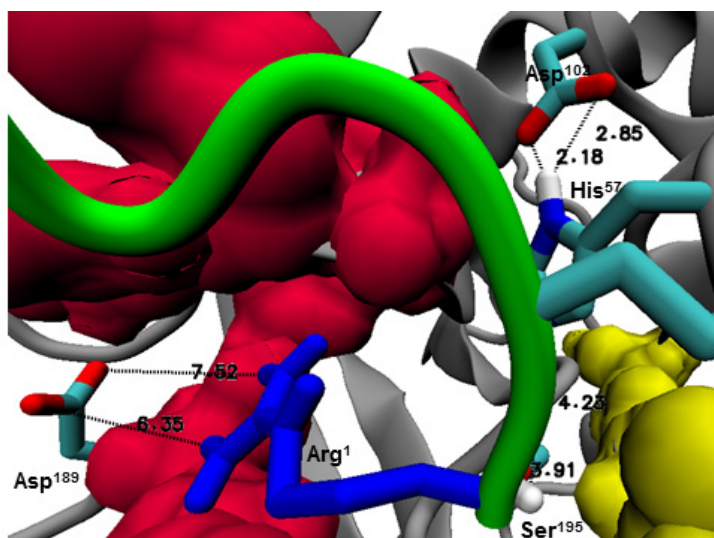

14

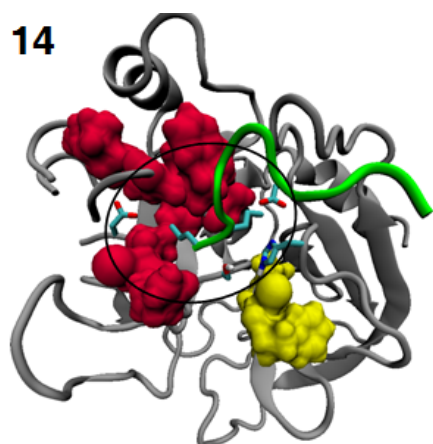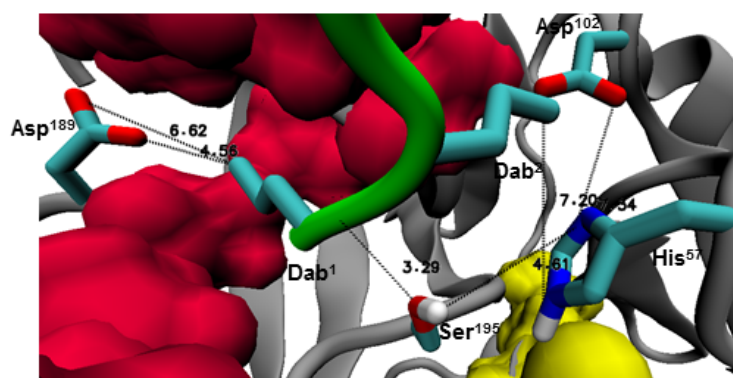

15

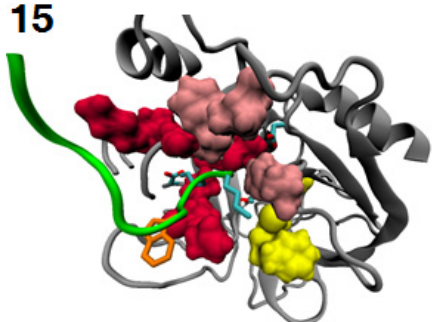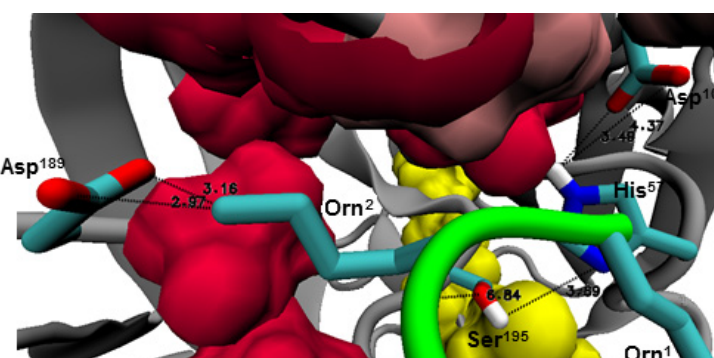



16

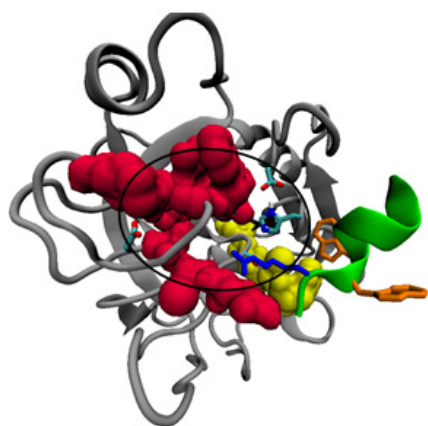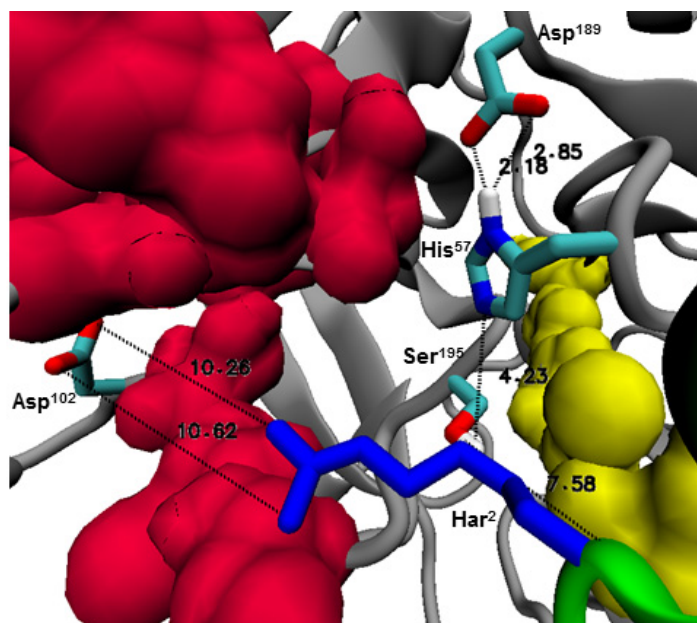

17

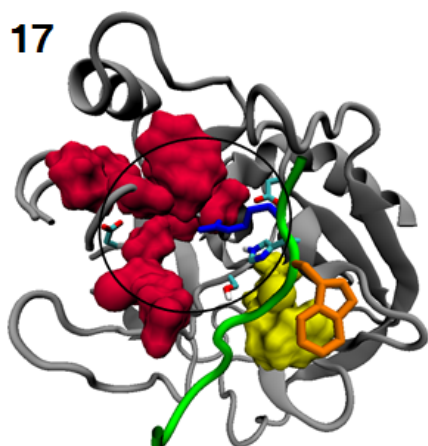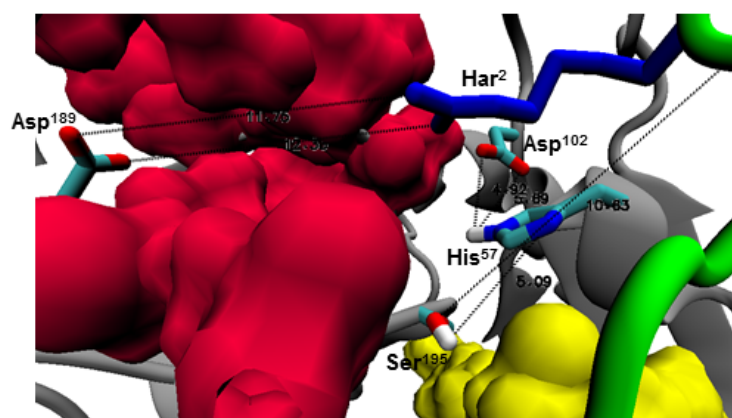

18

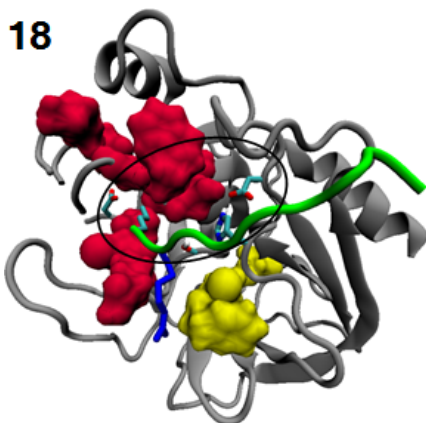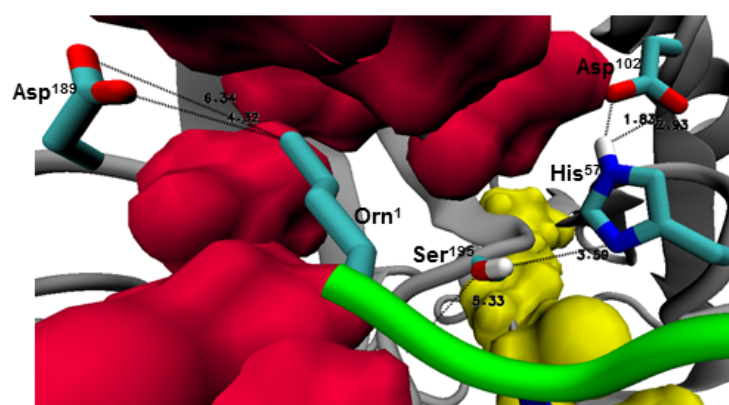

Supplement: Supplementary file 1 [file 4850419]
